# Supplementary material for: Discovery of Novel Thiophene-arylamide Derivatives as DprE1 Inhibitors with Potent Antimycobacterial Activities
Source: PubMed Central journal article supplement (PMC8154581; doi:10.1021/acs.jmedchem.1c00263), 2021-04-14
Supplement: jm1c00263_si_001.pdf [file jm1c00263_si_001.pdf]

# Supporting Information

## Discovery of Novel Thiophene-arylamide Derivatives as DprE1 Inhibitors with Potent Antimycobacterial Activities

*Pengxu Wang,<sup>||,†</sup> Sarah M. Batt,<sup>||,‡</sup> Bin Wang,<sup>§</sup> Lei Fu,<sup>§</sup> Rongfei Qin,<sup>†</sup> Yu Lu,<sup>§</sup> Gang Li,<sup>\*,†</sup> Gurdyal S. Besra,<sup>\*,‡</sup> and Haihong Huang<sup>\*,†</sup>*

<sup>†</sup>Beijing Key Laboratory of Active Substance Discovery and Druggability Evaluation & Chinese Academy of Medical Sciences Key Laboratory of Anti-DR TB Innovative Drug Research, Institute of Materia Medica, Peking Union Medical College and Chinese Academy of Medical Sciences, 1 Xian Nong Tan Street, Beijing 100050, P. R. China

<sup>‡</sup>School of Biosciences, University of Birmingham, Birmingham B15 2TT, United Kingdom

<sup>§</sup>Beijing Key Laboratory of Drug Resistance Tuberculosis Research, Department of Pharmacology, Beijing Tuberculosis and Thoracic Tumor Research Institute, Beijing Chest Hospital, Capital Medical University, 97 Ma Chang Street, Beijing 101149, P. R. China

E-mail: ligang@imm.ac.cn, g.besra@bham.ac.uk, joyce@imm.ac.cn

### List of Contents:

|                                                                             |       |
|-----------------------------------------------------------------------------|-------|
| Title page.....                                                             | S1    |
| <sup>1</sup> H NMR and <sup>13</sup> C NMR spectra of target compounds..... | S2-46 |
| Molecular docking.....                                                      | S47   |

# $^1\text{H}$ NMR and $^{13}\text{C}$ NMR spectra of target compounds

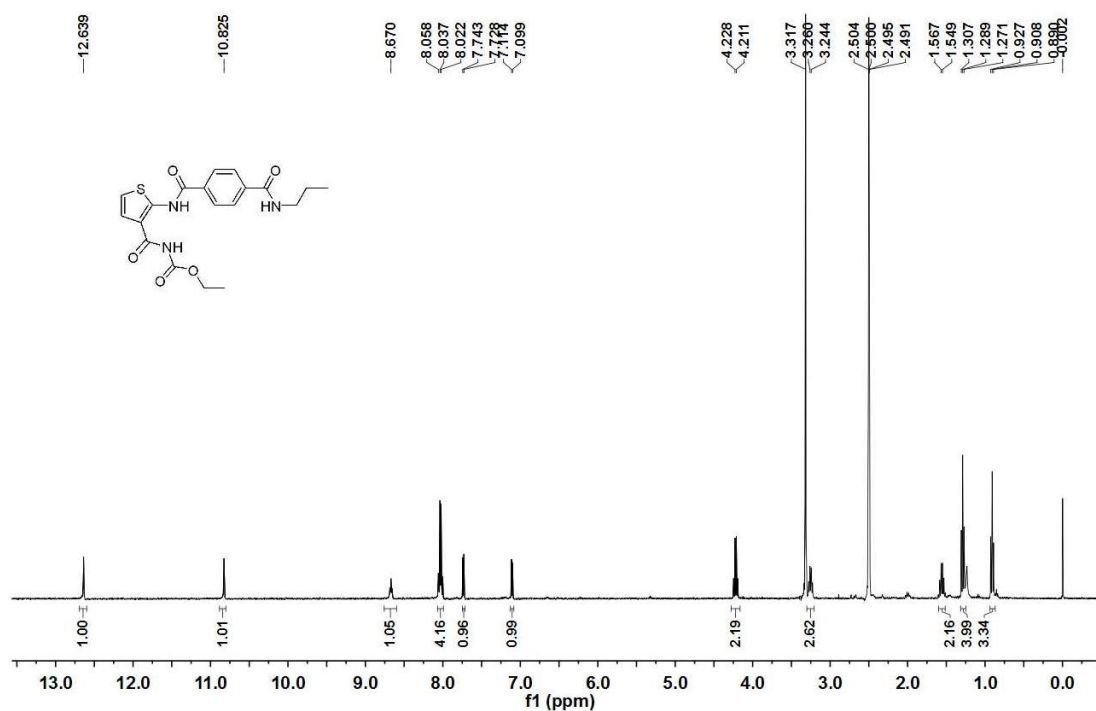

Figure S1.  $^1\text{H}$  NMR spectrum of 23a.

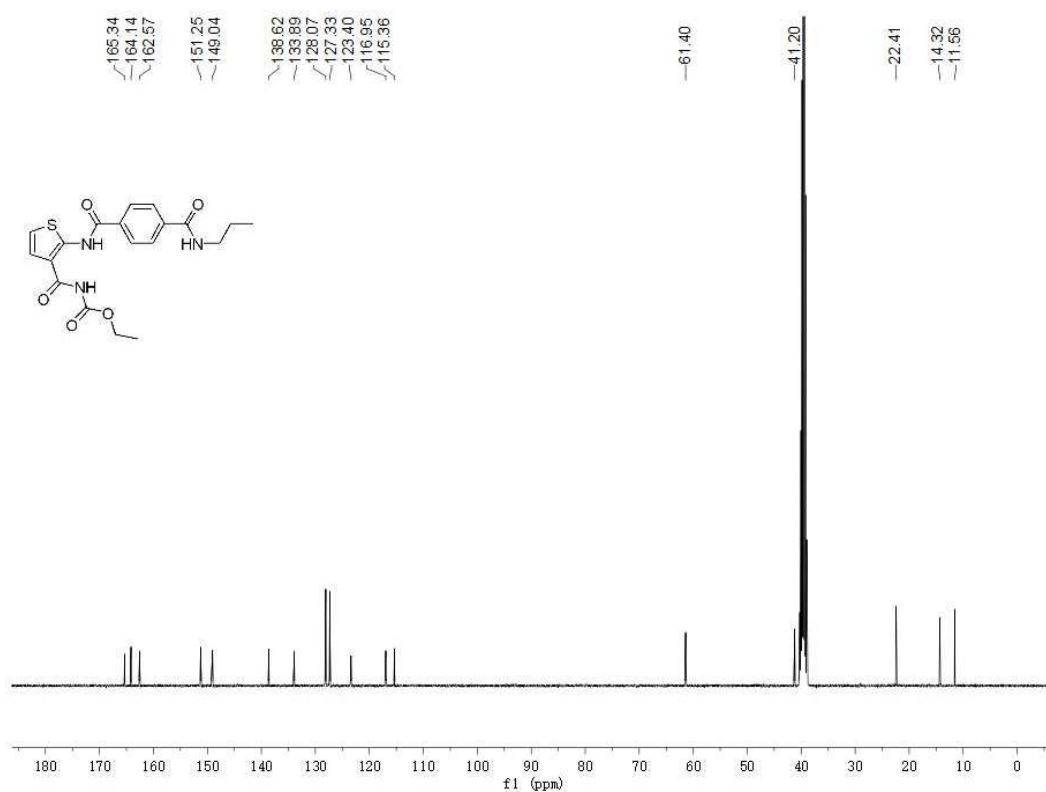

Figure S2.  $^{13}\text{C}$  NMR spectrum of 23a.

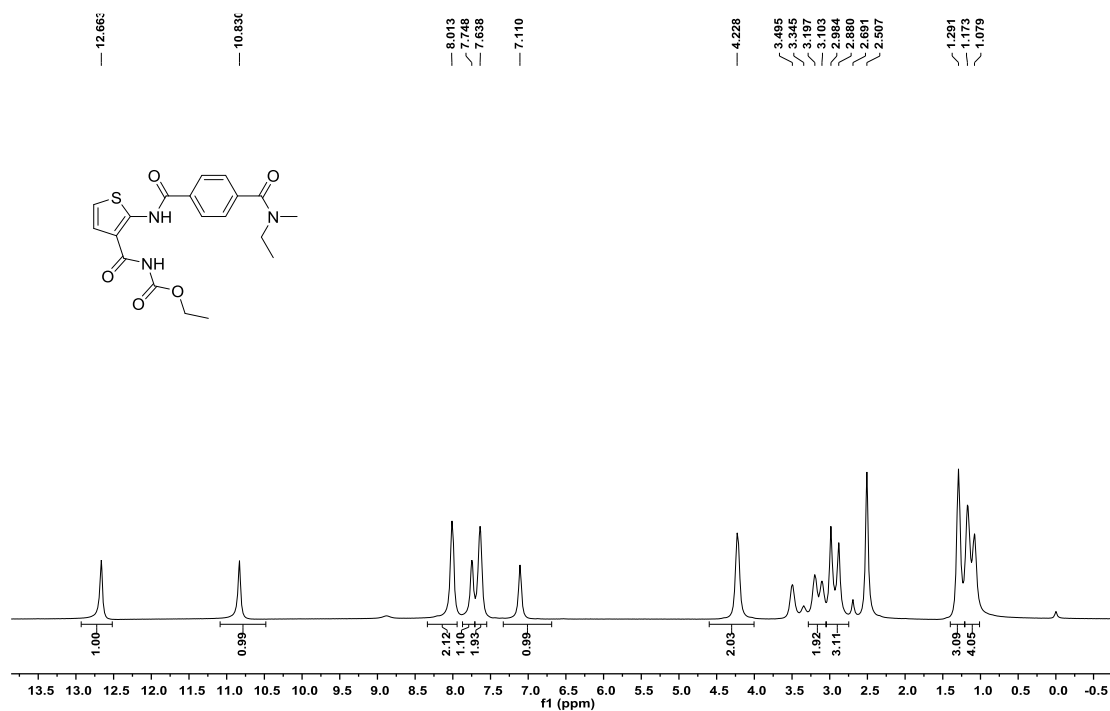

Figure S3. <sup>1</sup>H NMR spectrum of 23b.

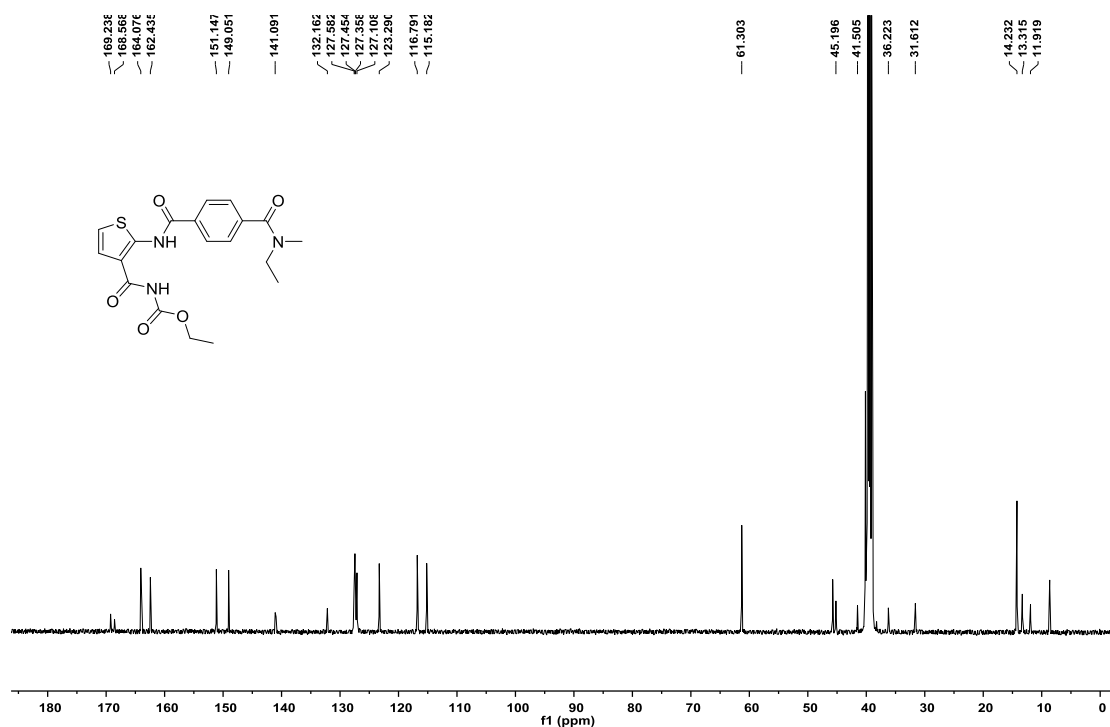

Figure S4. <sup>13</sup>C NMR spectrum of 23b.

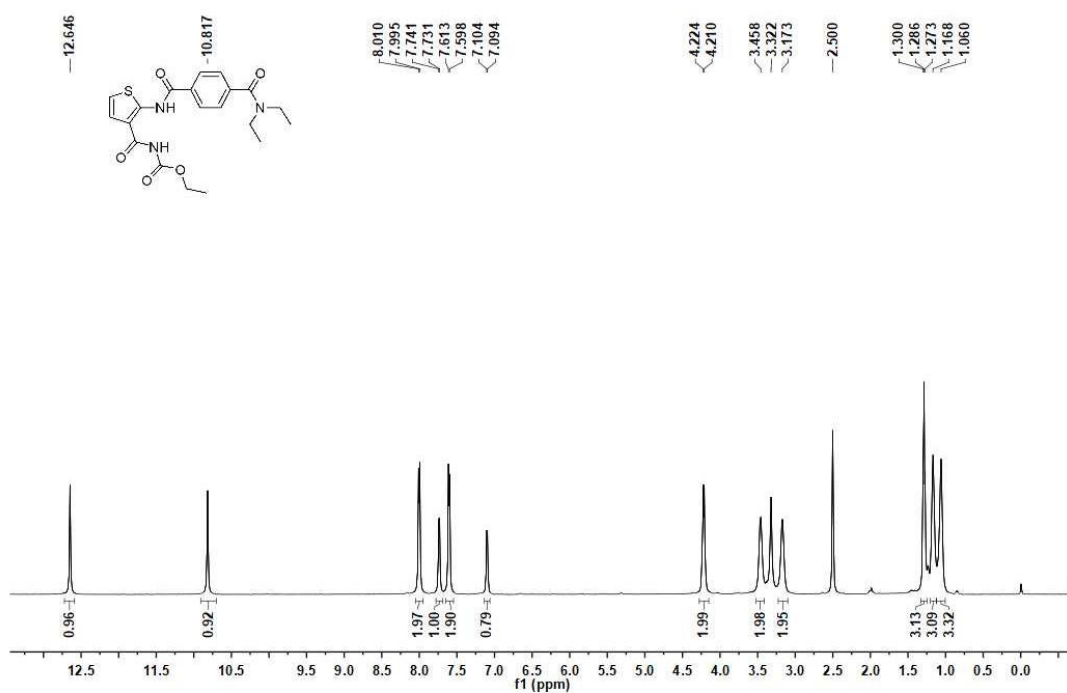

Figure S5. <sup>1</sup>H NMR spectrum of 23c.

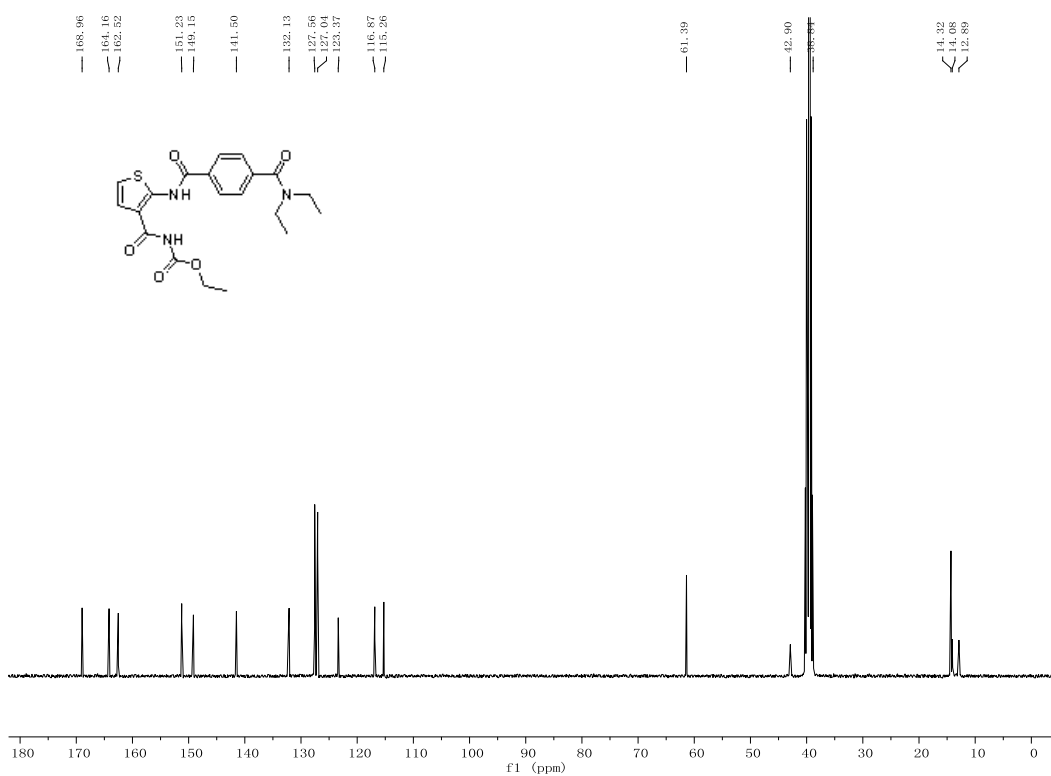

Figure S6. <sup>13</sup>C NMR spectrum of 23c.

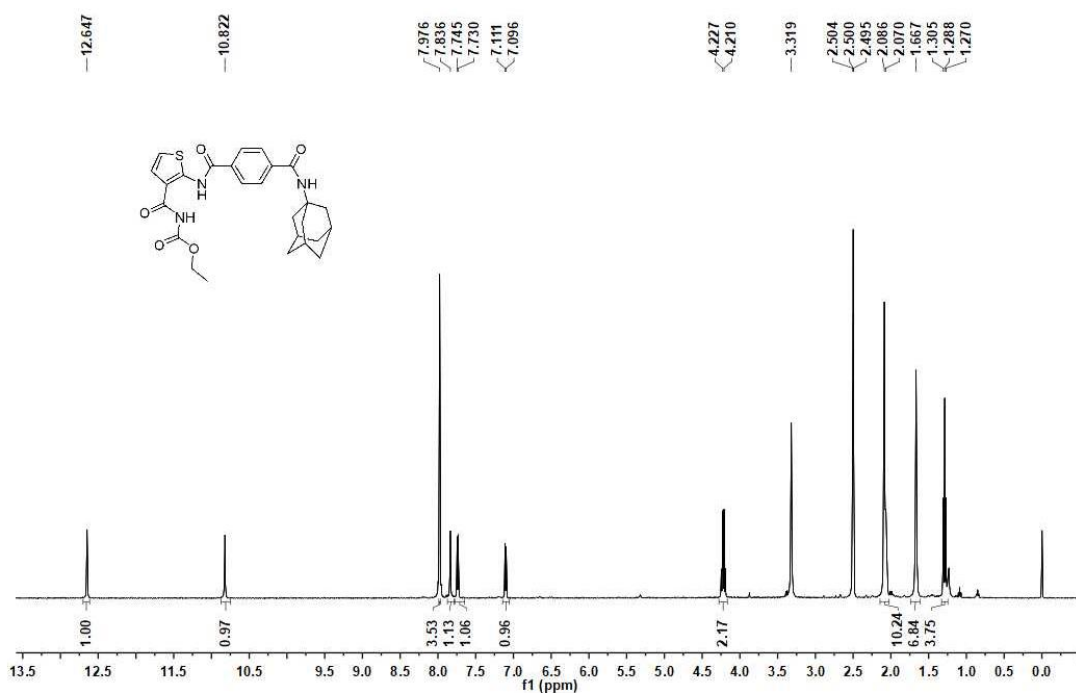

Figure S7. <sup>1</sup>H NMR spectrum of 23d.

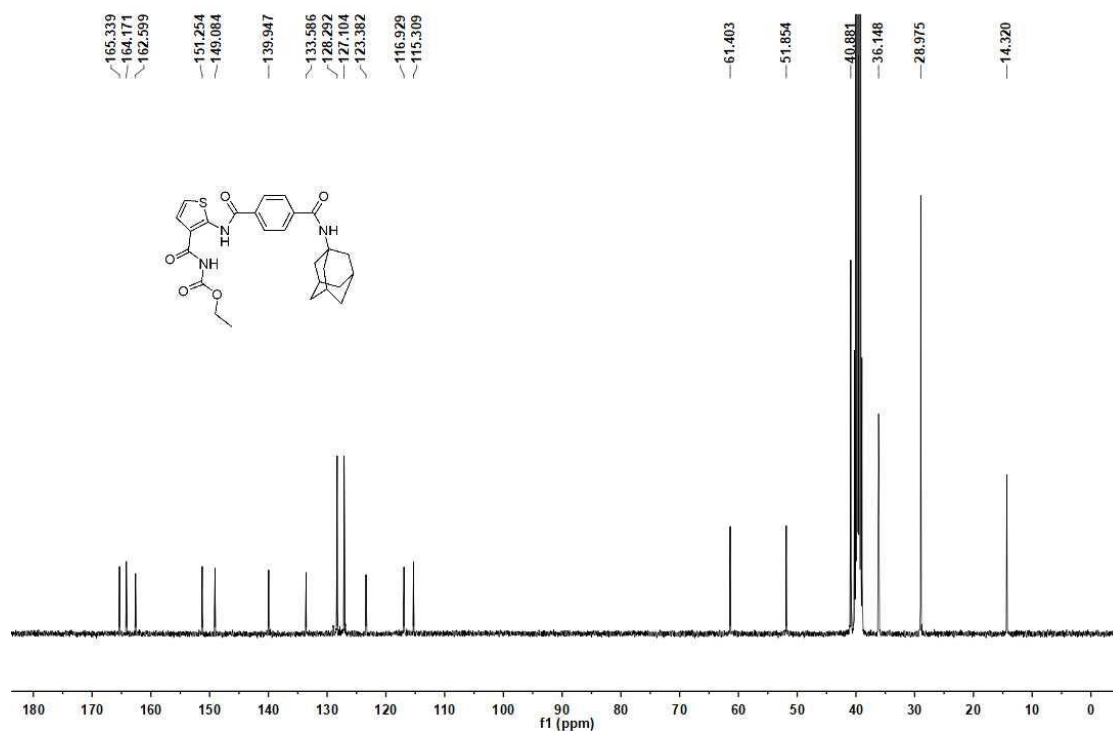

Figure S8. <sup>13</sup>C NMR spectrum of 23d.

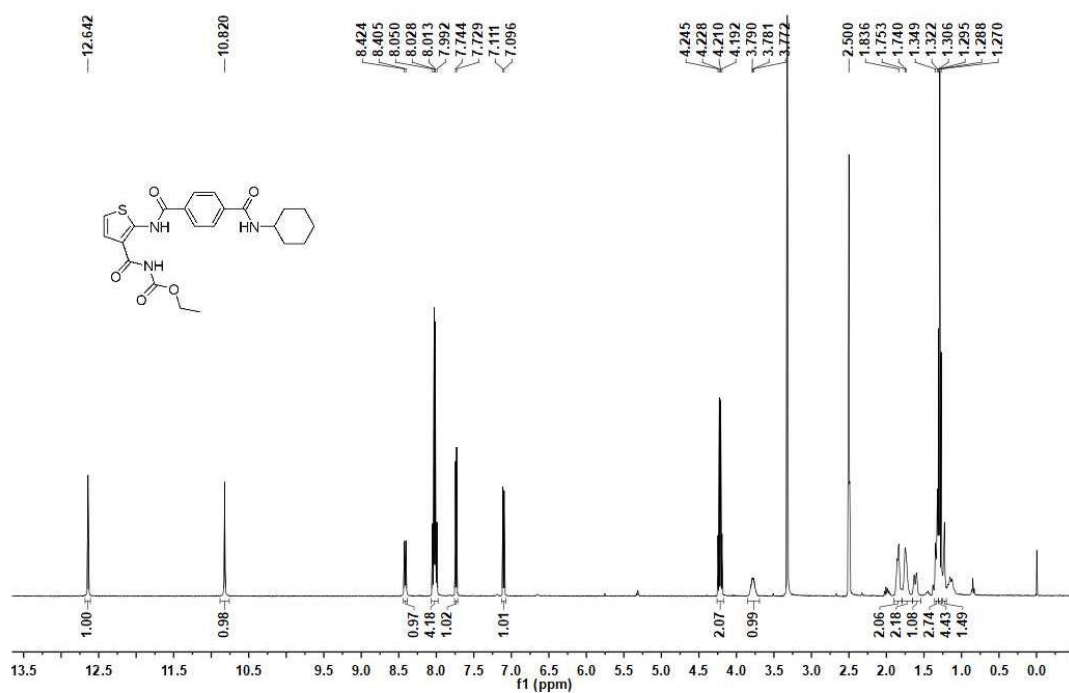

Figure S9. <sup>1</sup>H NMR spectrum of 23e.

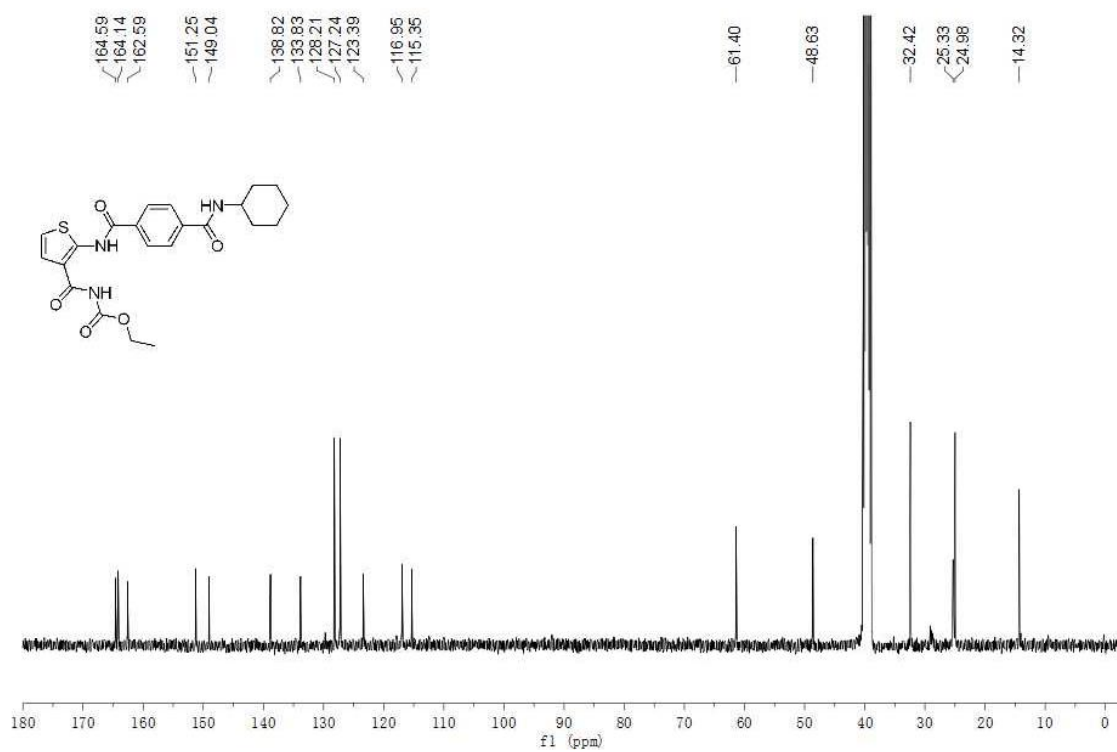

Figure S10. <sup>13</sup>C NMR spectrum of 23e.

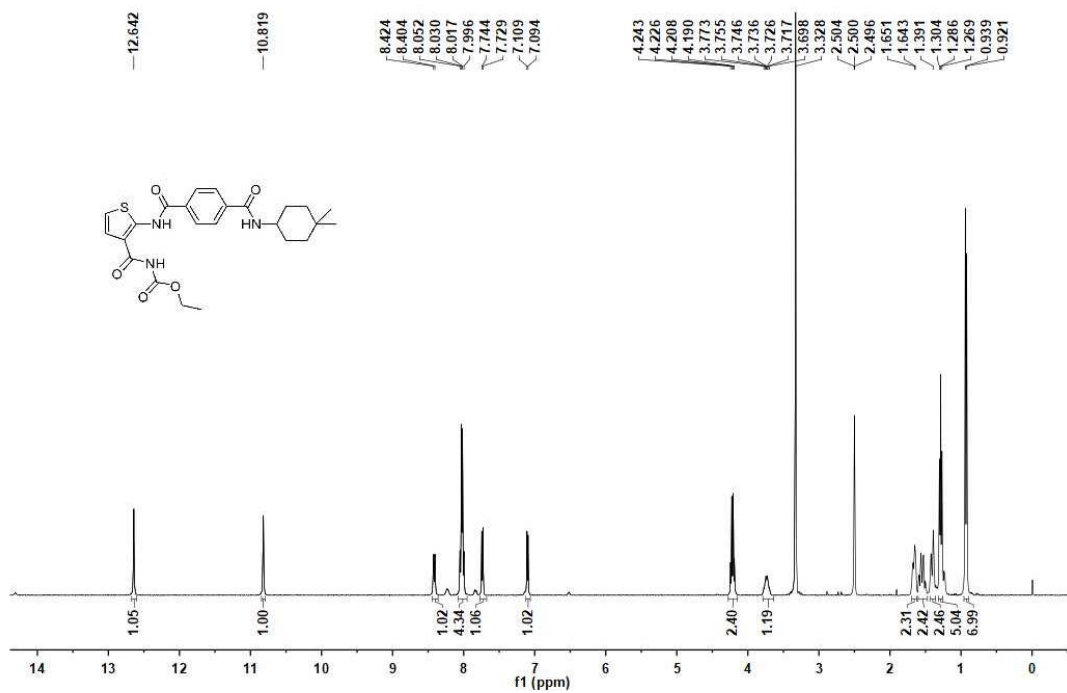

Figure S11.  $^1\text{H}$  NMR spectrum of 23f.

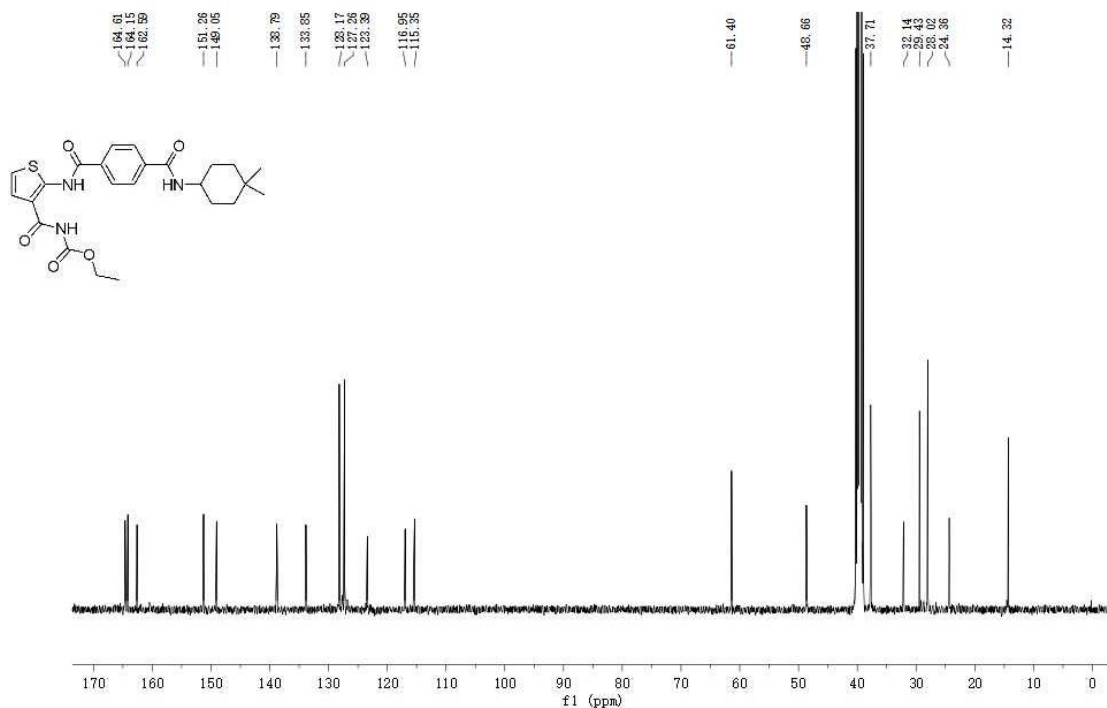

Figure S12.  $^{13}\text{C}$  NMR spectrum of 23f.

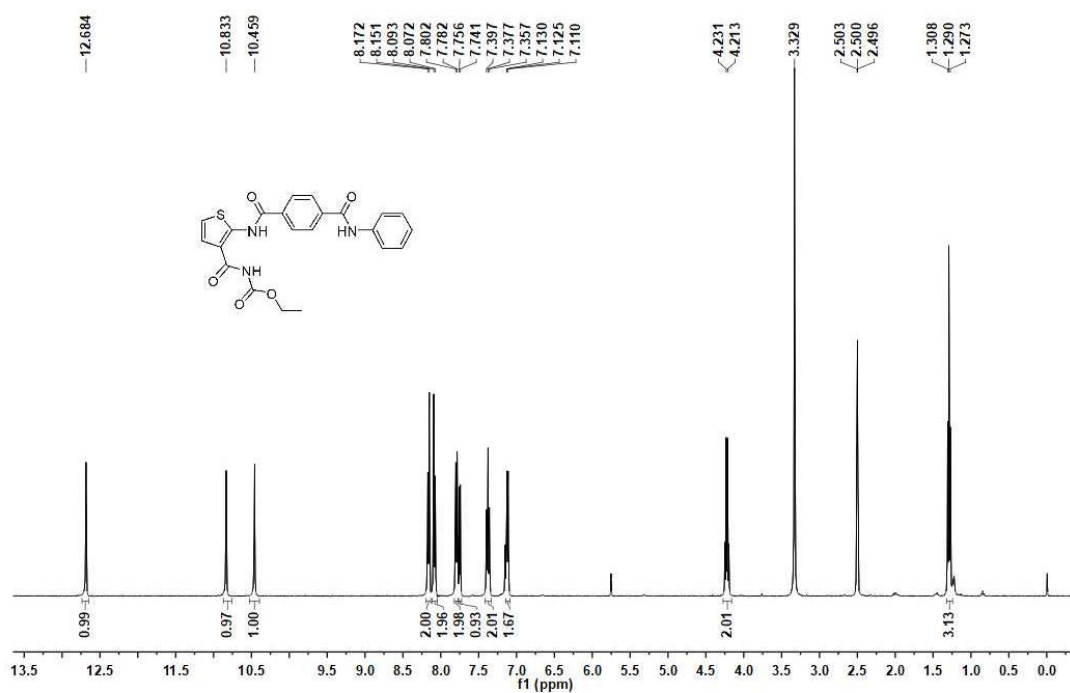

Figure S13.  $^1\text{H}$  NMR spectrum of 23g.

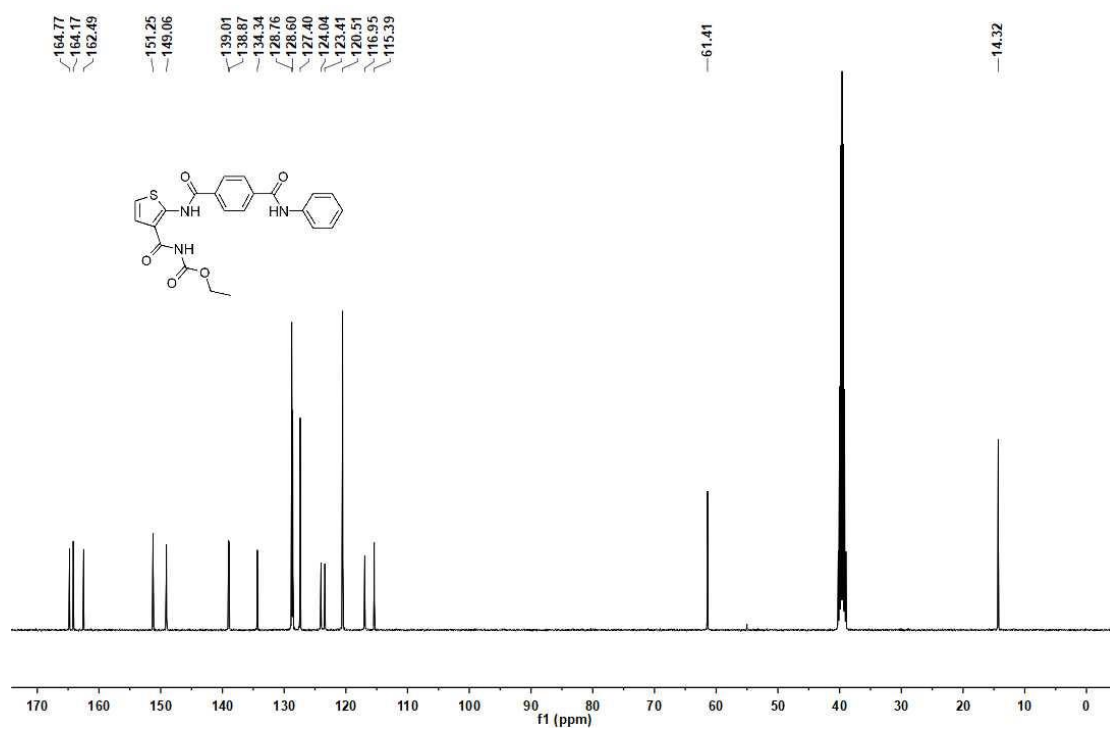

Figure S14.  $^{13}\text{C}$  NMR spectrum of 23g.



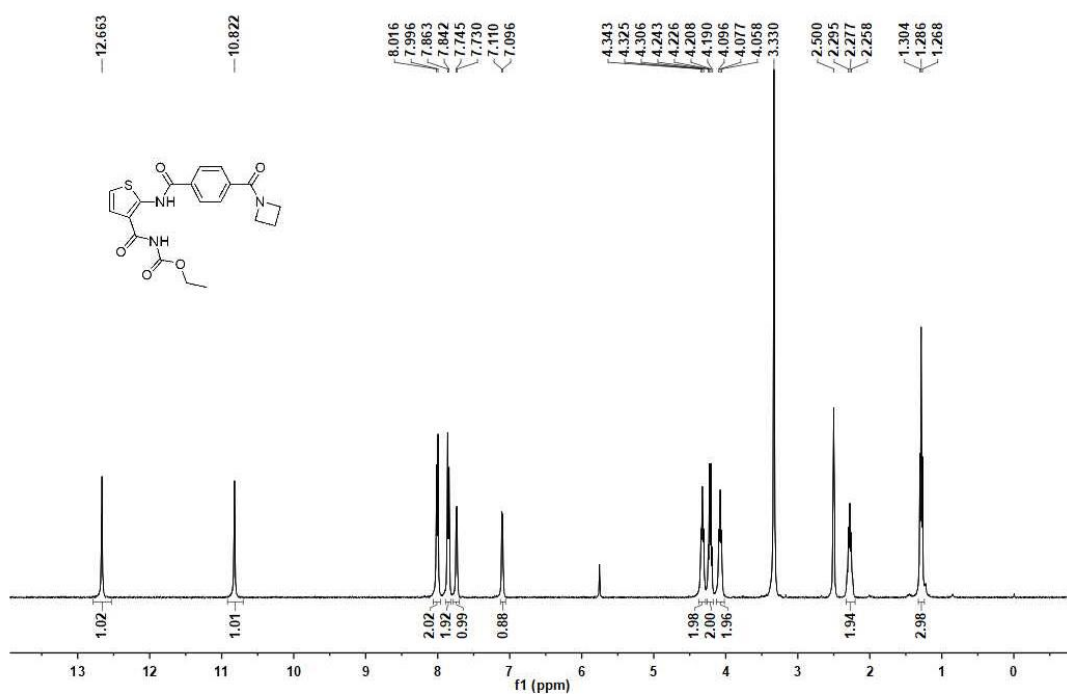

Figure S15. <sup>1</sup>H NMR spectrum of 23h.

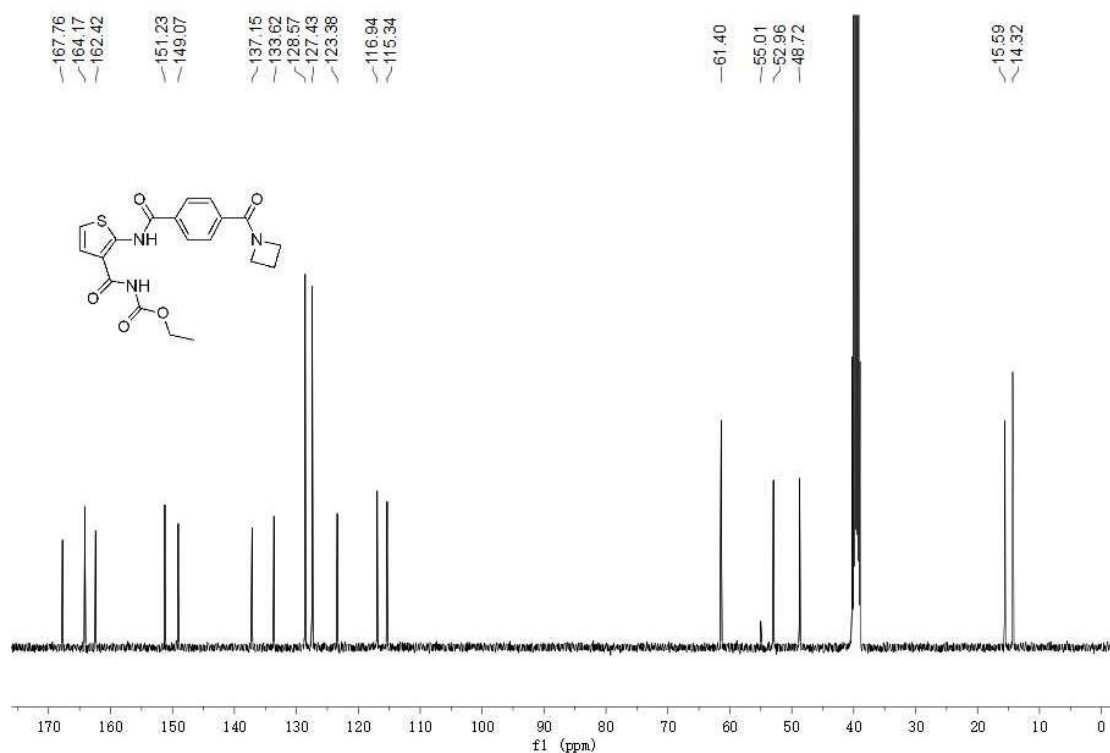

Figure S16. <sup>13</sup>C NMR spectrum of 23h.

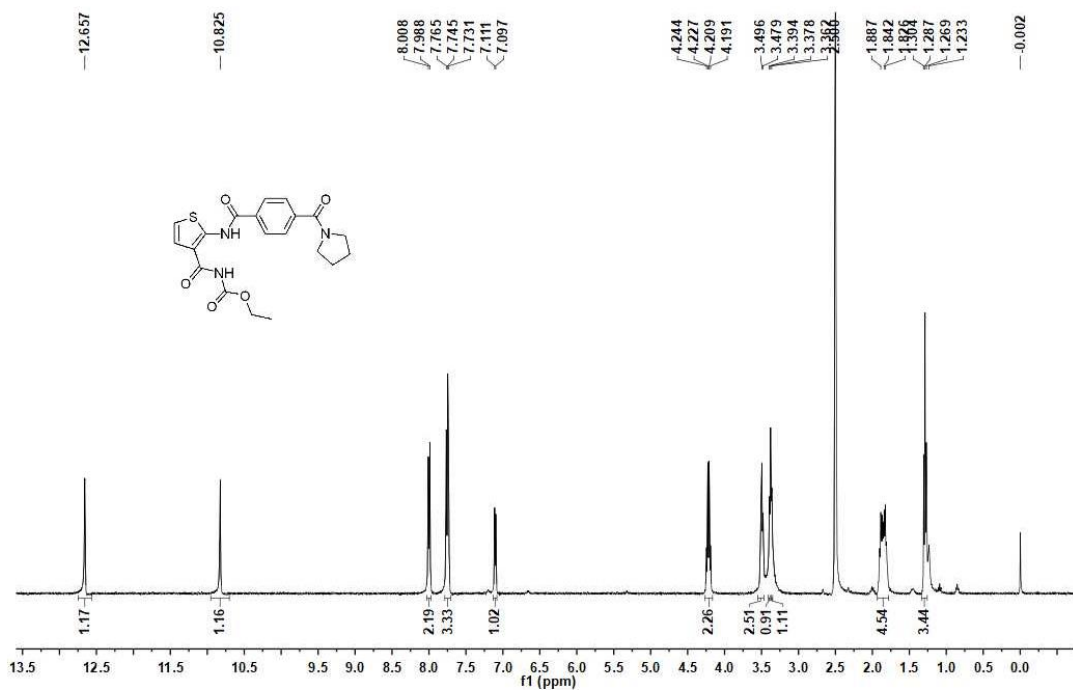

Figure S17. <sup>1</sup>H NMR spectrum of 23i.

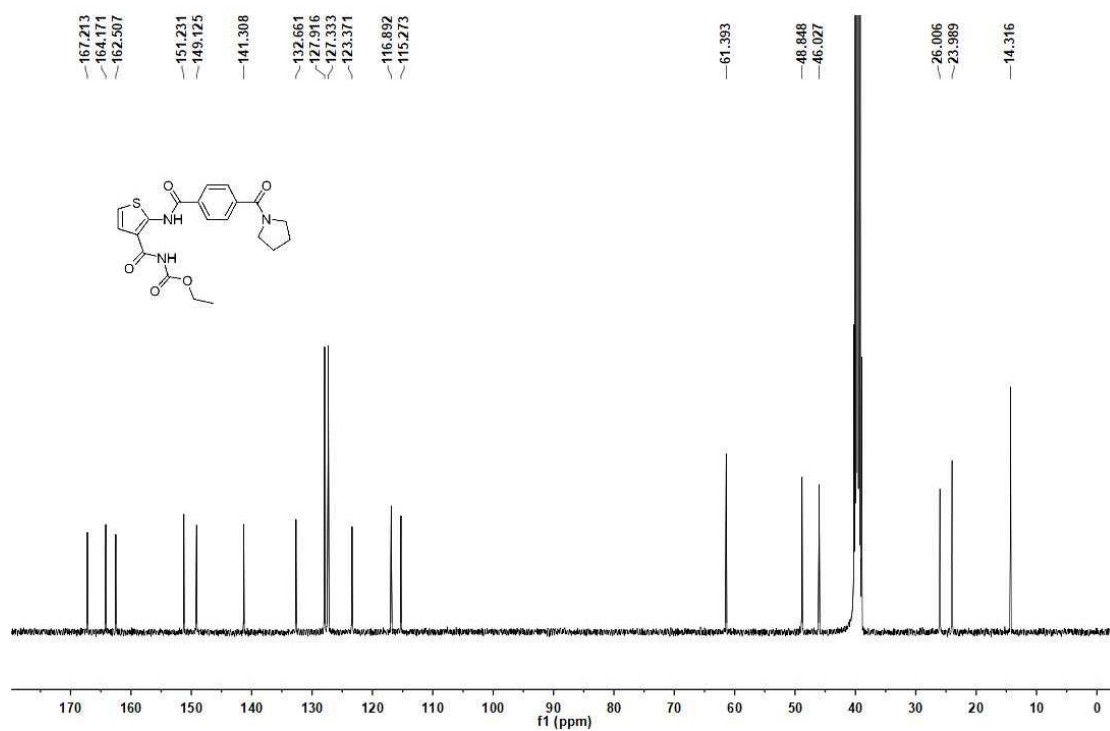

Figure S18. <sup>13</sup>C NMR spectrum of 23i.

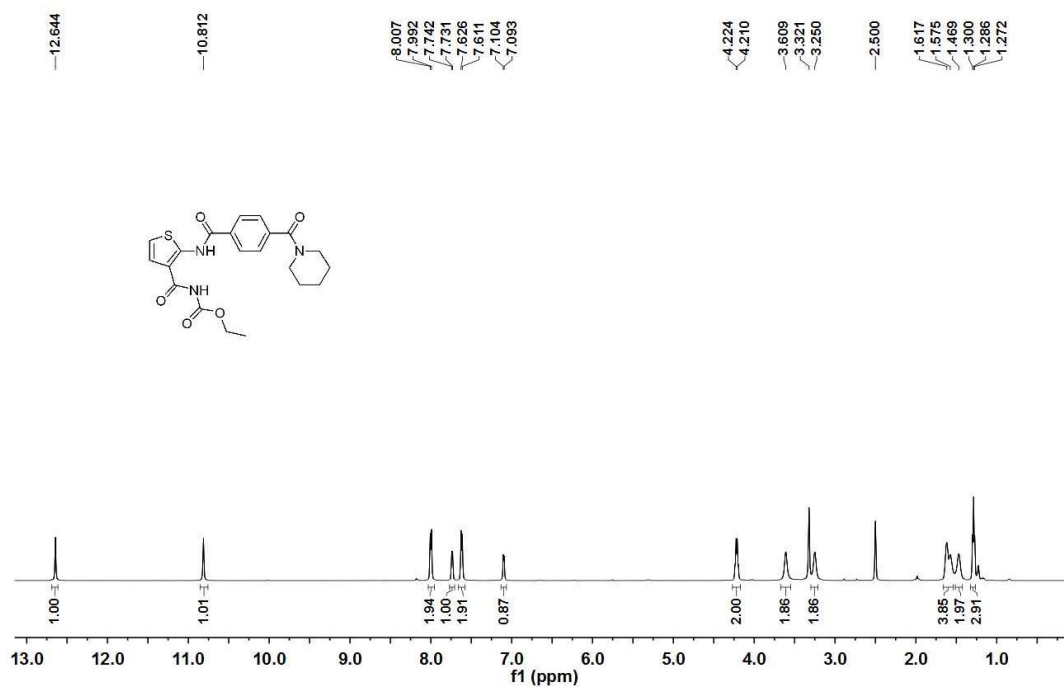

Figure S19.  $^1\text{H}$  NMR spectrum of 23j.

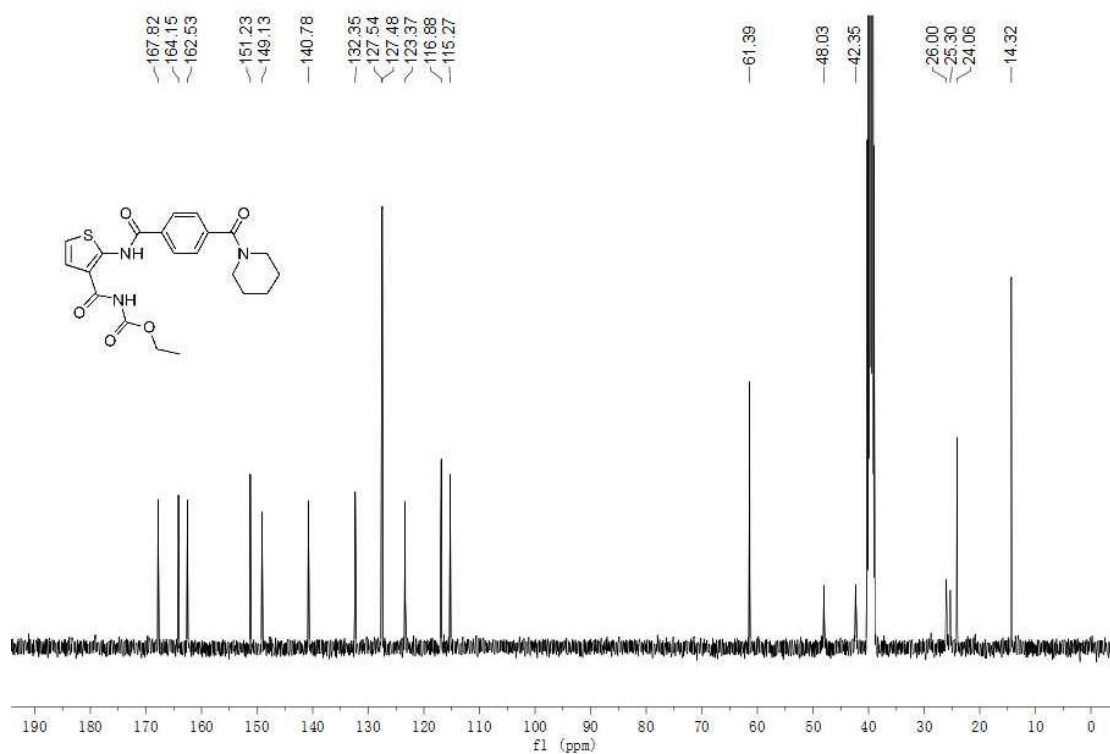

Figure S20.  $^{13}\text{C}$  NMR spectrum of 23j.

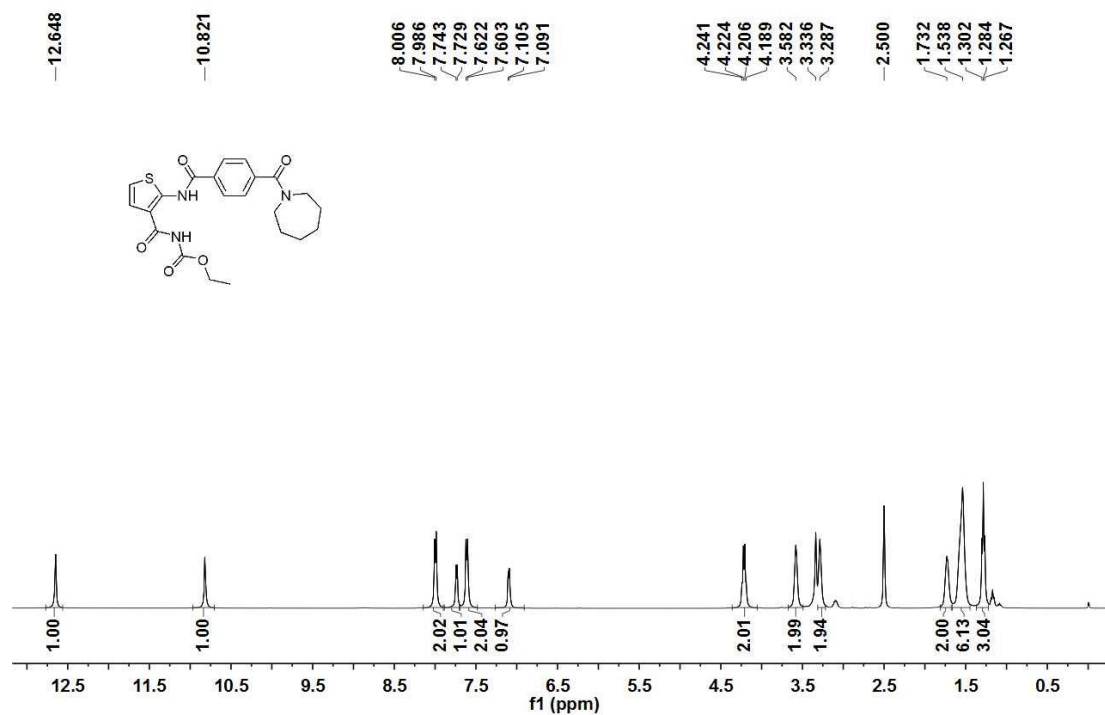

Figure S21. <sup>1</sup>H NMR spectrum of 23k.

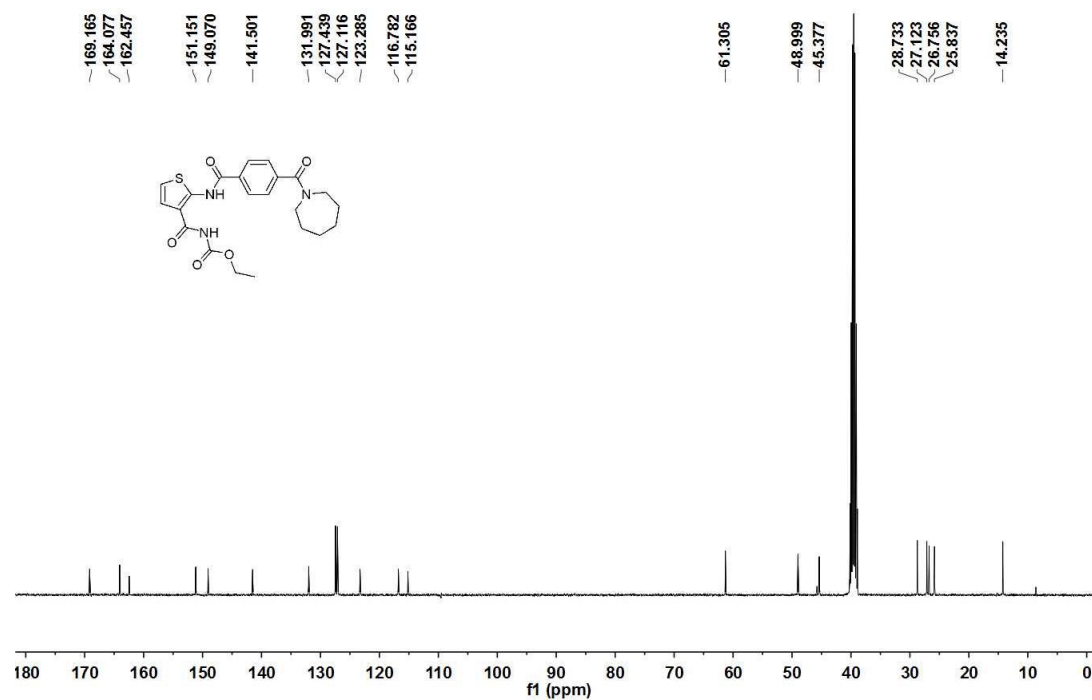

Figure S22. <sup>13</sup>C NMR spectrum of 23k.

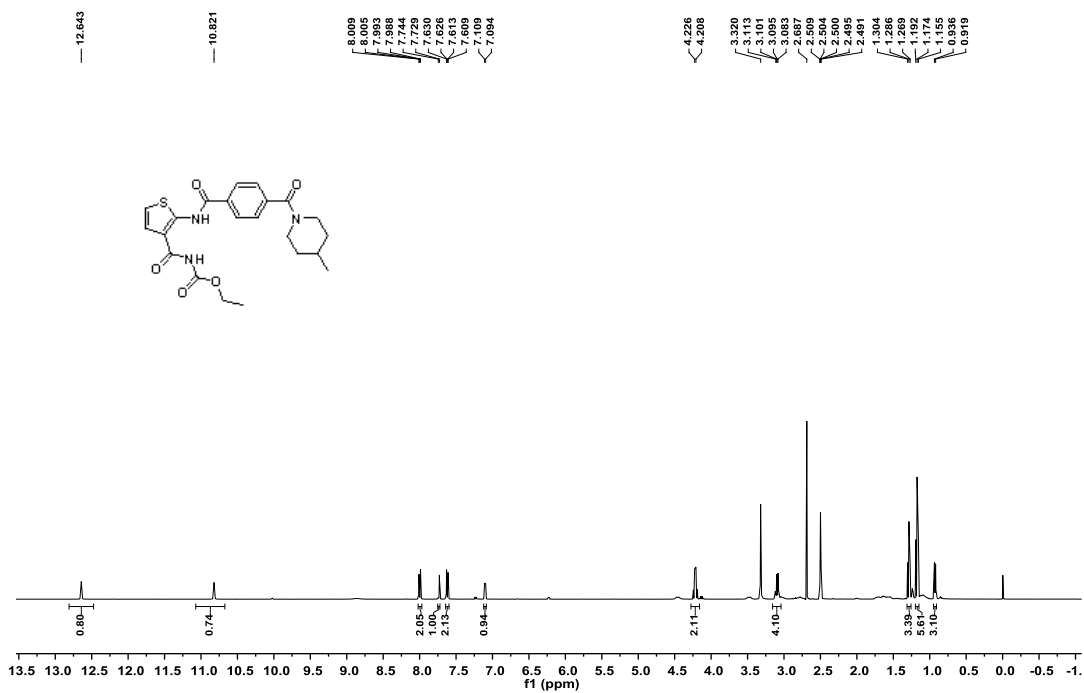

Figure S23. <sup>1</sup>H NMR spectrum of 231.

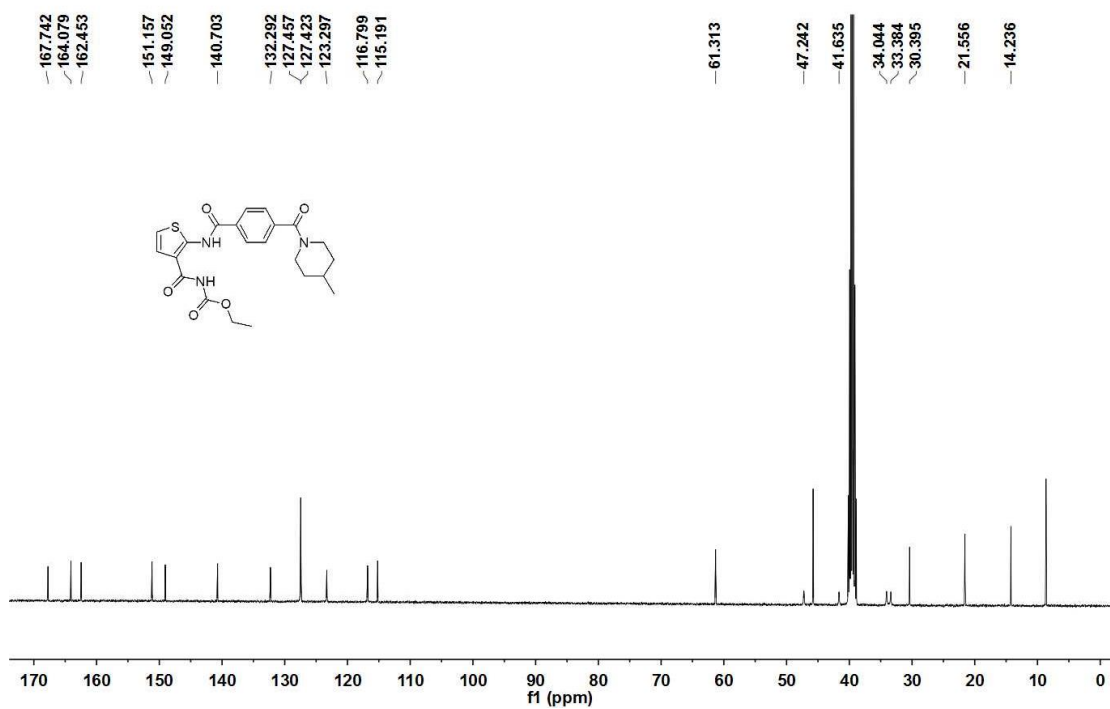

Figure S24. <sup>13</sup>C NMR spectrum of 231.

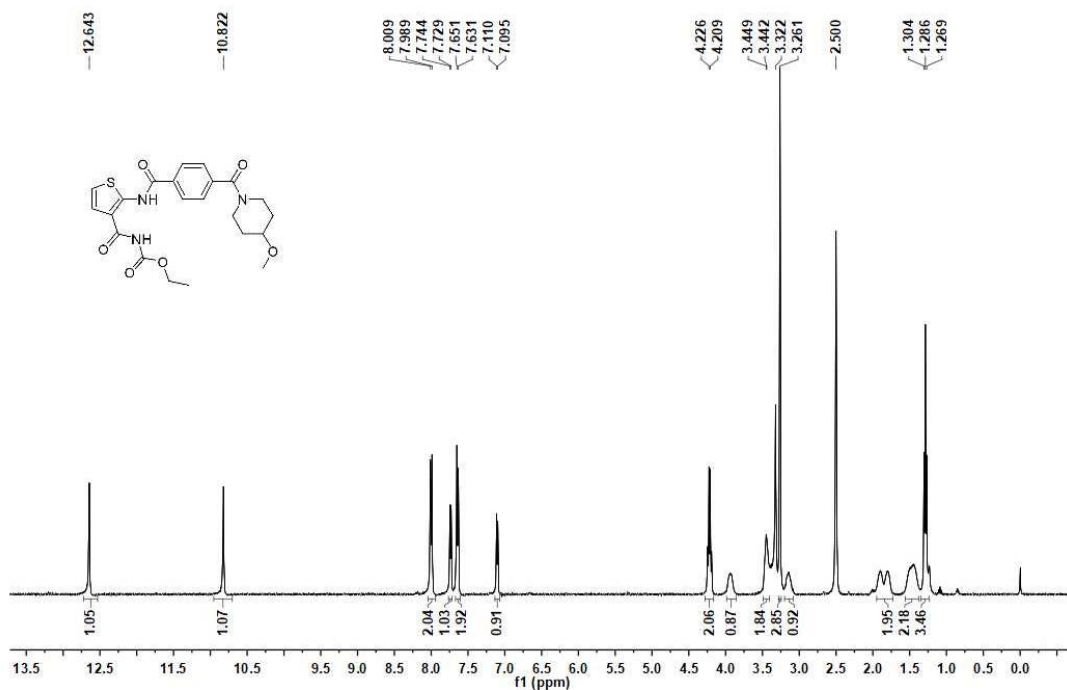

Figure S25. <sup>1</sup>H NMR spectrum of 23m.

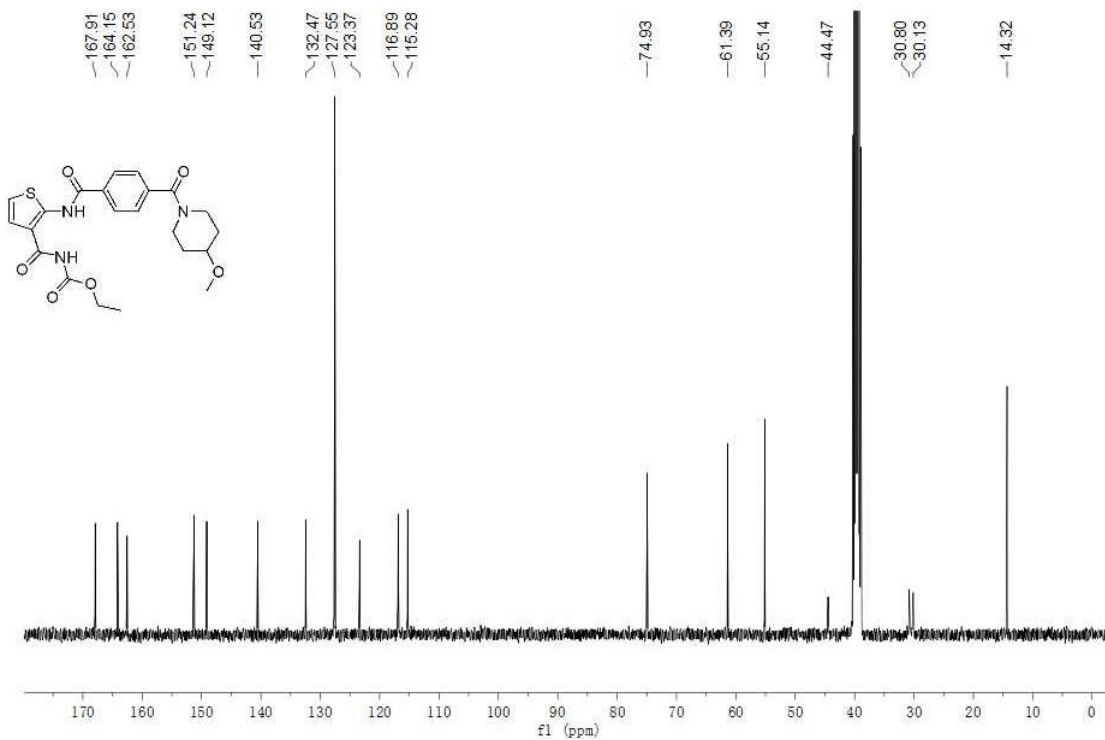

Figure S26. <sup>13</sup>C NMR spectrum of 23m.

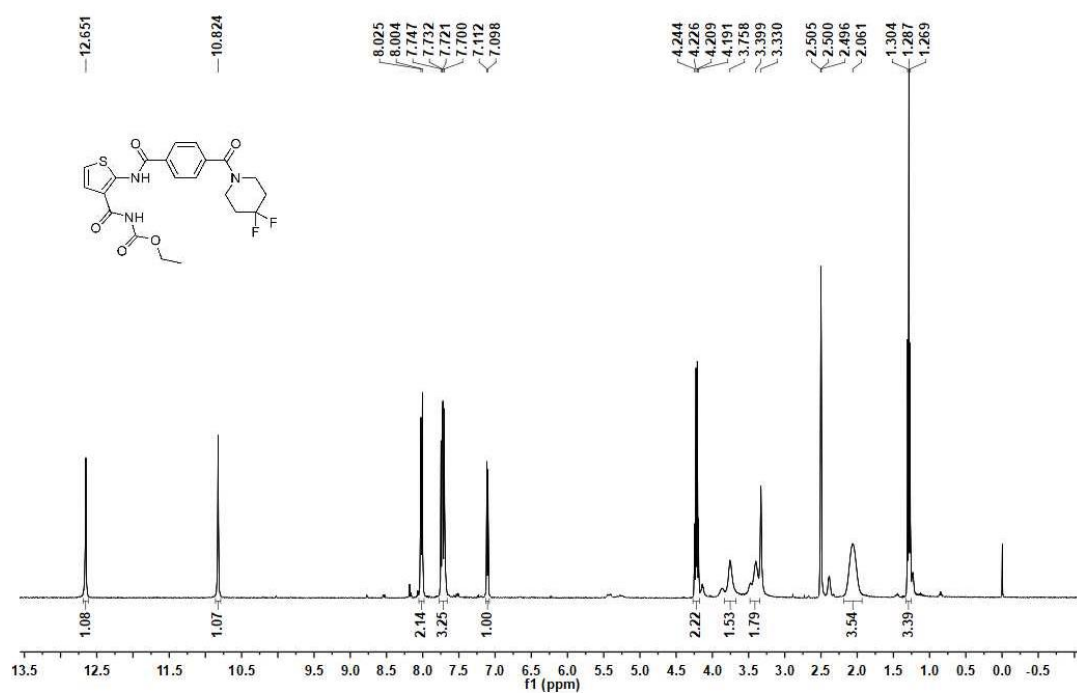

Figure S27. <sup>1</sup>H NMR spectrum of 23n.

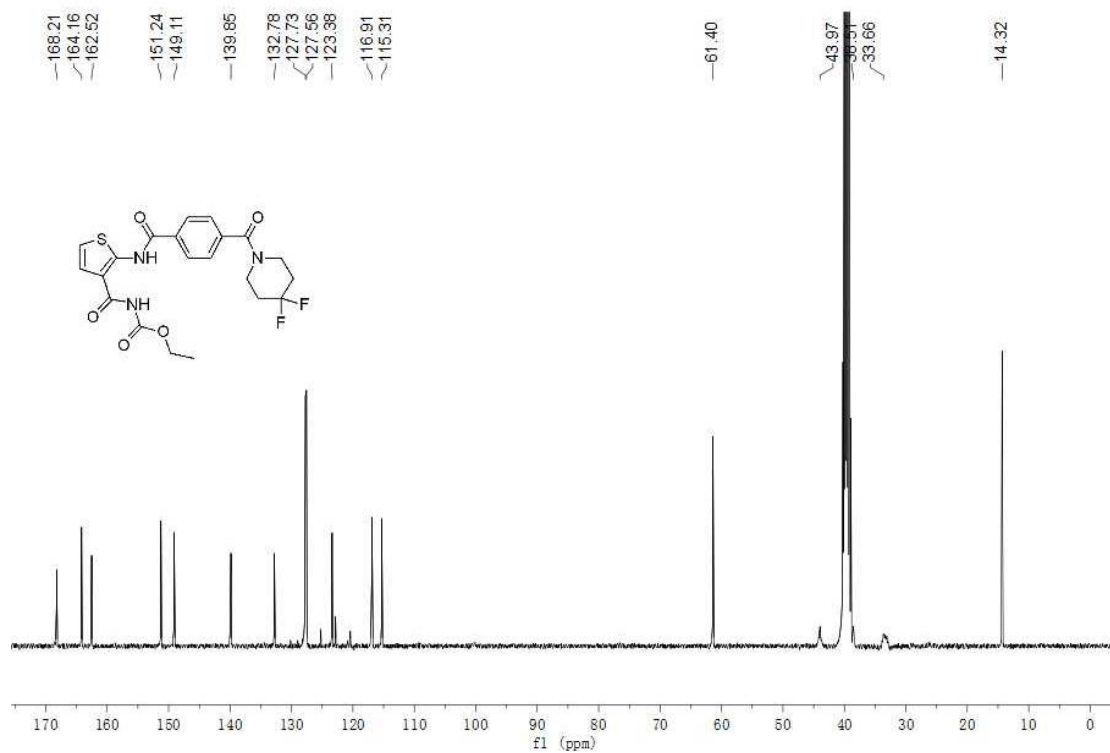

Figure S28. <sup>13</sup>C NMR spectrum of 23n.

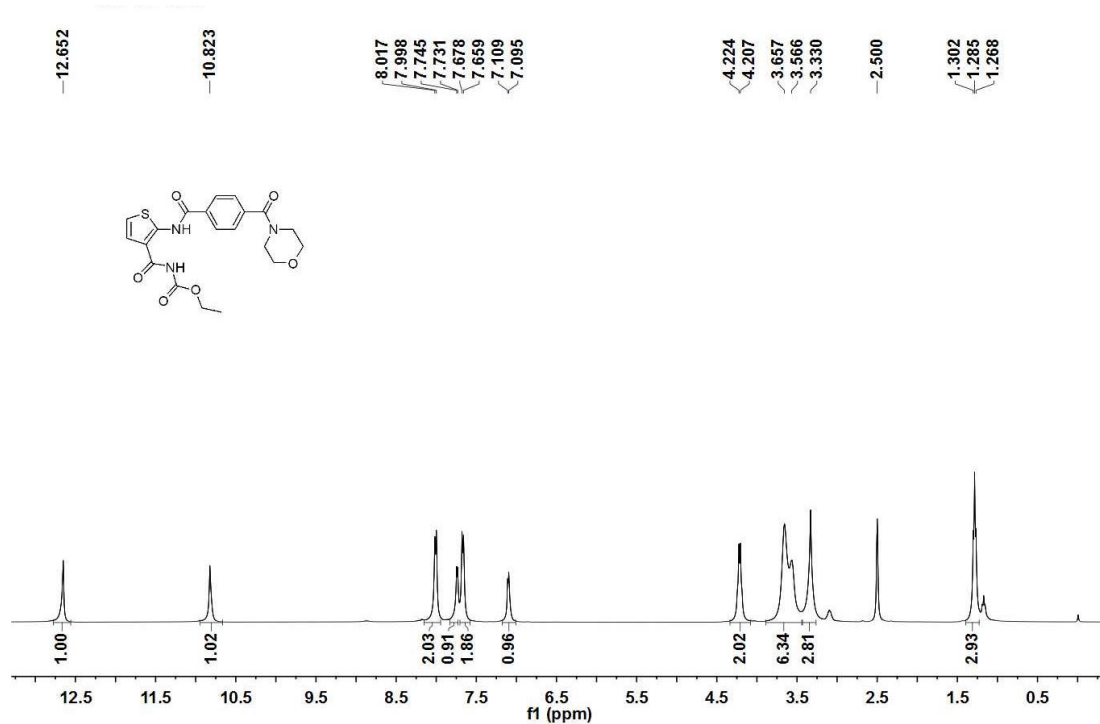

Figure S29. <sup>1</sup>H NMR spectrum of 23o.

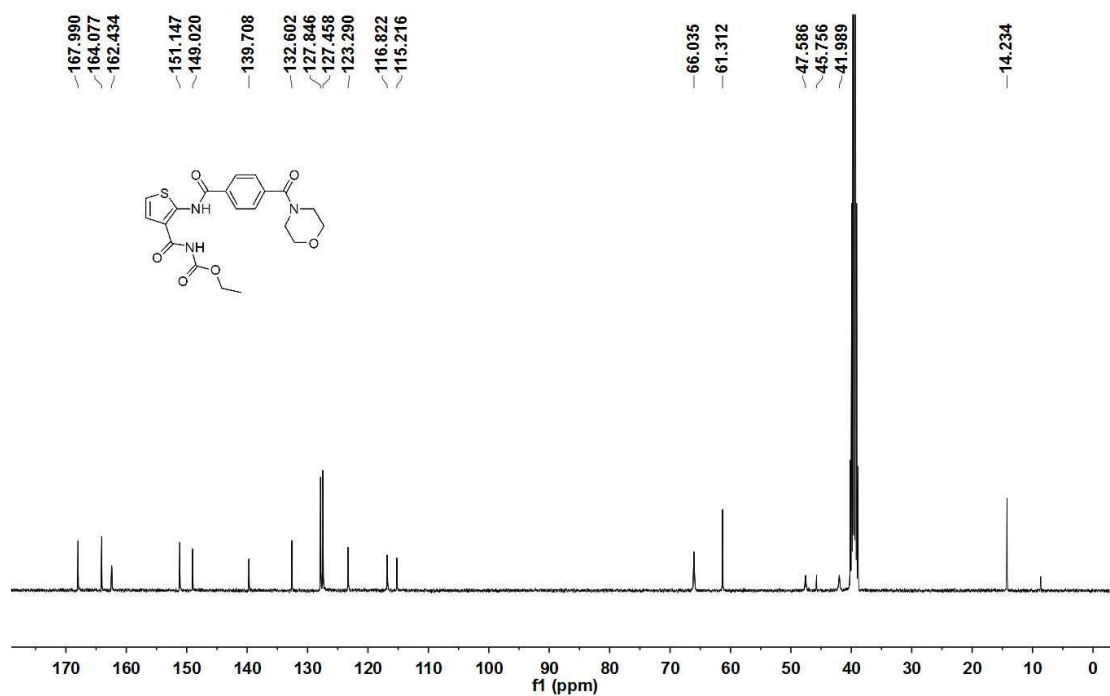

Figure S30. <sup>13</sup>C NMR spectrum of 23o.



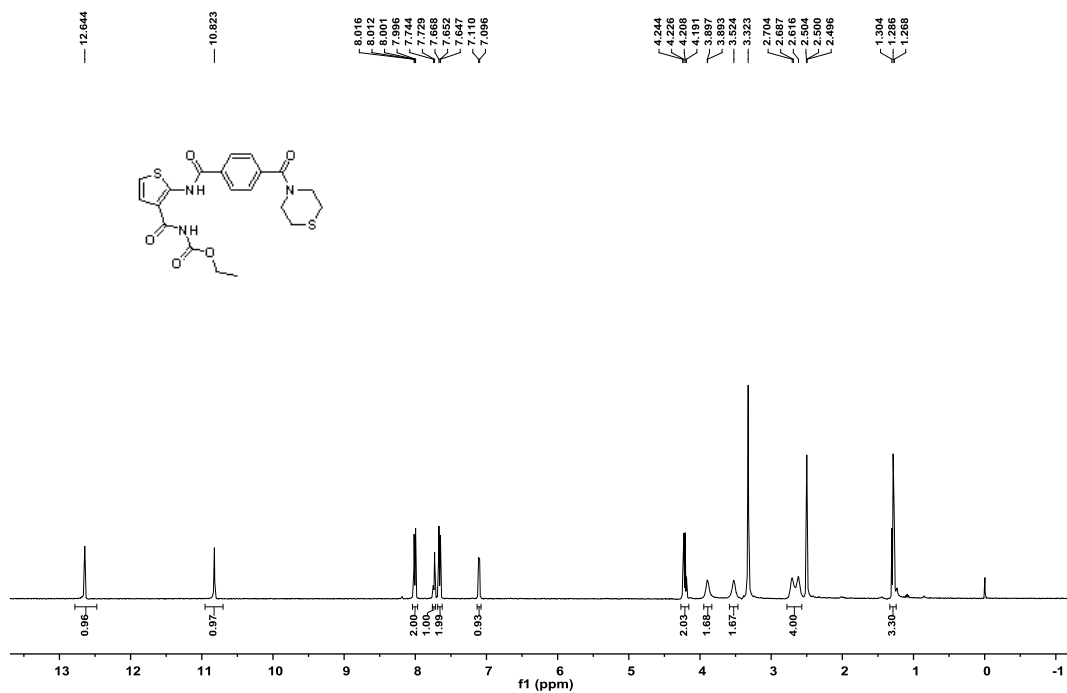

Figure S31. <sup>1</sup>H NMR spectrum of 23p.

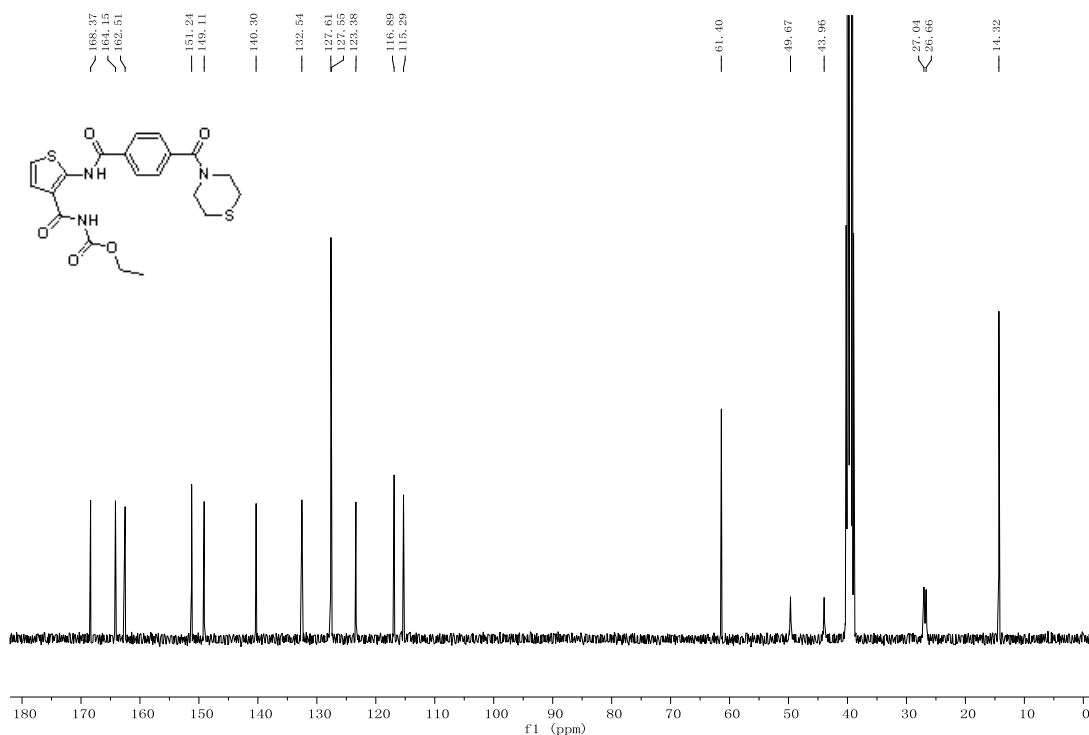

Figure S32. <sup>13</sup>C NMR spectrum of 23p.

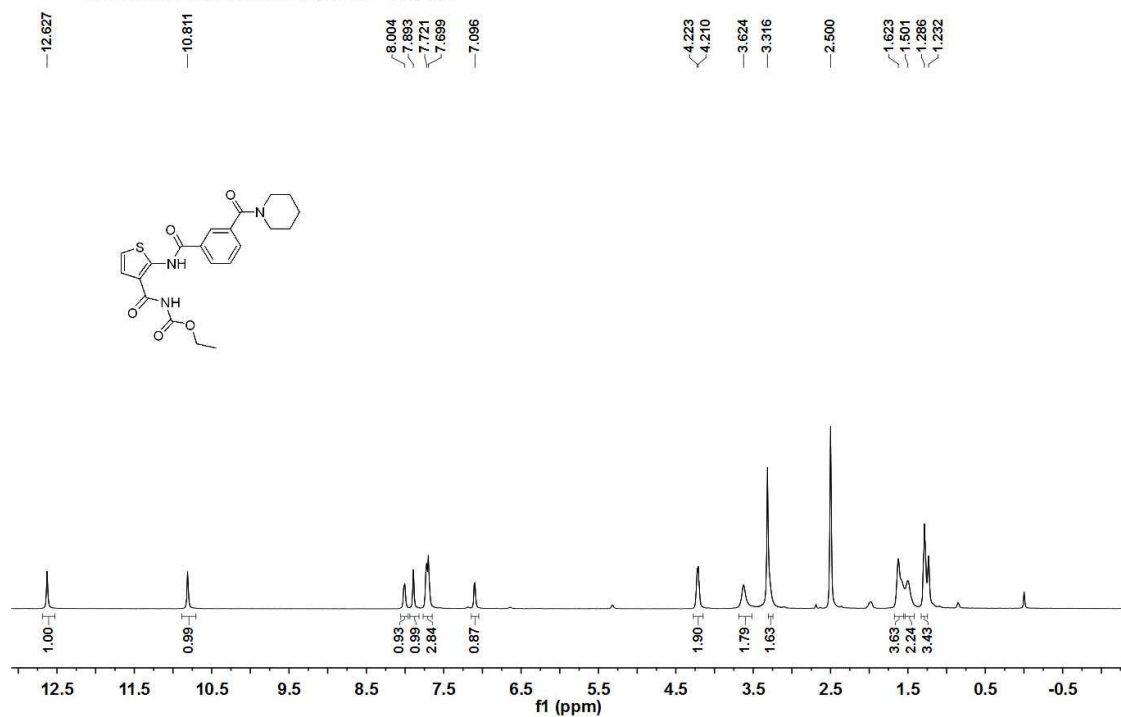

Figure S33. <sup>1</sup>H NMR spectrum of 24a.

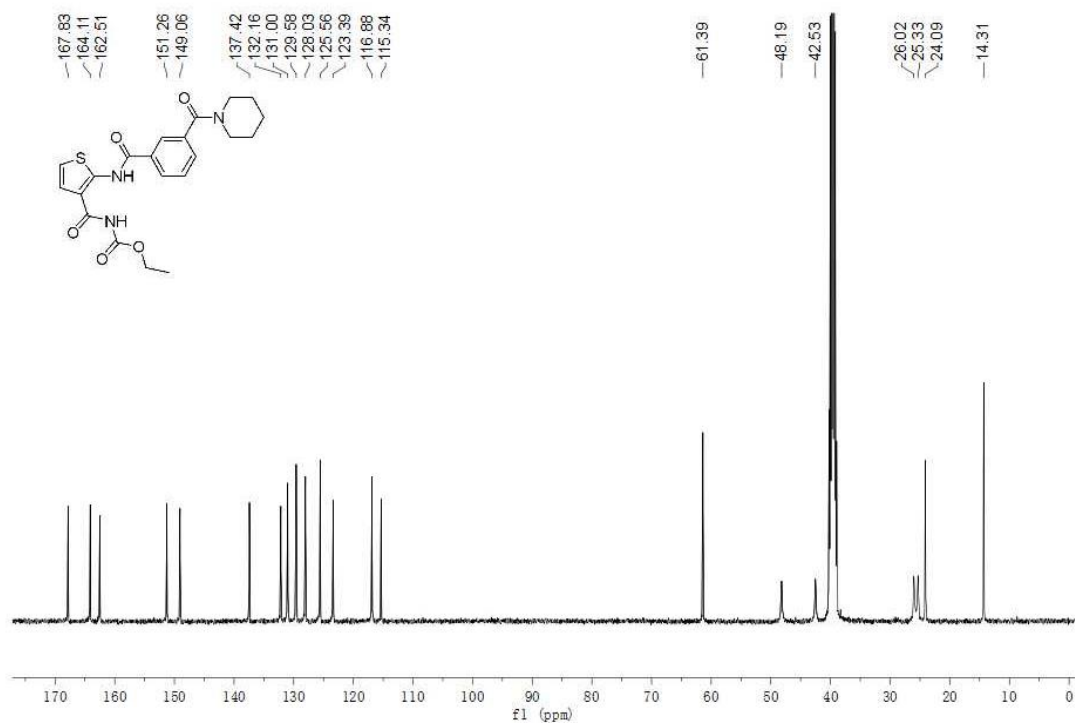

Figure S34. <sup>13</sup>C NMR spectrum of 24a.

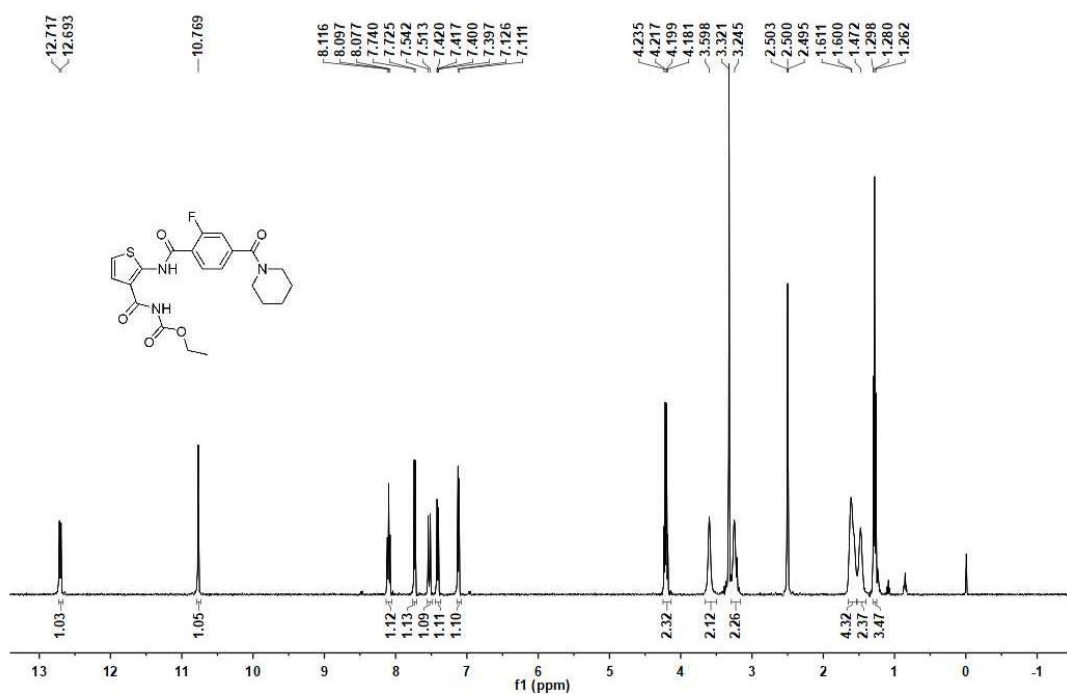

Figure S35.  $^1\text{H}$  NMR spectrum of 24b.

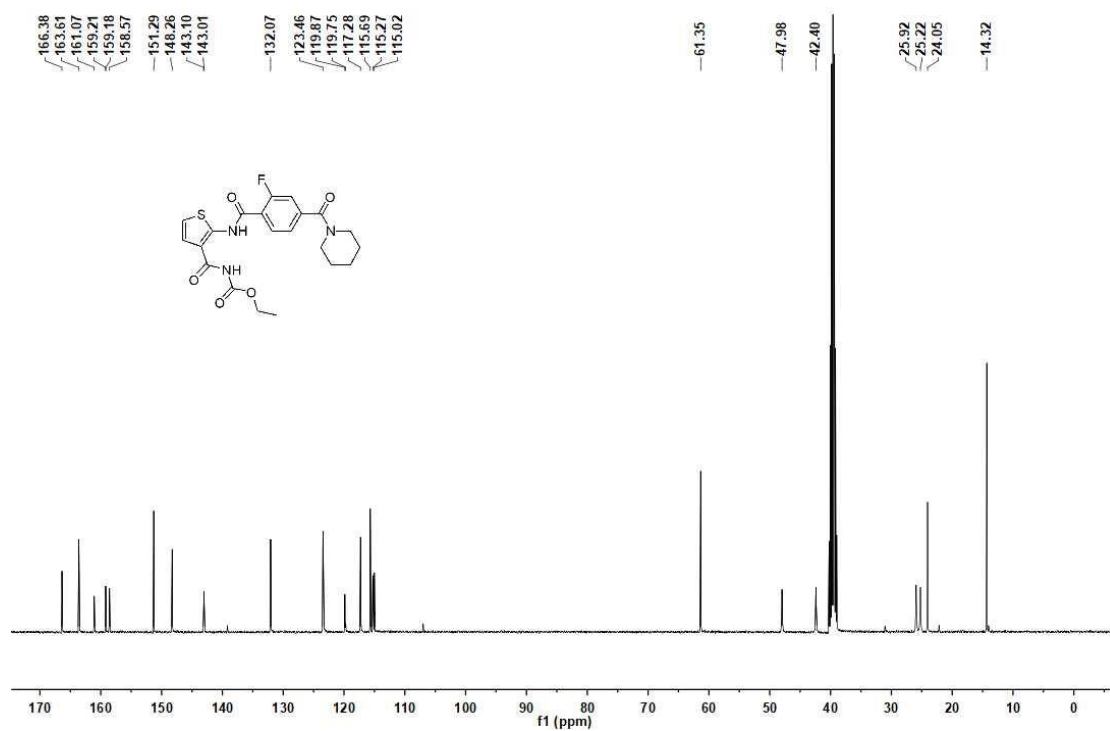

Figure S36.  $^{13}\text{C}$  NMR spectrum of 24b.

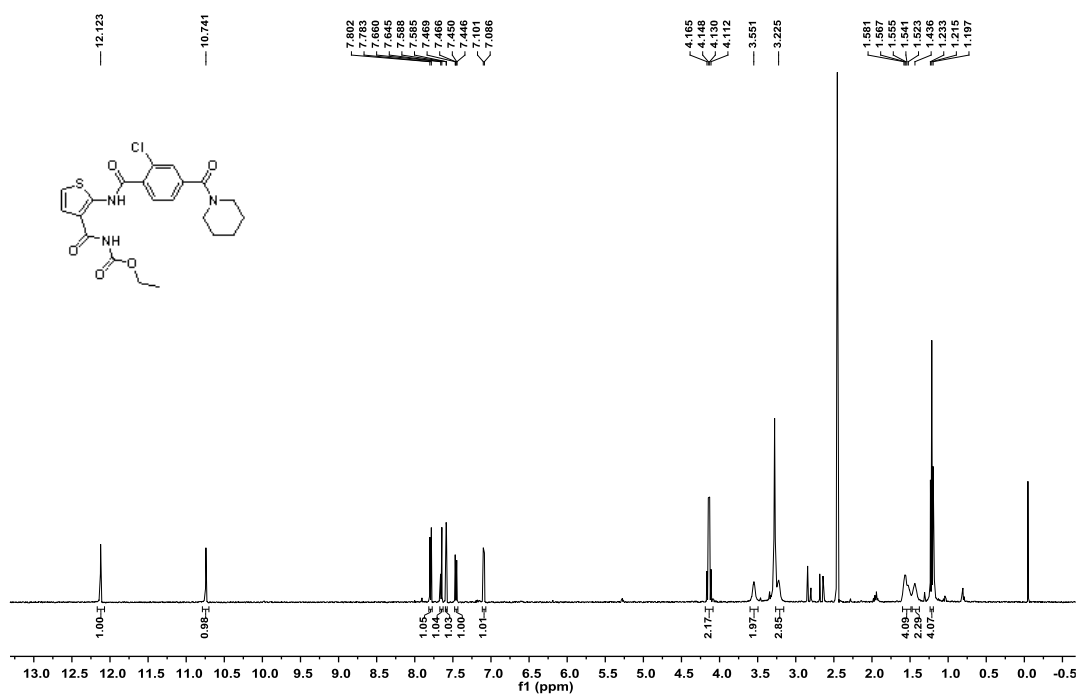

Figure S37. <sup>1</sup>H NMR spectrum of 24c.

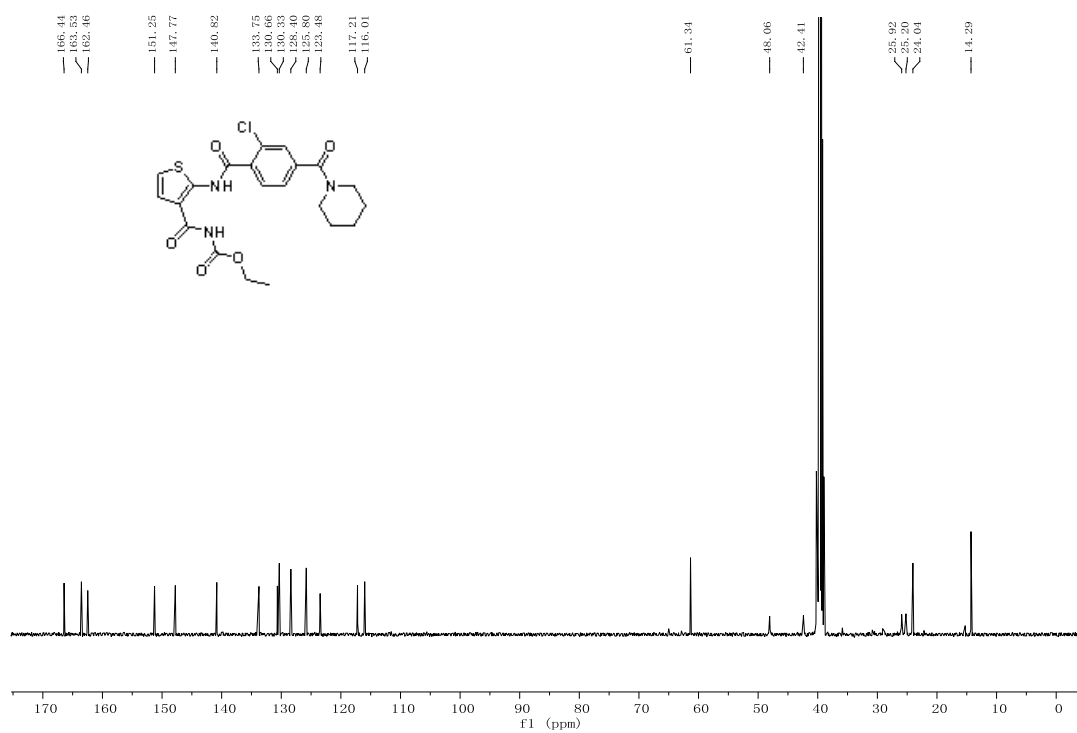

Figure S38. <sup>13</sup>C NMR spectrum of 24c.

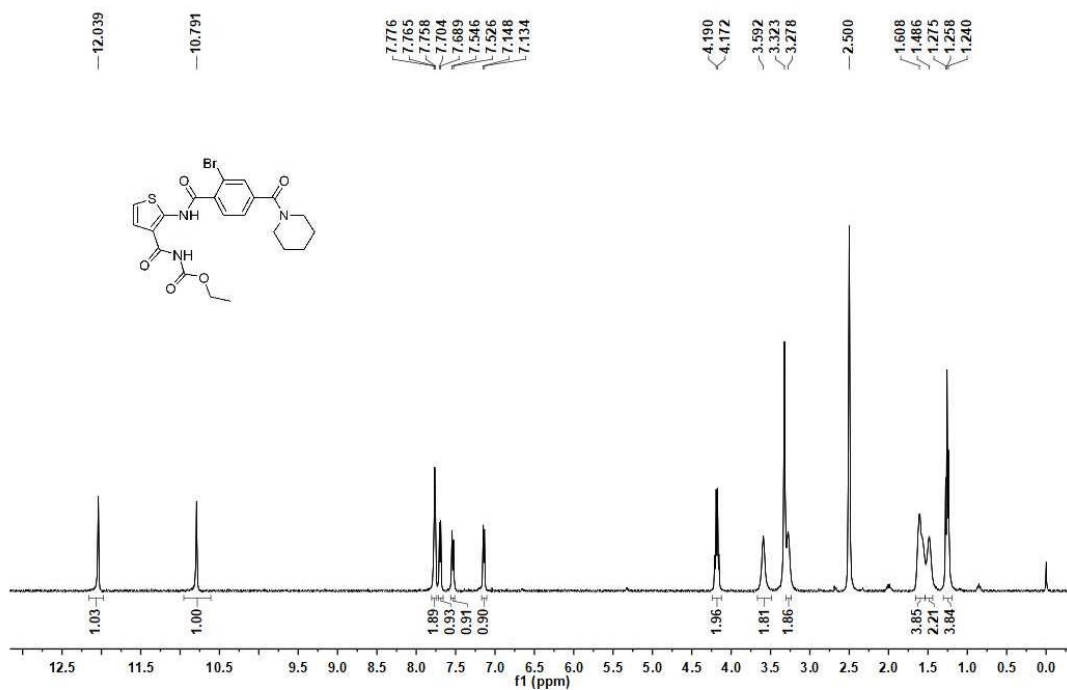

Figure S39. <sup>1</sup>H NMR spectrum of 24d.

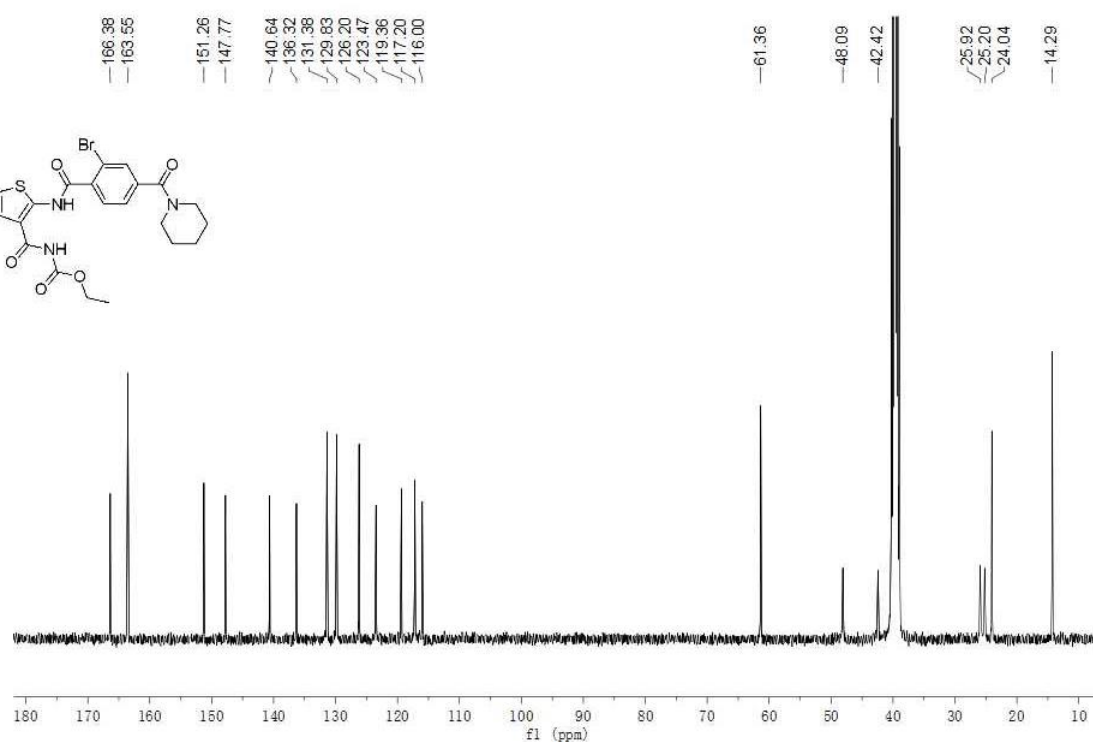

Figure S40. <sup>13</sup>C NMR spectrum of 24d.

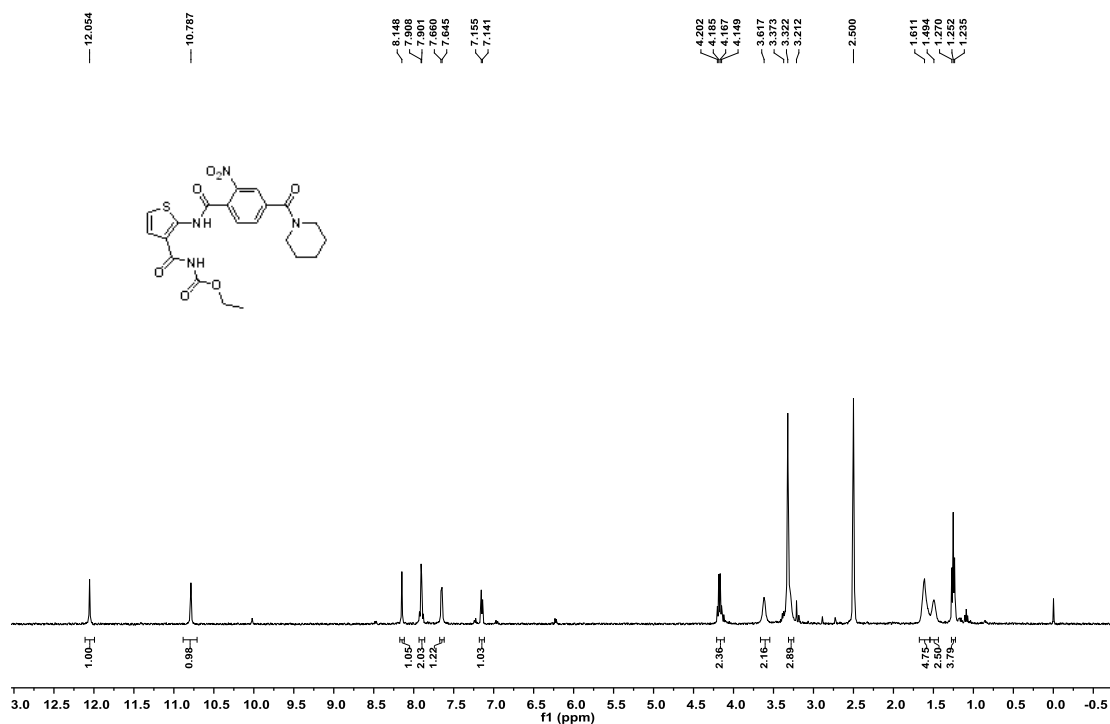

Figure S41. <sup>1</sup>H NMR spectrum of 24e.

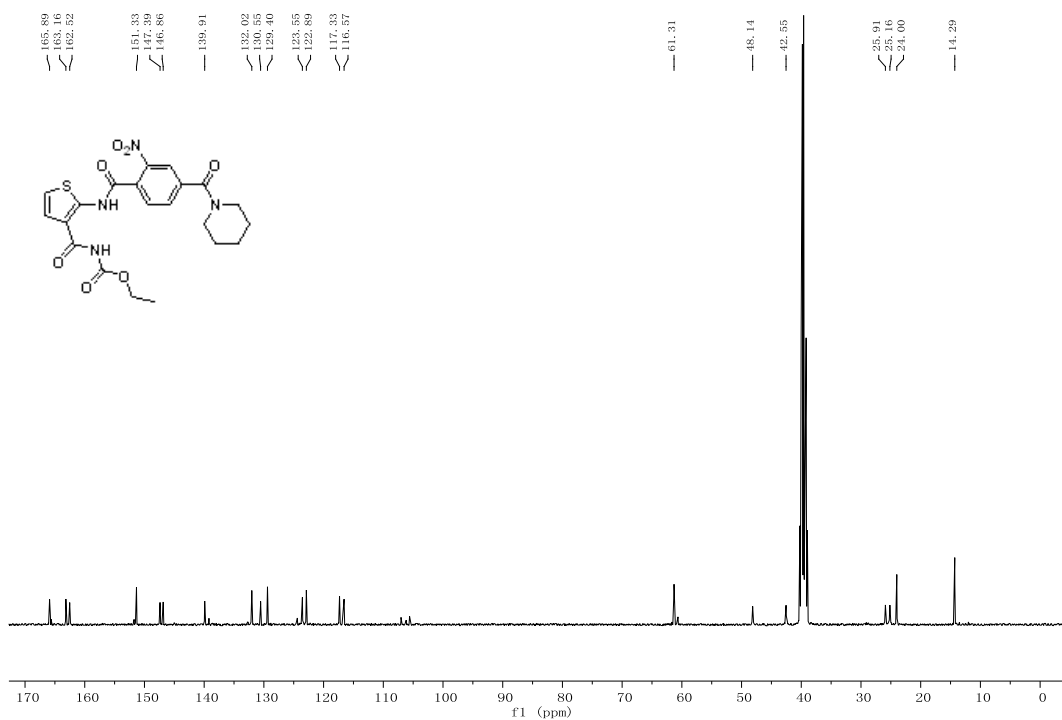

Figure S42. <sup>13</sup>C NMR spectrum of 24e.

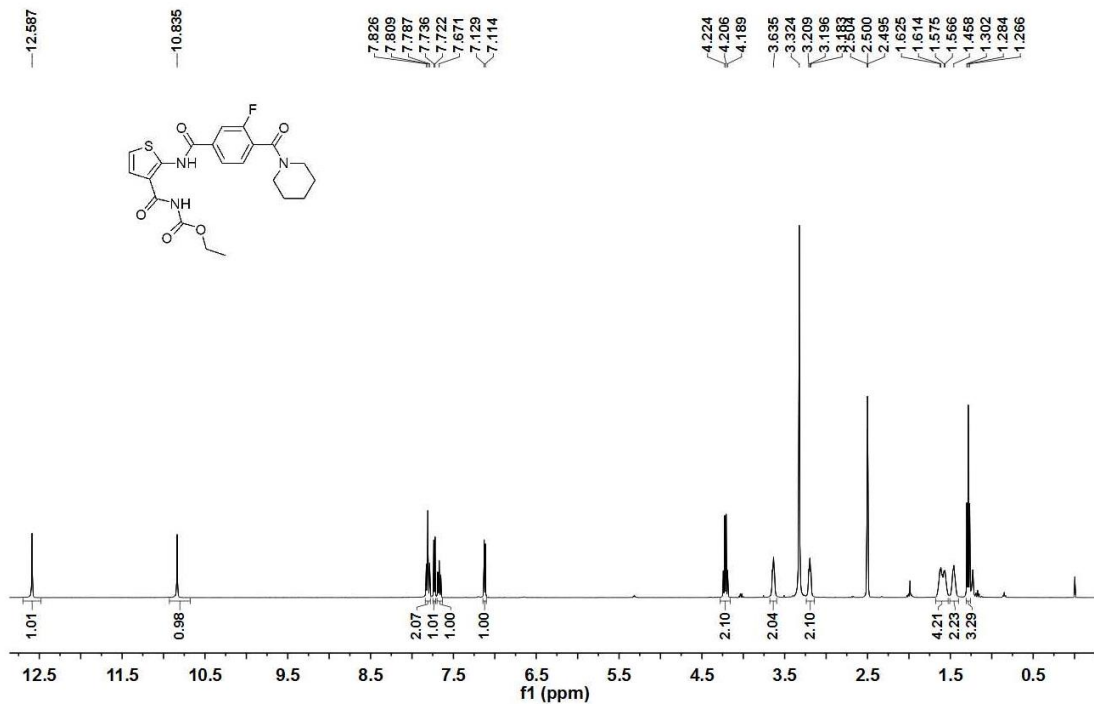

Figure S43.  $^1\text{H}$  NMR spectrum of 24f.

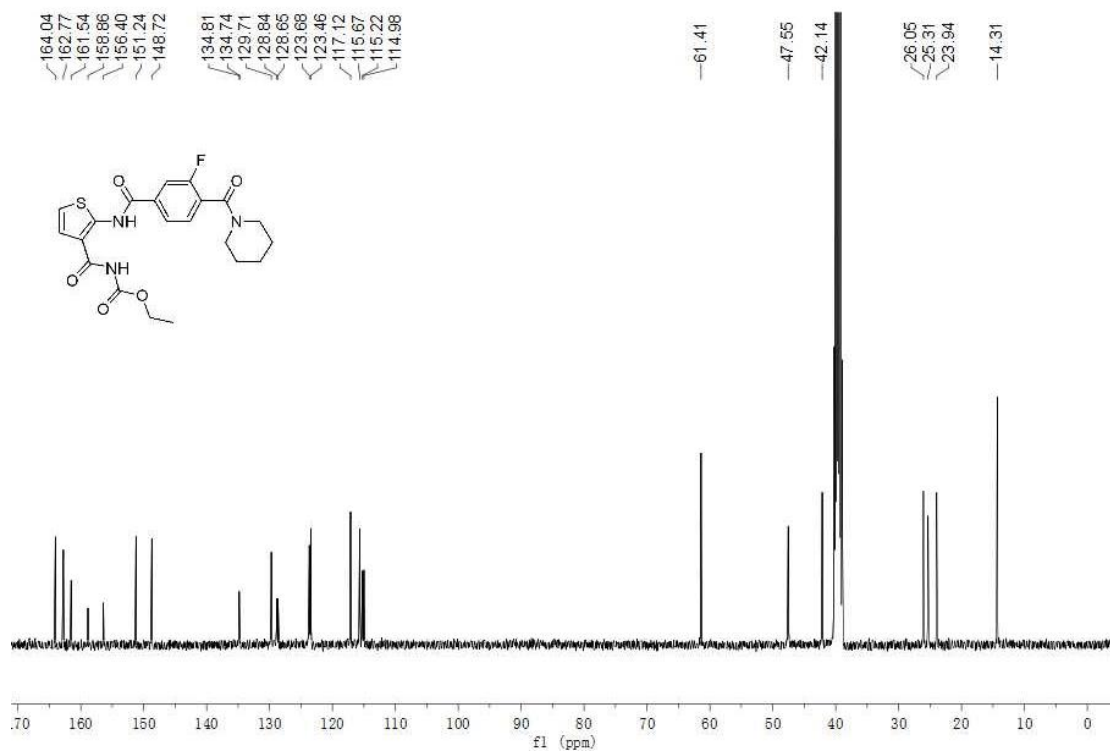

Figure S44.  $^{13}\text{C}$  NMR spectrum of 24f.

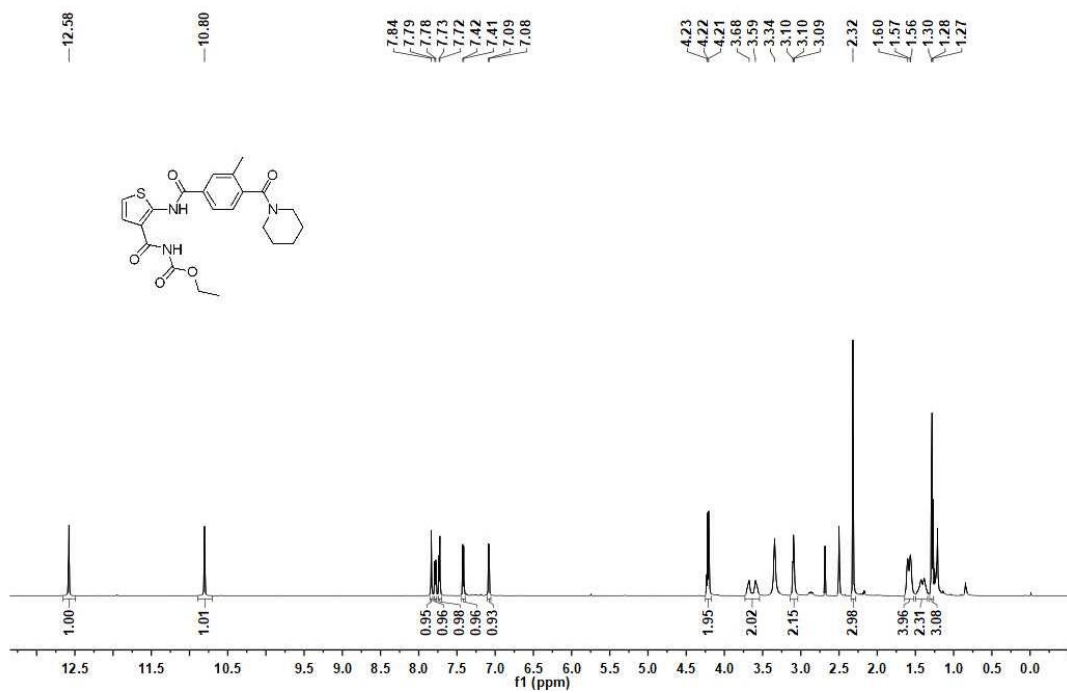

Figure S45. <sup>1</sup>H NMR spectrum of 24g.

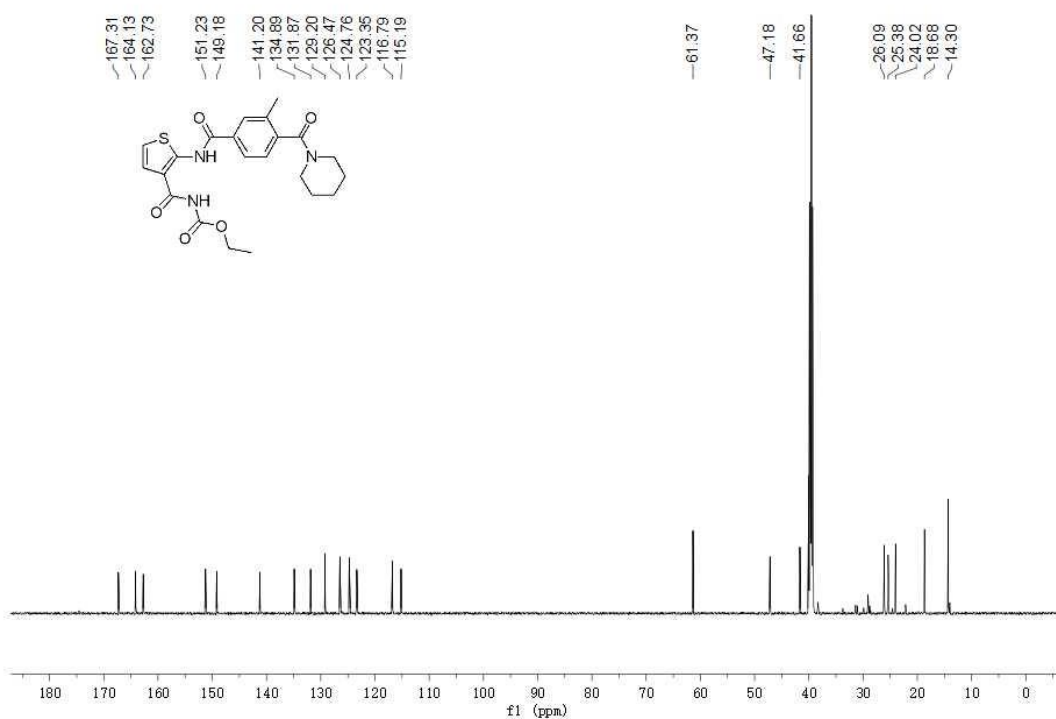

Figure S46. <sup>13</sup>C NMR spectrum of 24g.



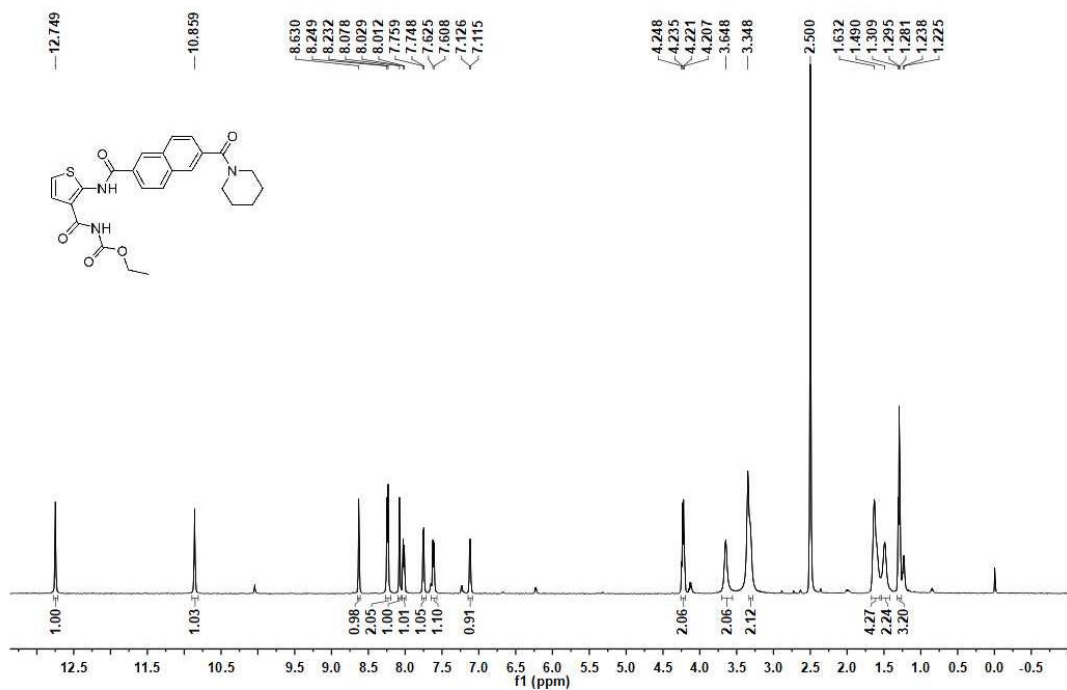

Figure S47. <sup>1</sup>H NMR spectrum of 24h.

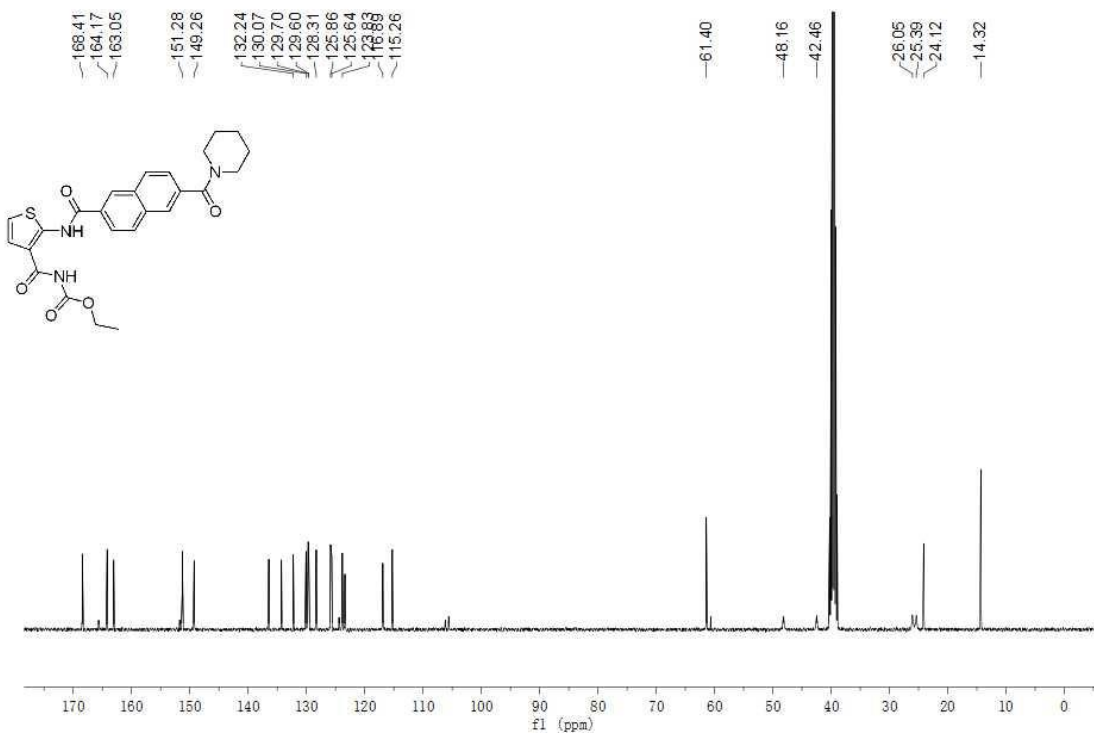

Figure S48. <sup>13</sup>C NMR spectrum of 24h.

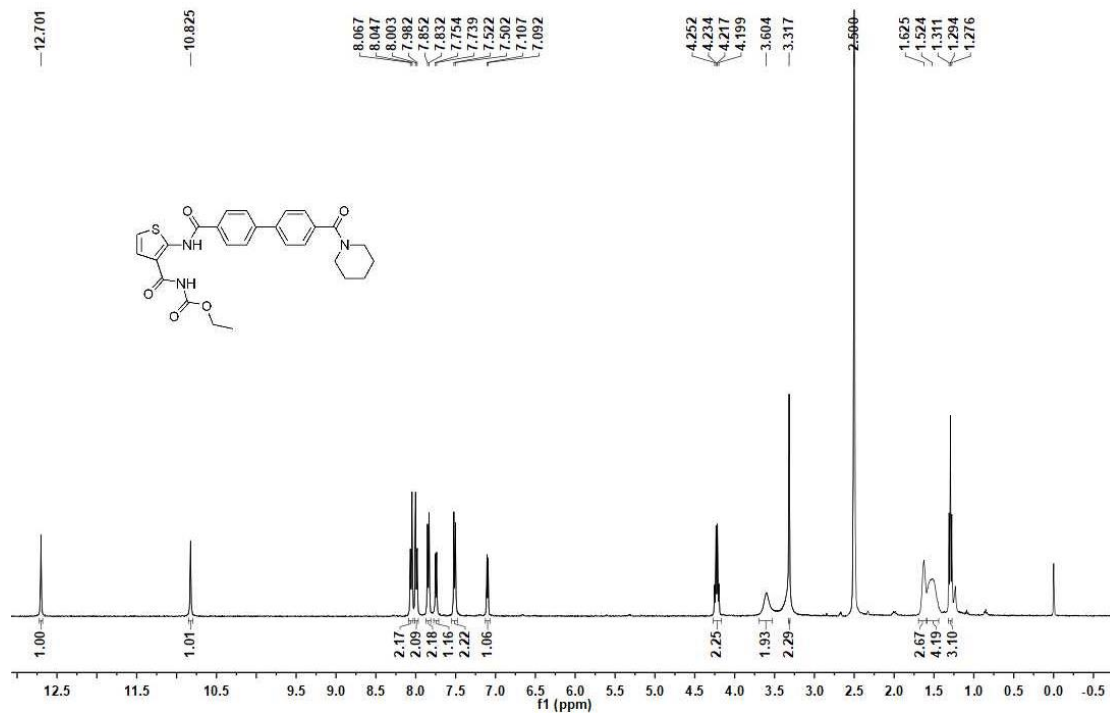

Figure S49. <sup>1</sup>H NMR spectrum of 24i.

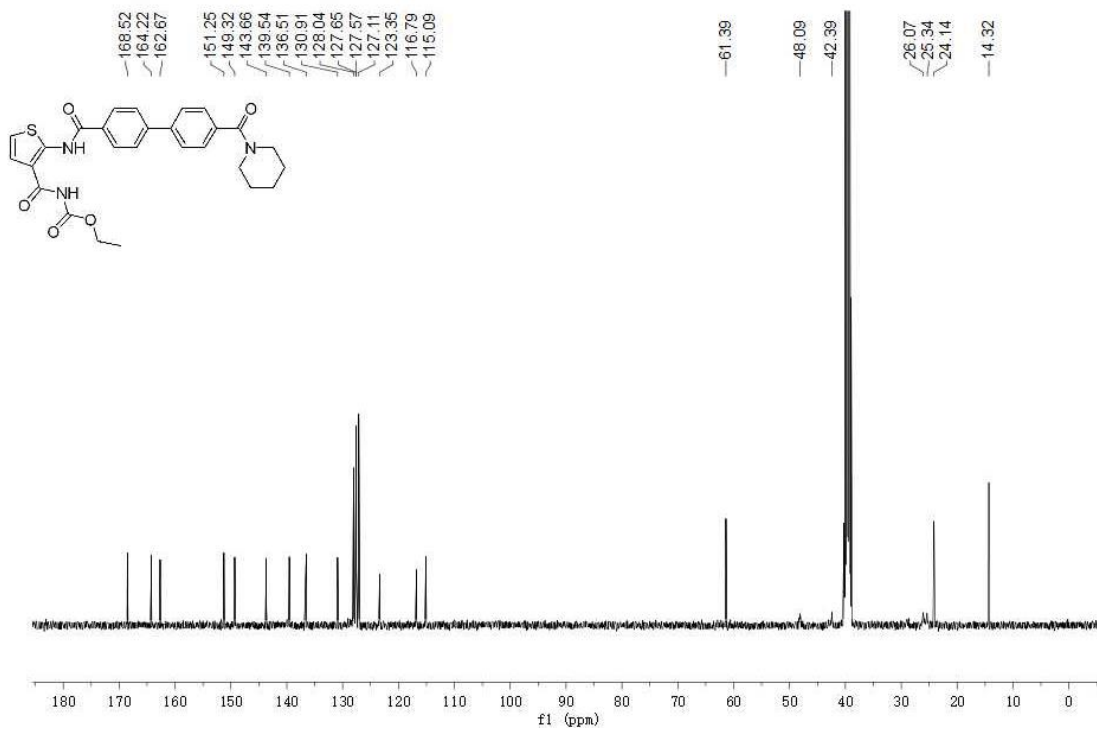

Figure S50. <sup>13</sup>C NMR spectrum of 24i.

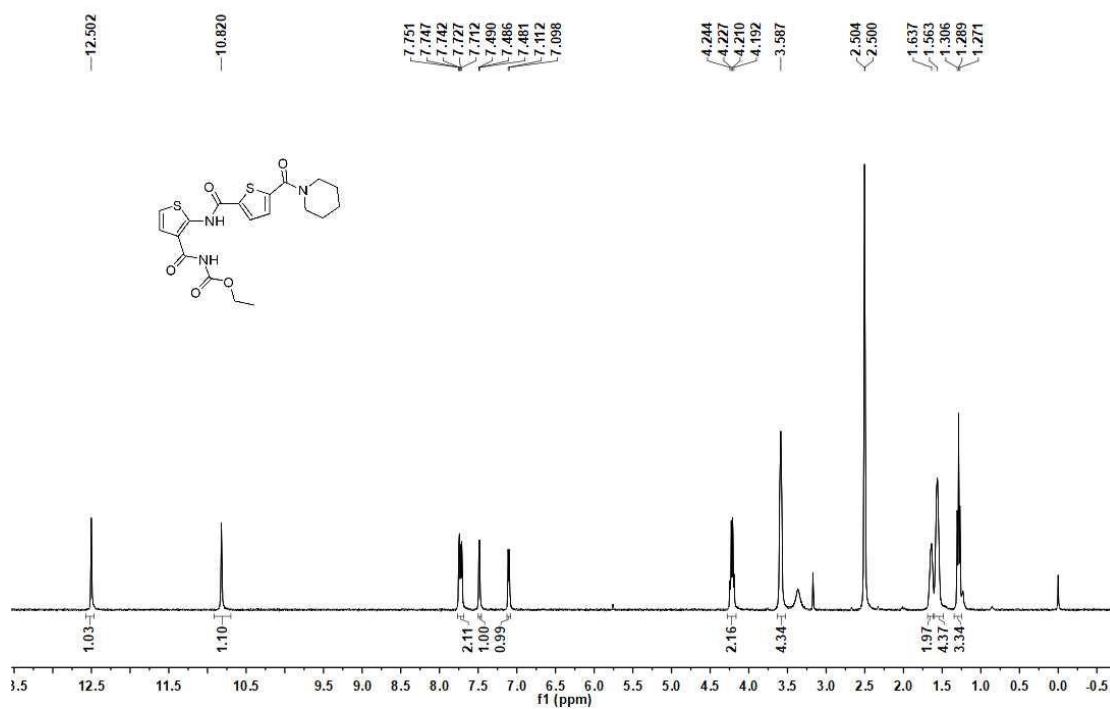

Figure S51. <sup>1</sup>H NMR spectrum of 24j.

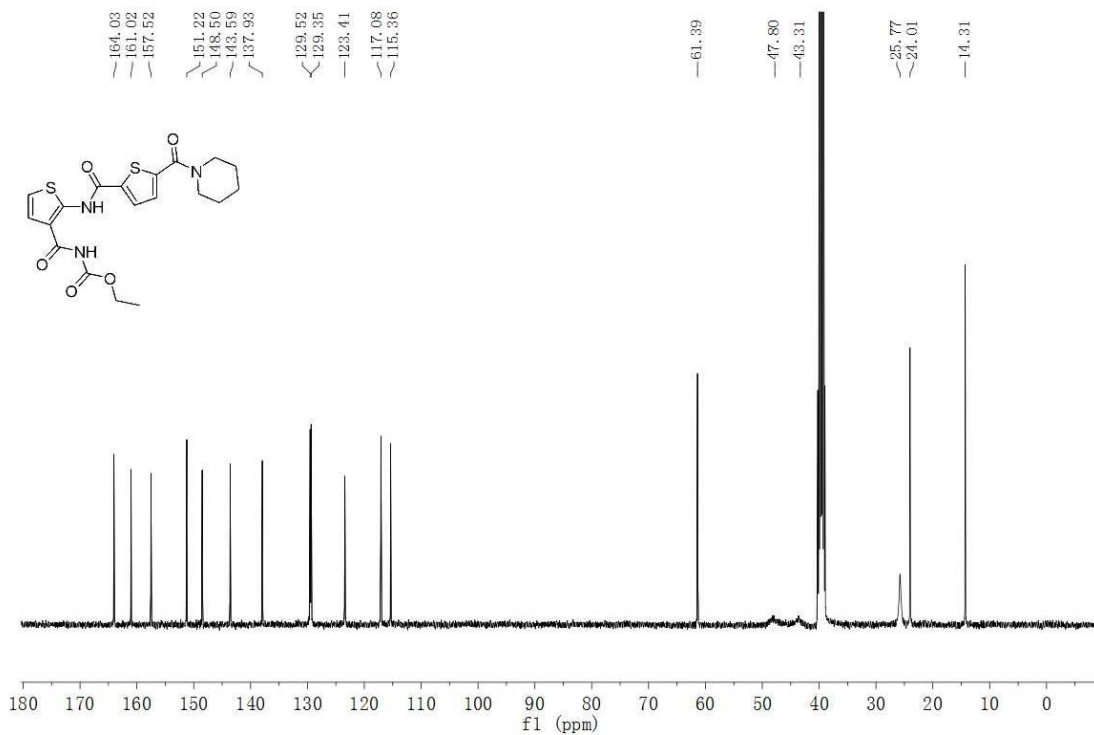

Figure S52. <sup>13</sup>C NMR spectrum of 24j.

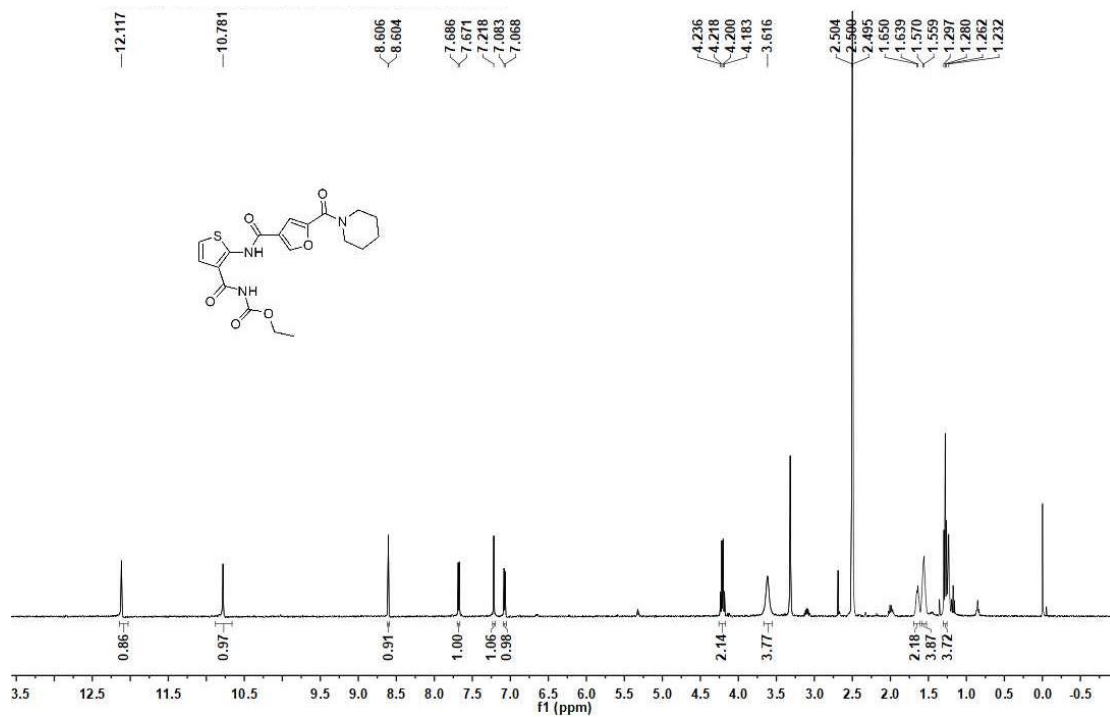

Figure S53. <sup>1</sup>H NMR spectrum of 24k.

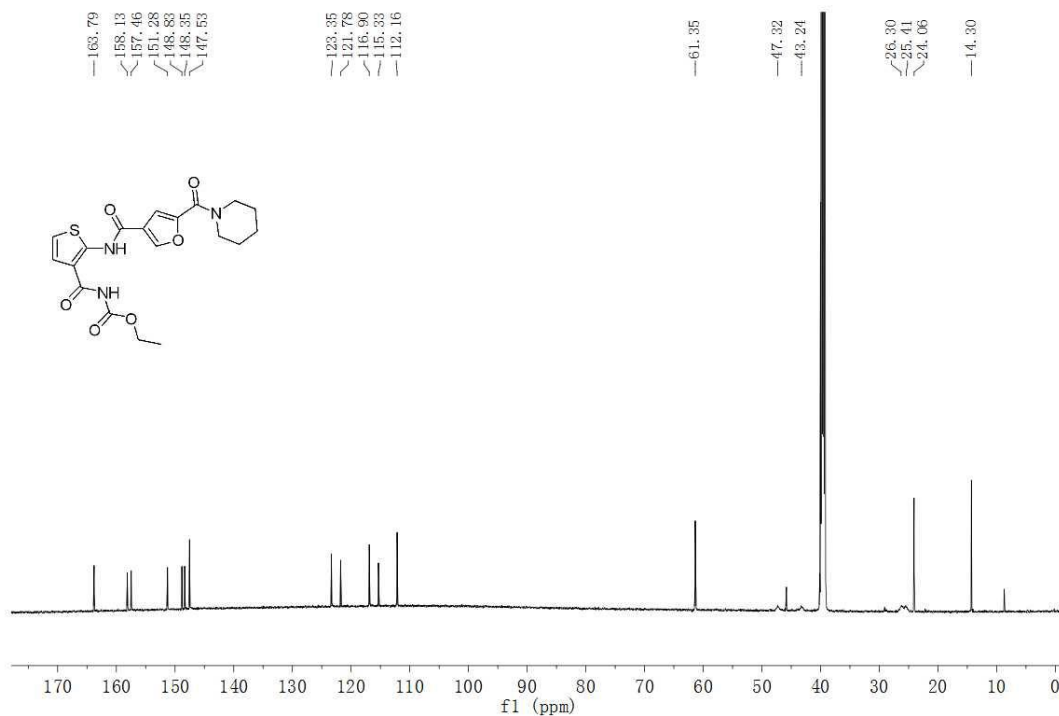

Figure S54. <sup>13</sup>C NMR spectrum of 24k.

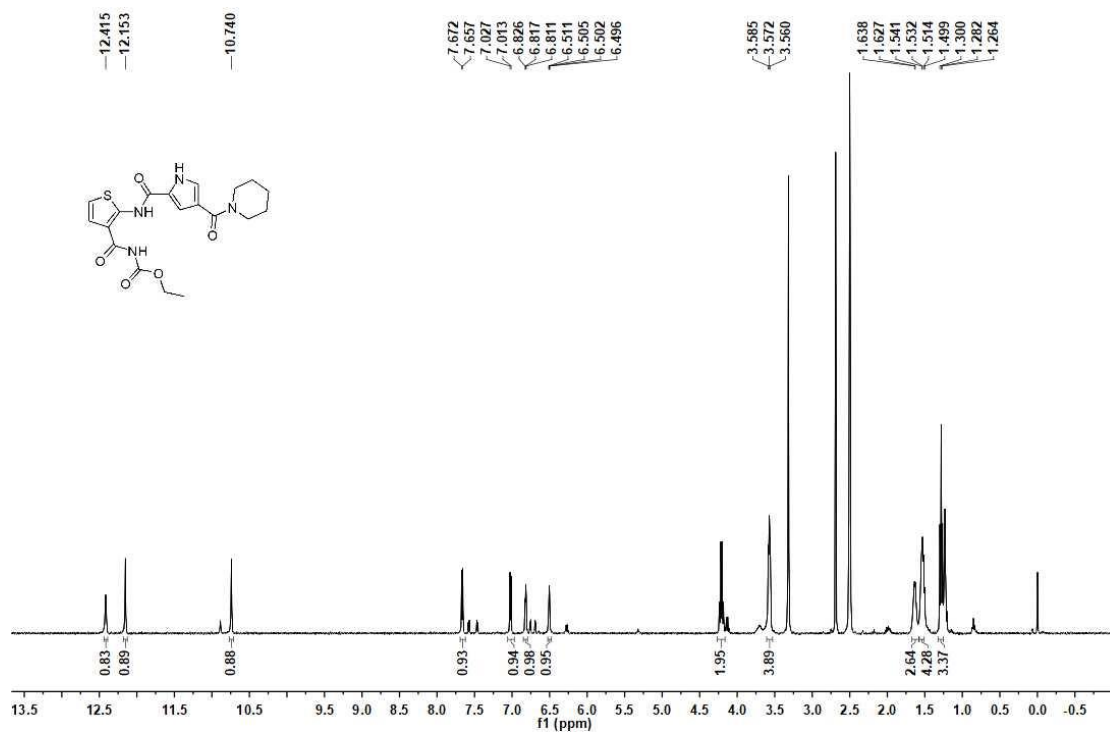

Figure S55. <sup>1</sup>H NMR spectrum of 241.

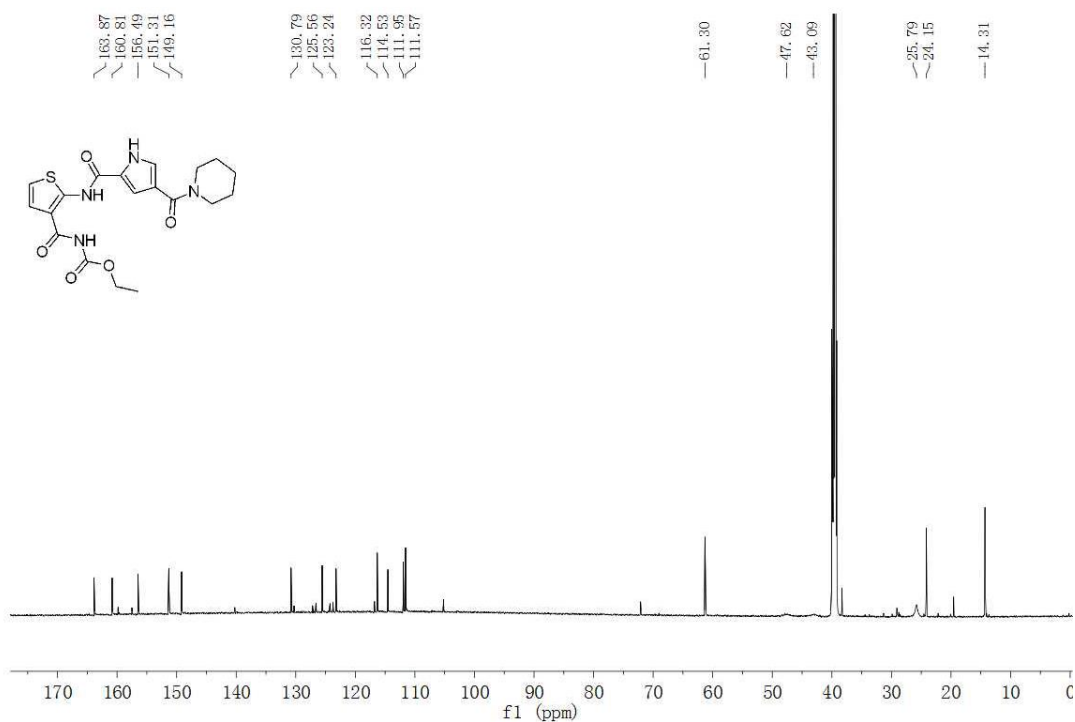

Figure S56. <sup>13</sup>C NMR spectrum of 241.

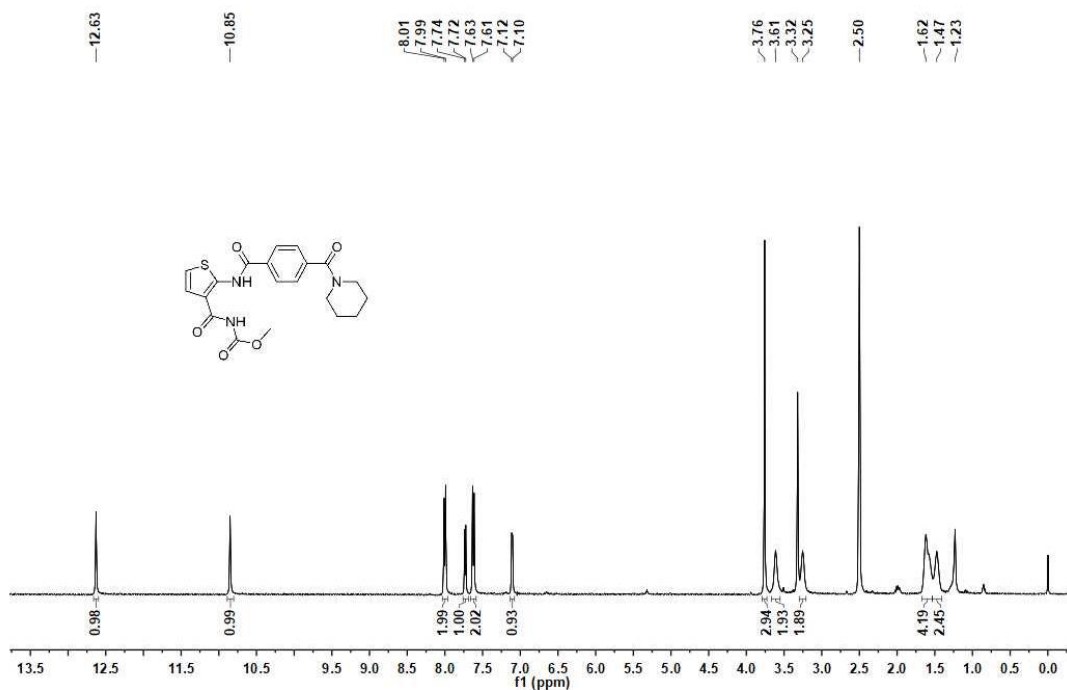

Figure S57. <sup>1</sup>H NMR spectrum of 25a.

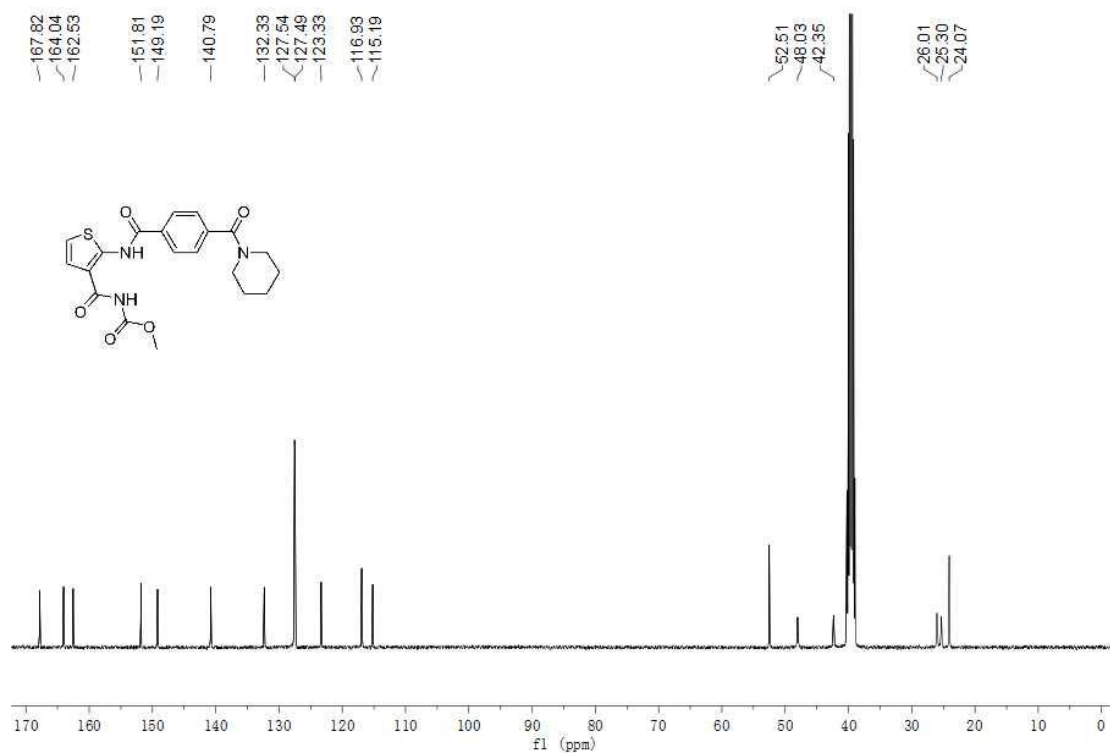

Figure S58. <sup>13</sup>C NMR spectrum of 25a.

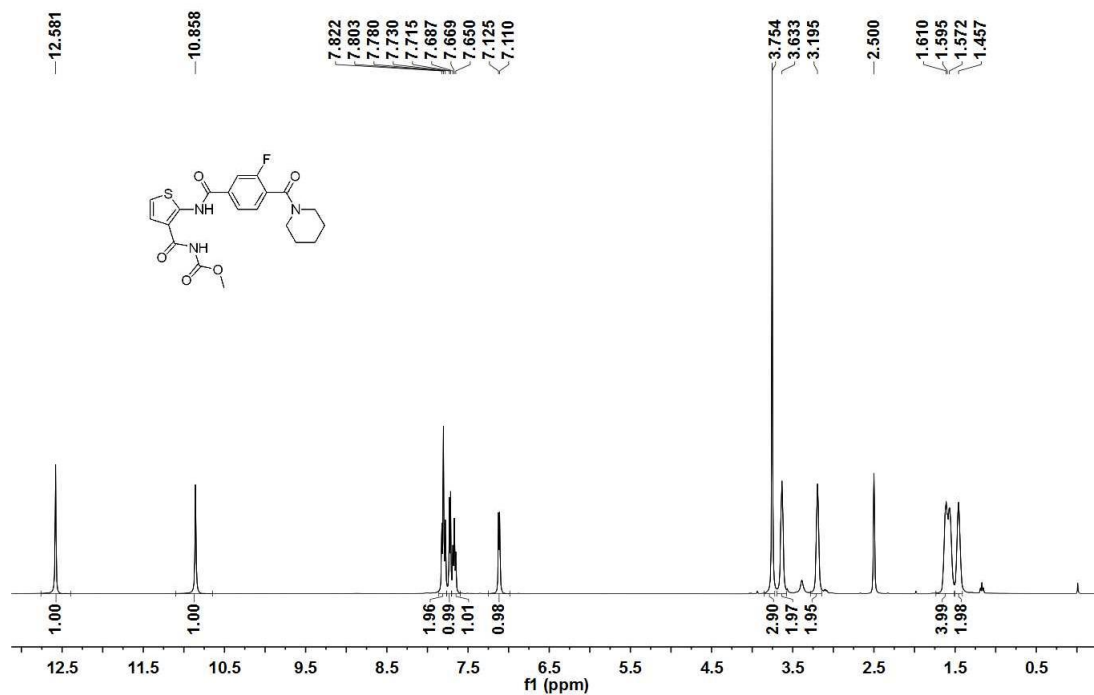

Figure S59. <sup>1</sup>H NMR spectrum of 25b.

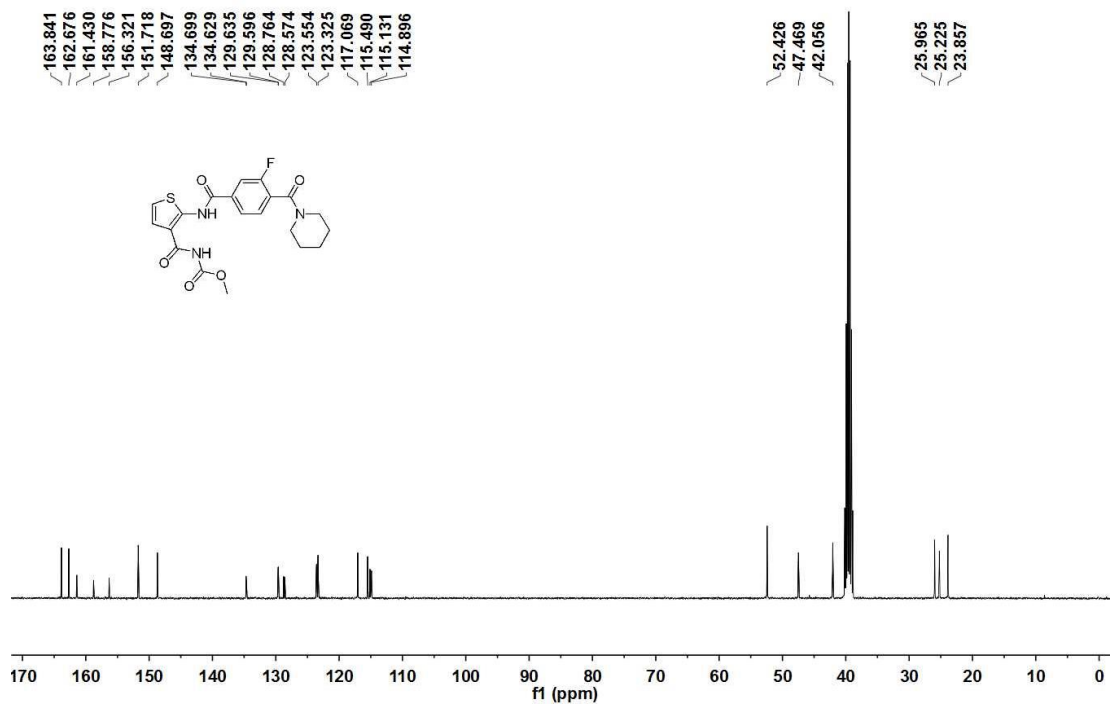

Figure S60. <sup>13</sup>C NMR spectrum of 25b.

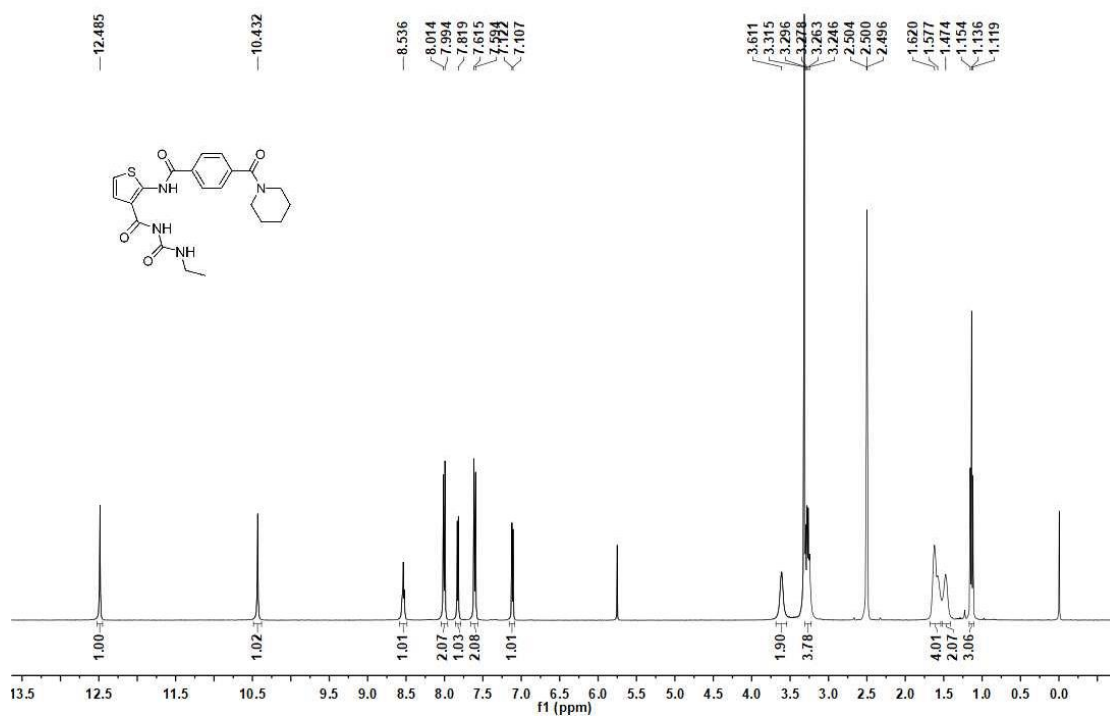

Figure S61. <sup>1</sup>H NMR spectrum of 25c.

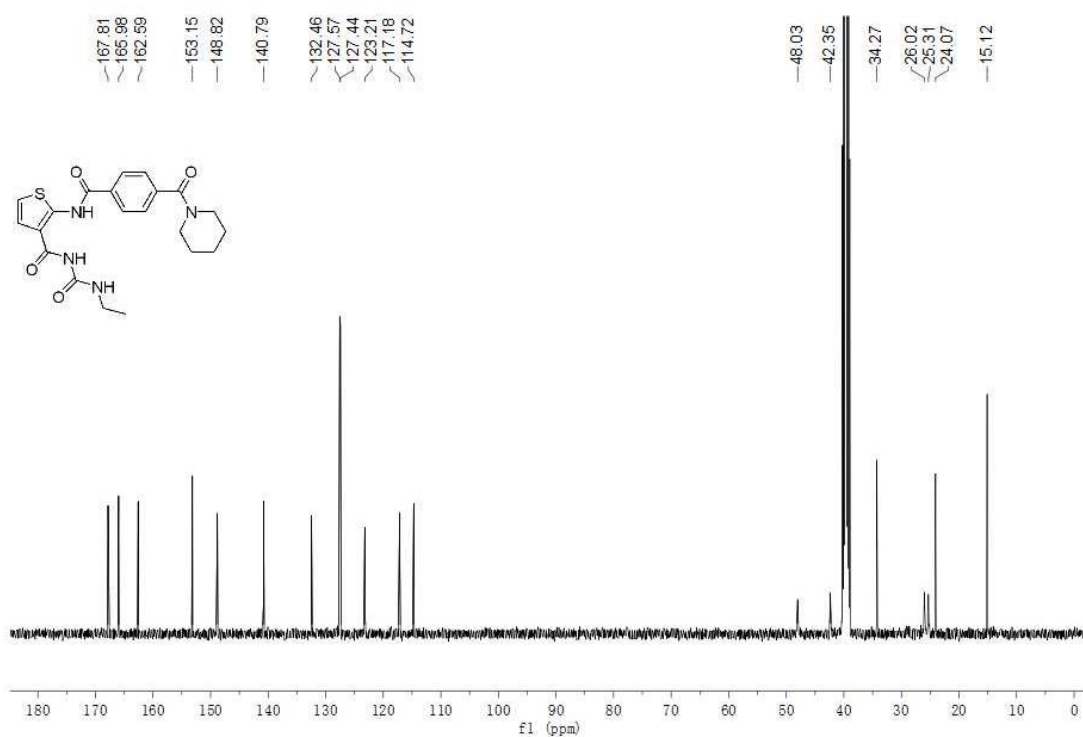

Figure S62. <sup>13</sup>C NMR spectrum of 25c.



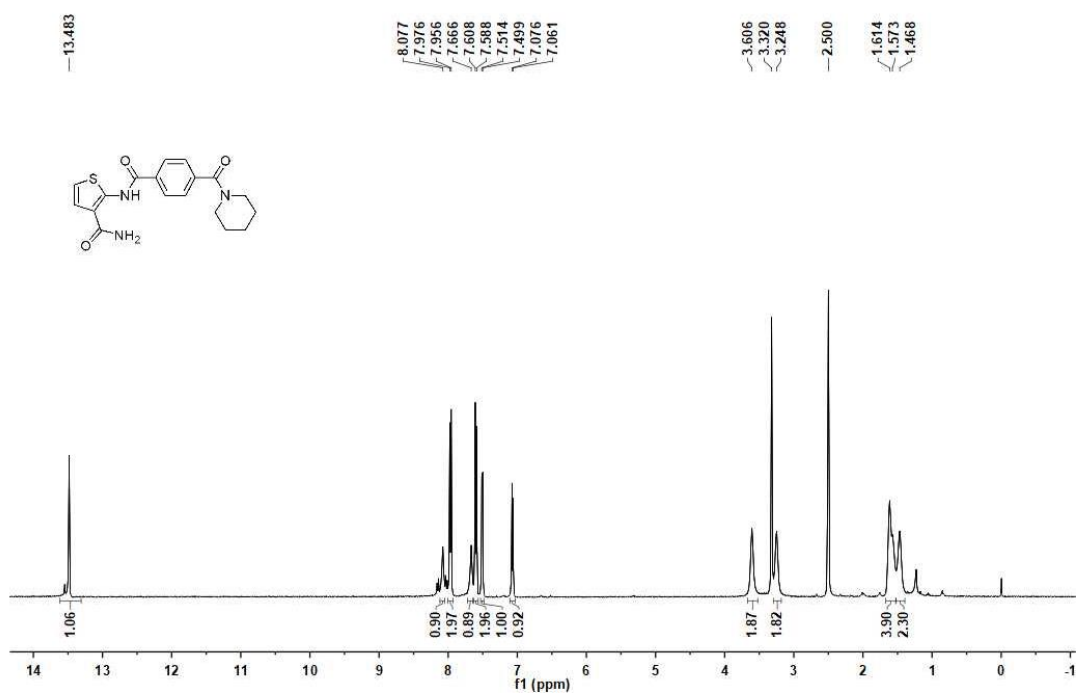

Figure S63. <sup>1</sup>H NMR spectrum of 25d.

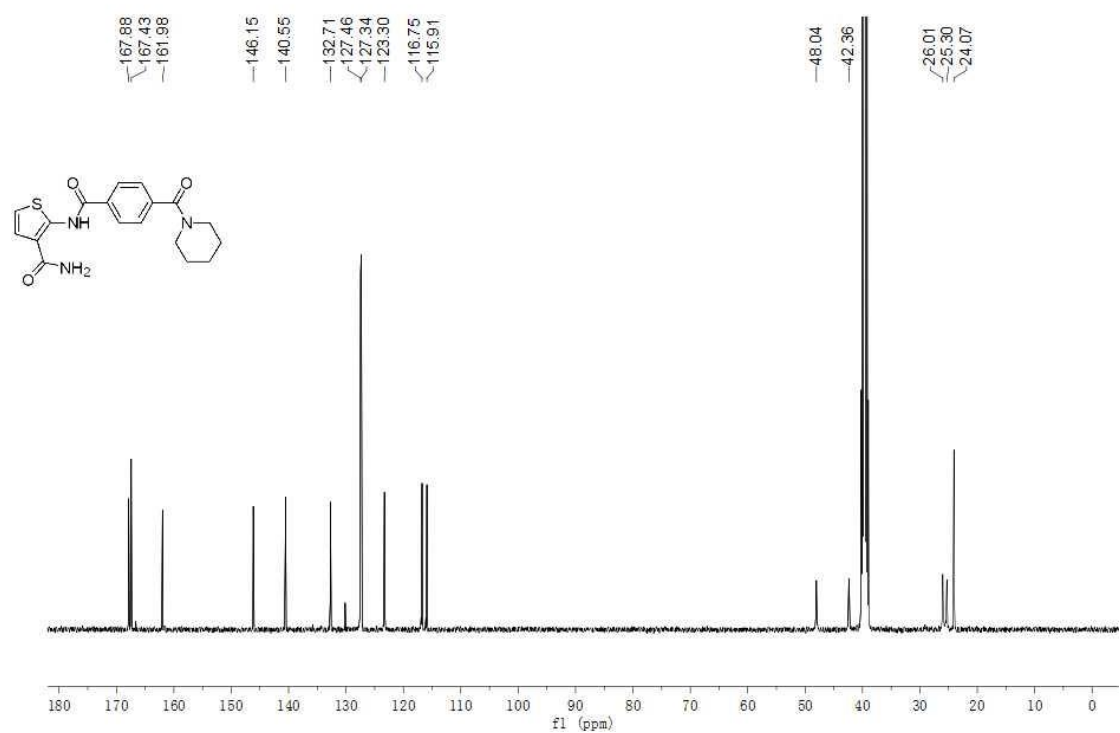

Figure S64. <sup>13</sup>C NMR spectrum of 25d.

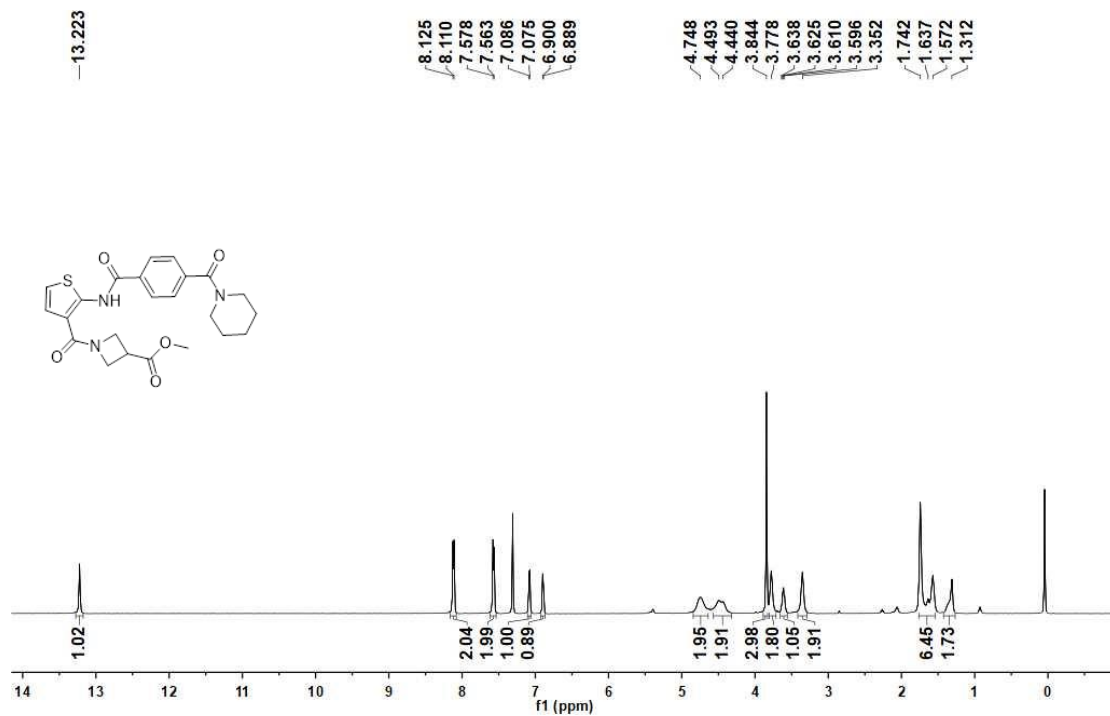

Figure S65. <sup>1</sup>H NMR spectrum of 25e.

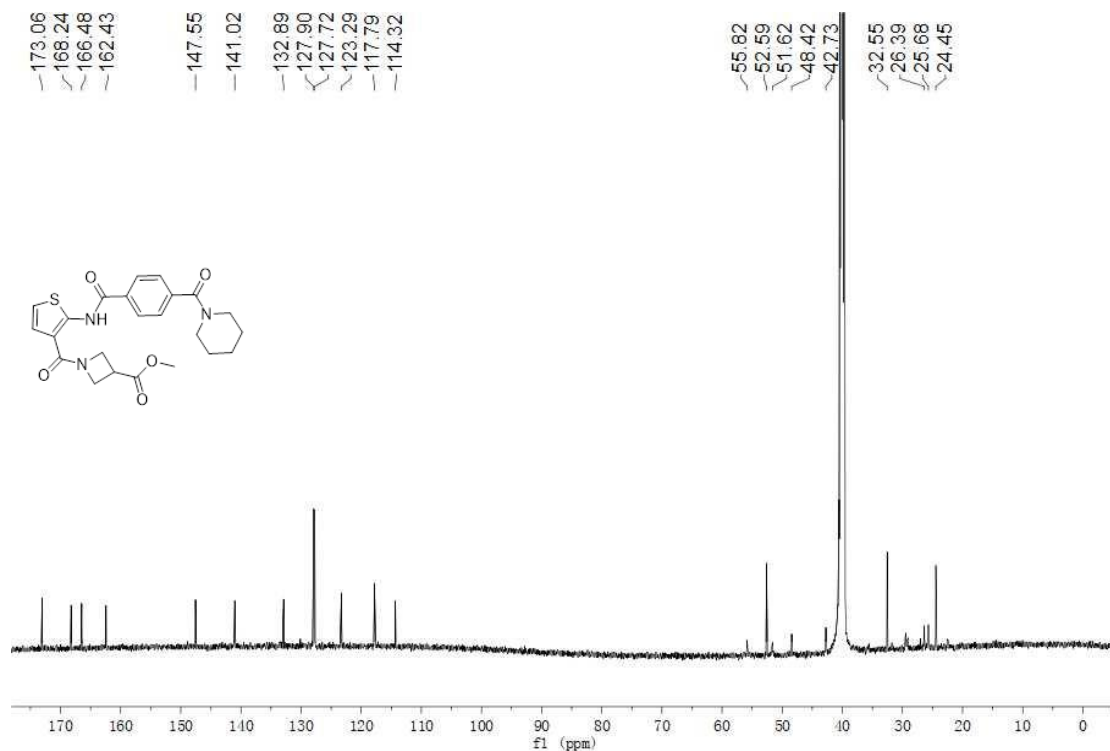

Figure S66. <sup>13</sup>C NMR spectrum of 25e.

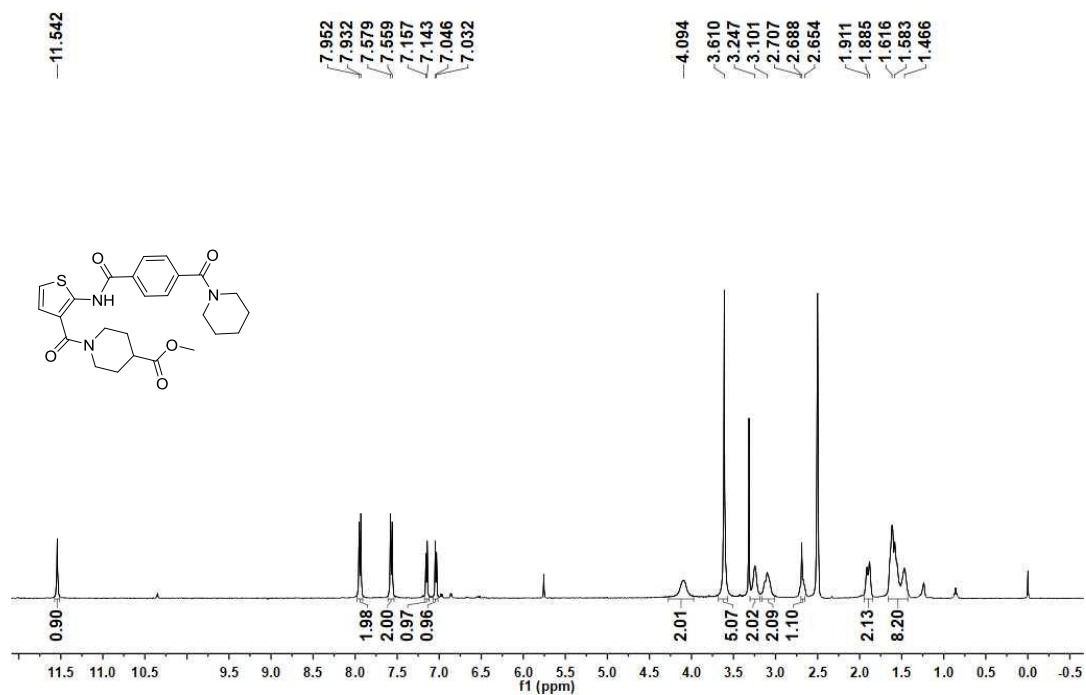

Figure S67. <sup>1</sup>H NMR spectrum of 25f.

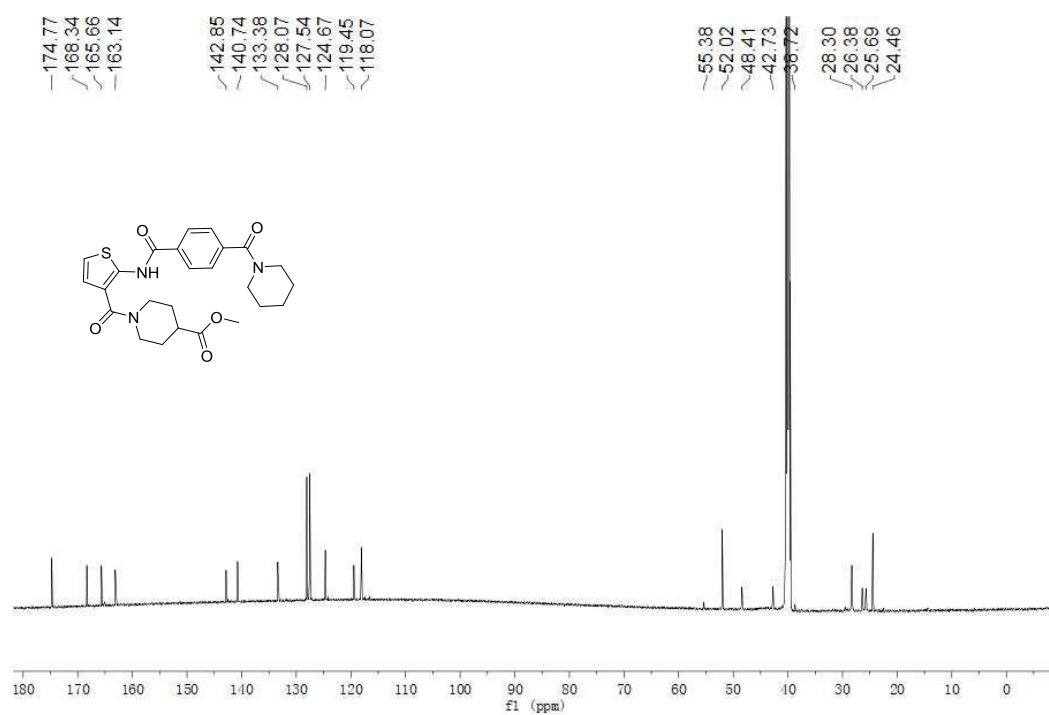

Figure S68. <sup>13</sup>C NMR spectrum of 25f.

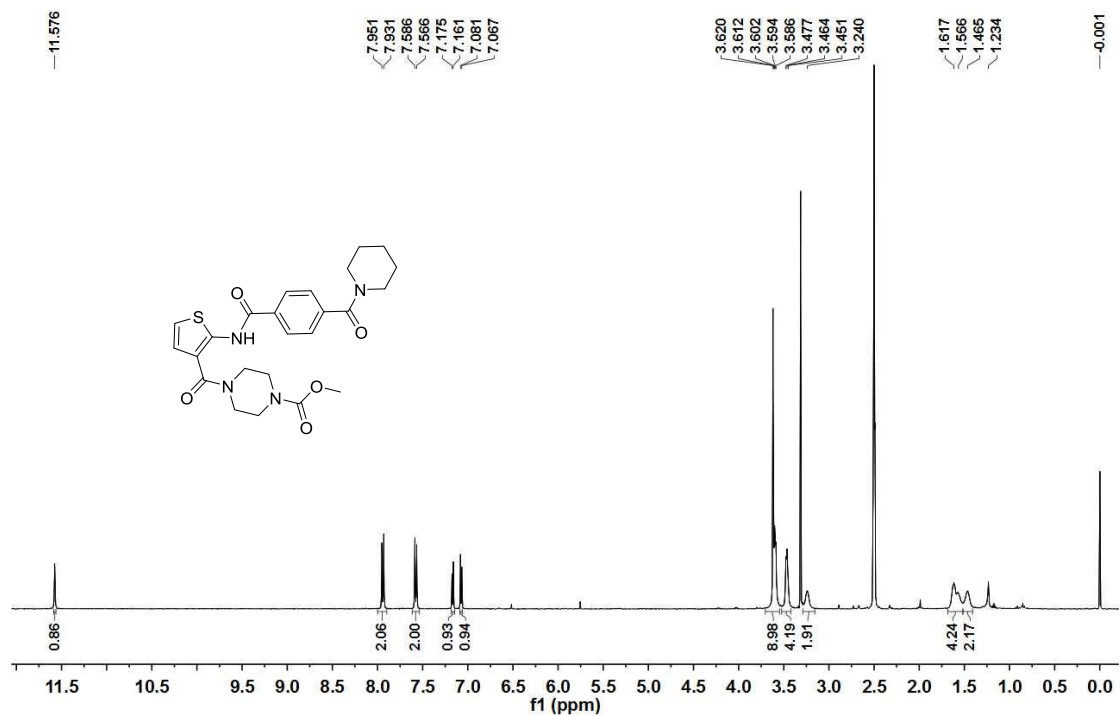

Figure S69. <sup>1</sup>H NMR spectrum of 25g.

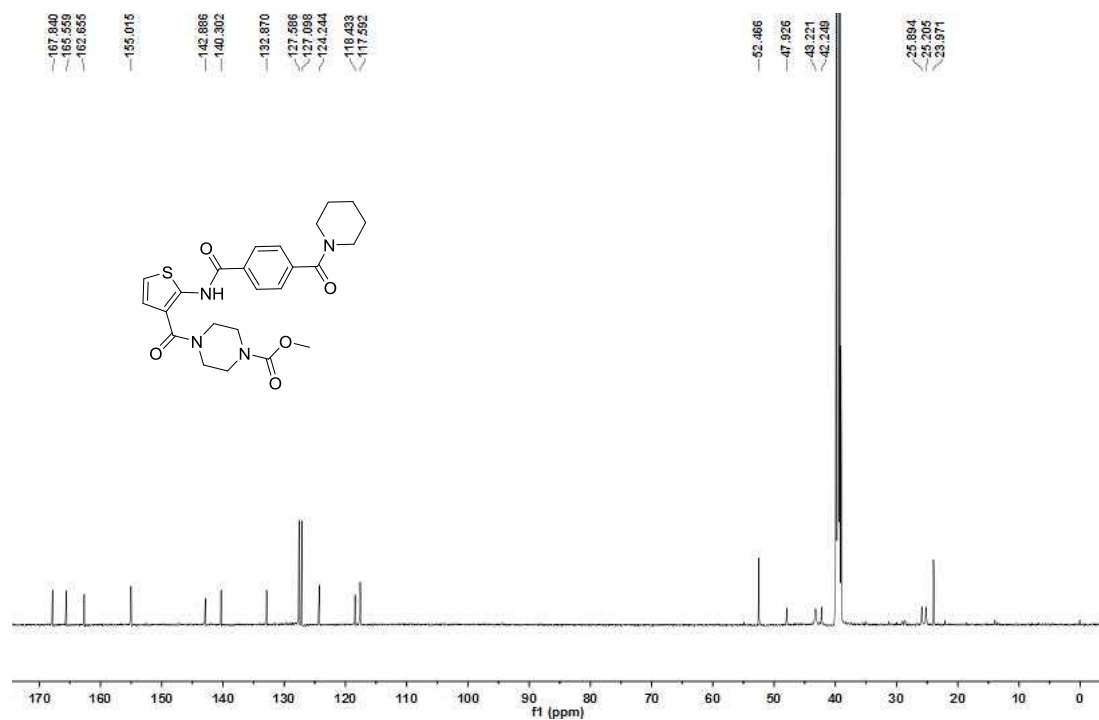

Figure S70. <sup>13</sup>C NMR spectrum of 25g.

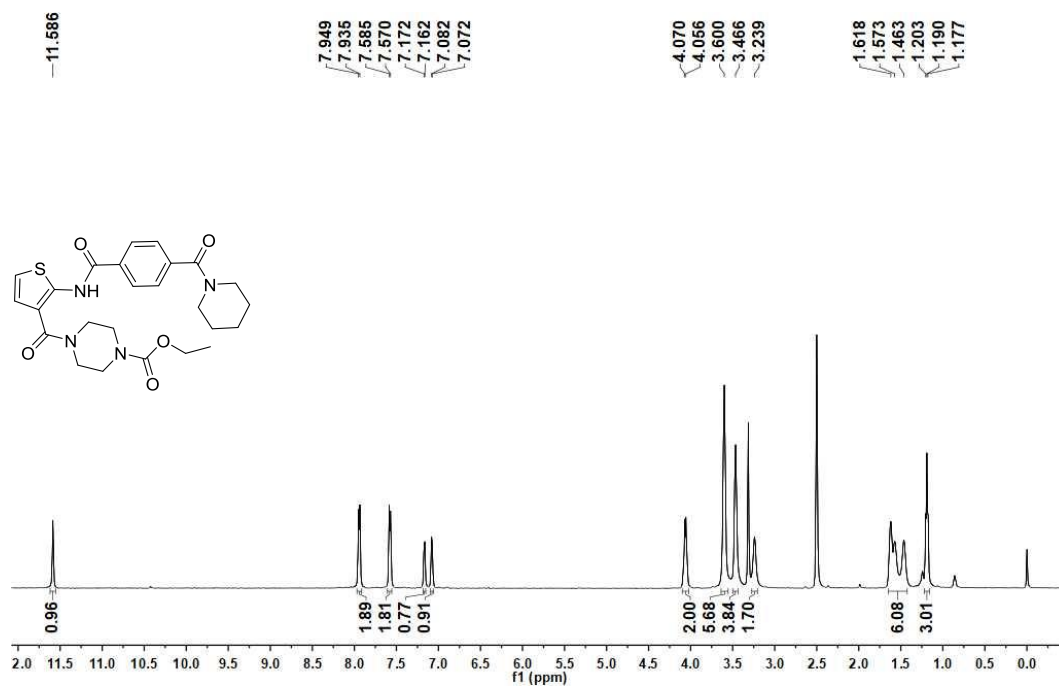

Figure S71. <sup>1</sup>H NMR spectrum of 25h.

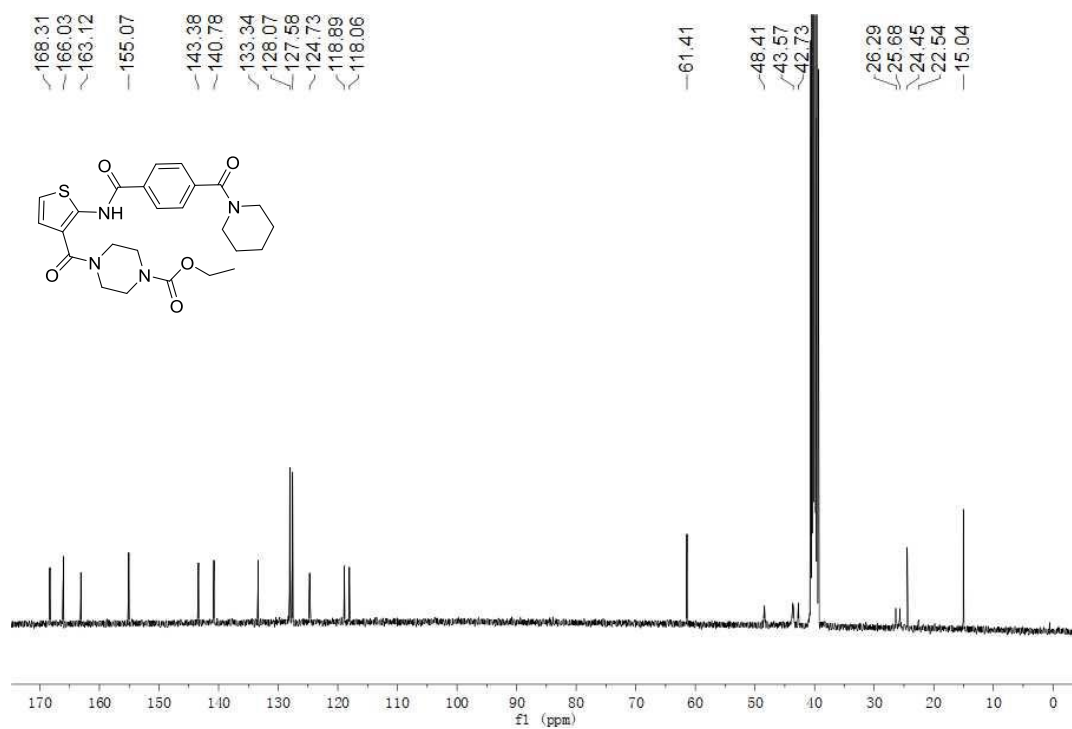

Figure S72. <sup>13</sup>C NMR spectrum of 25h.

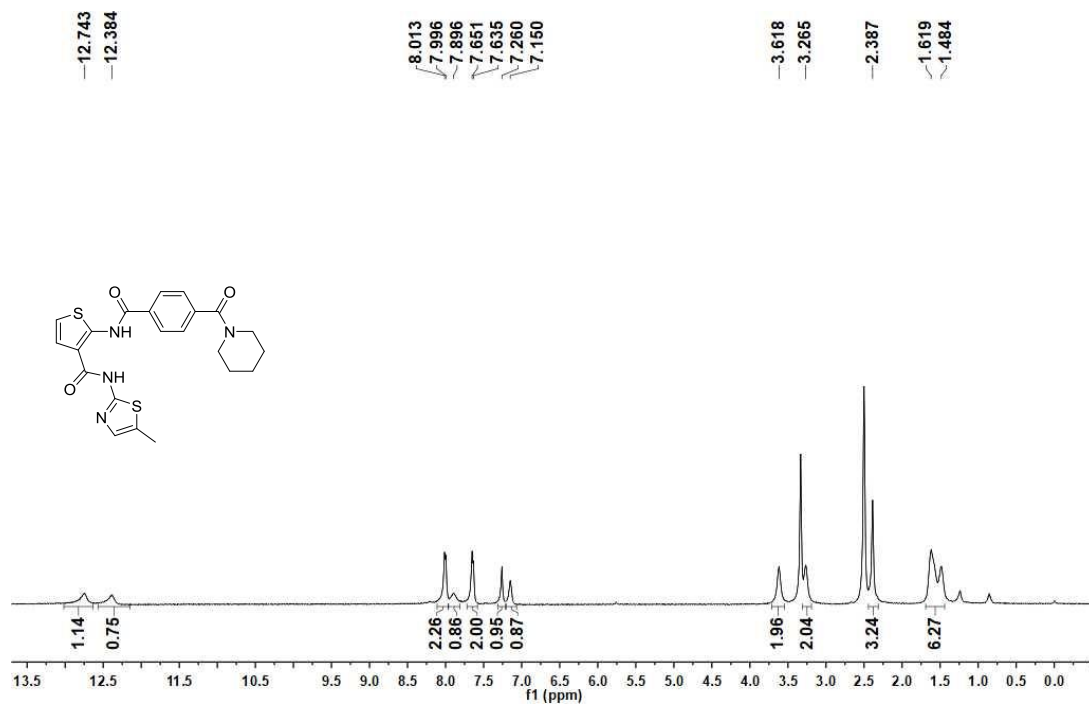

Figure S73. <sup>1</sup>H NMR spectrum of 25i.

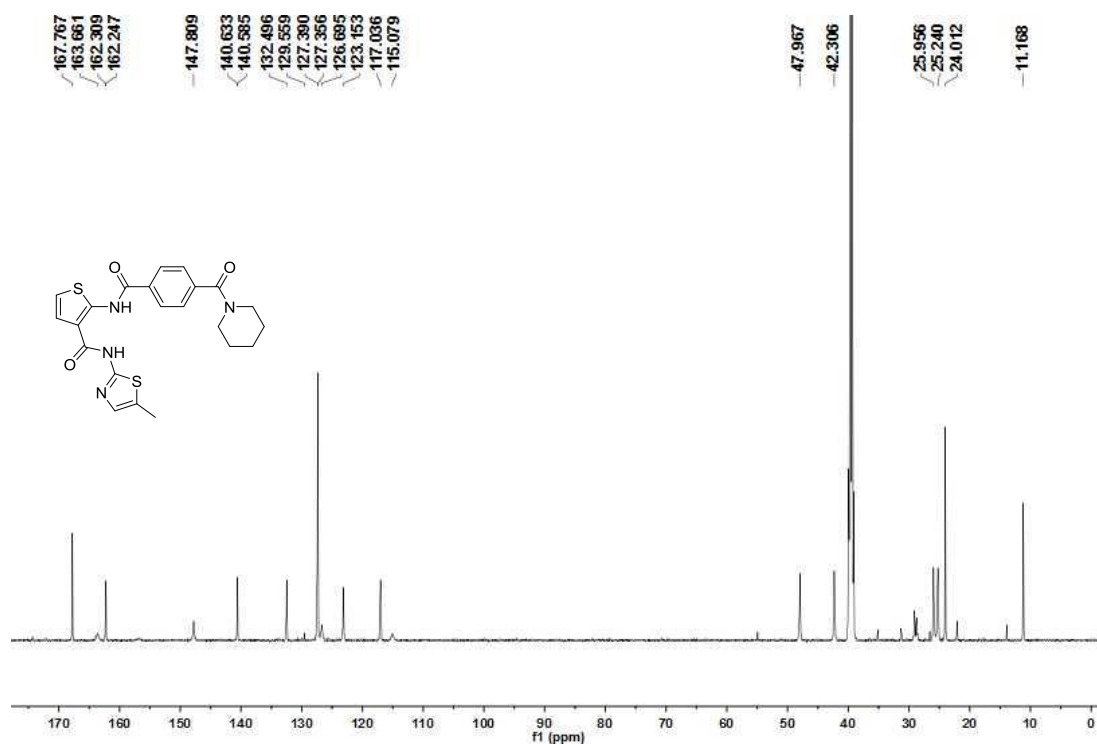

Figure S74. <sup>13</sup>C NMR spectrum of 25i.

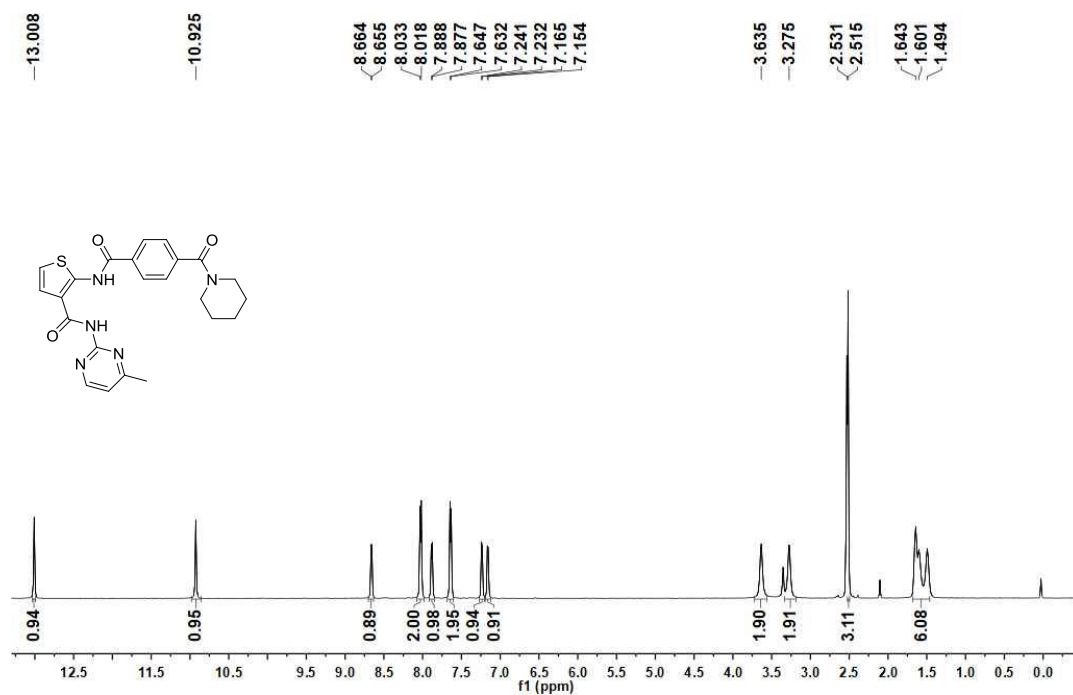

Figure S75. <sup>1</sup>H NMR spectrum of 25j.

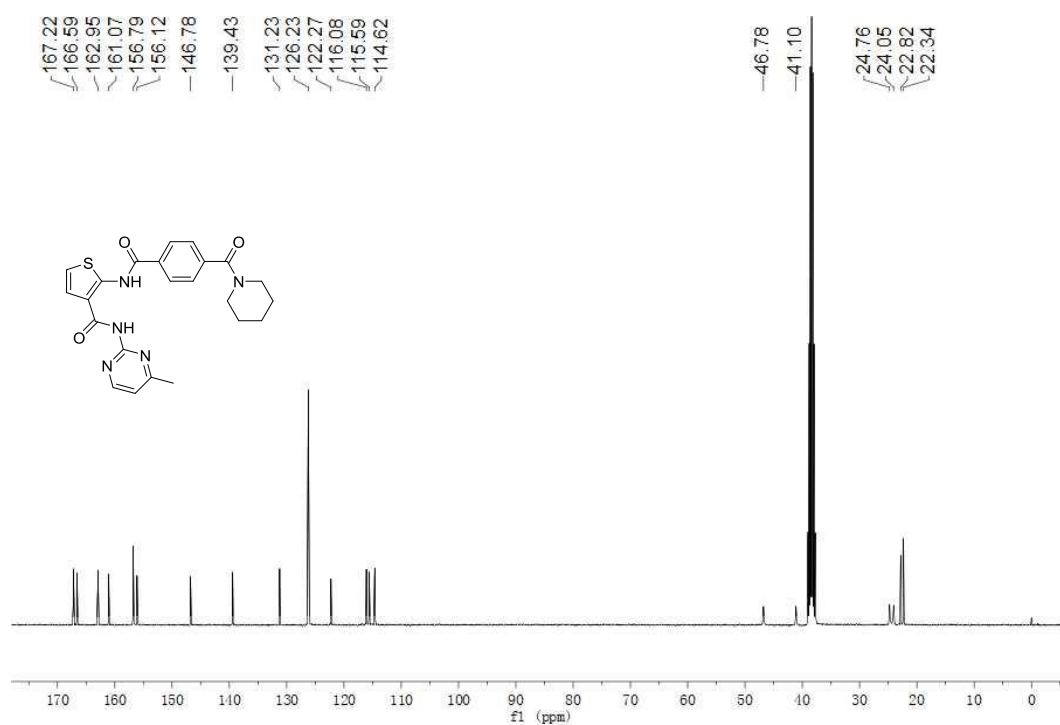

Figure S76. <sup>13</sup>C NMR spectrum of 25j.

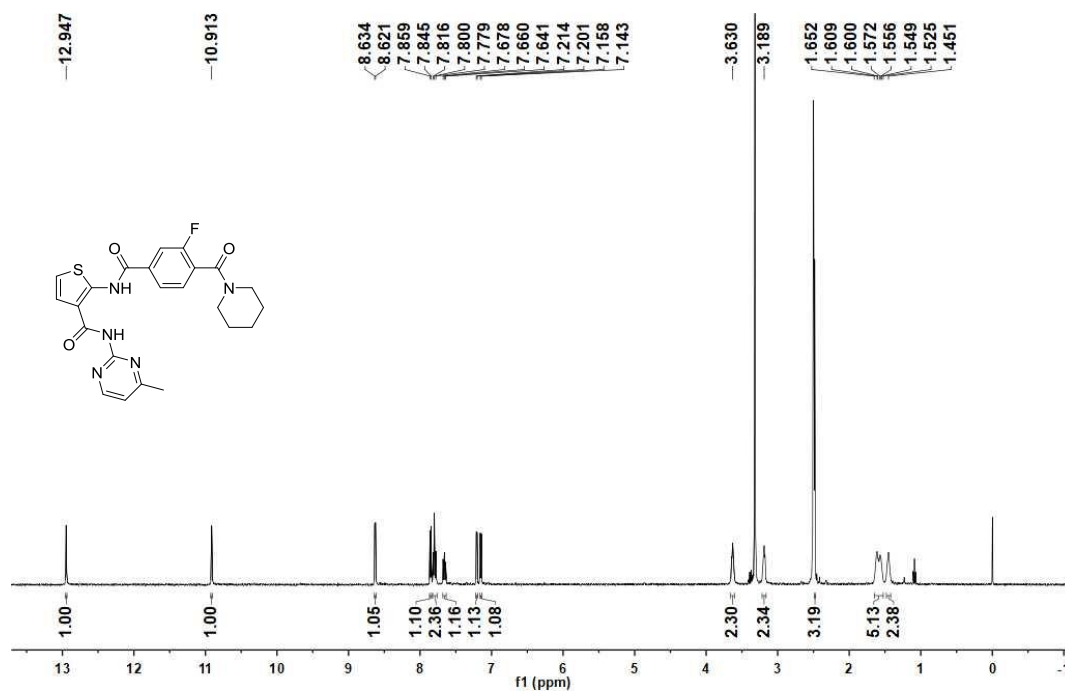

Figure S77. <sup>1</sup>H NMR spectrum of 25k.

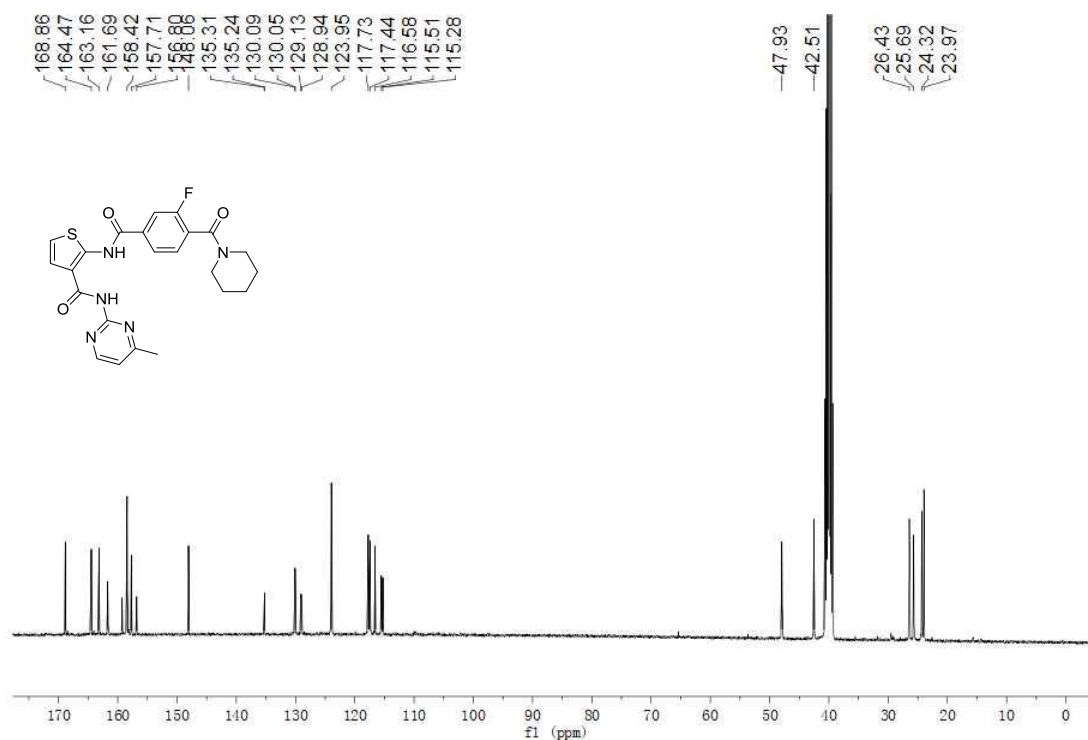

Figure S78. <sup>13</sup>C NMR spectrum of 25k.



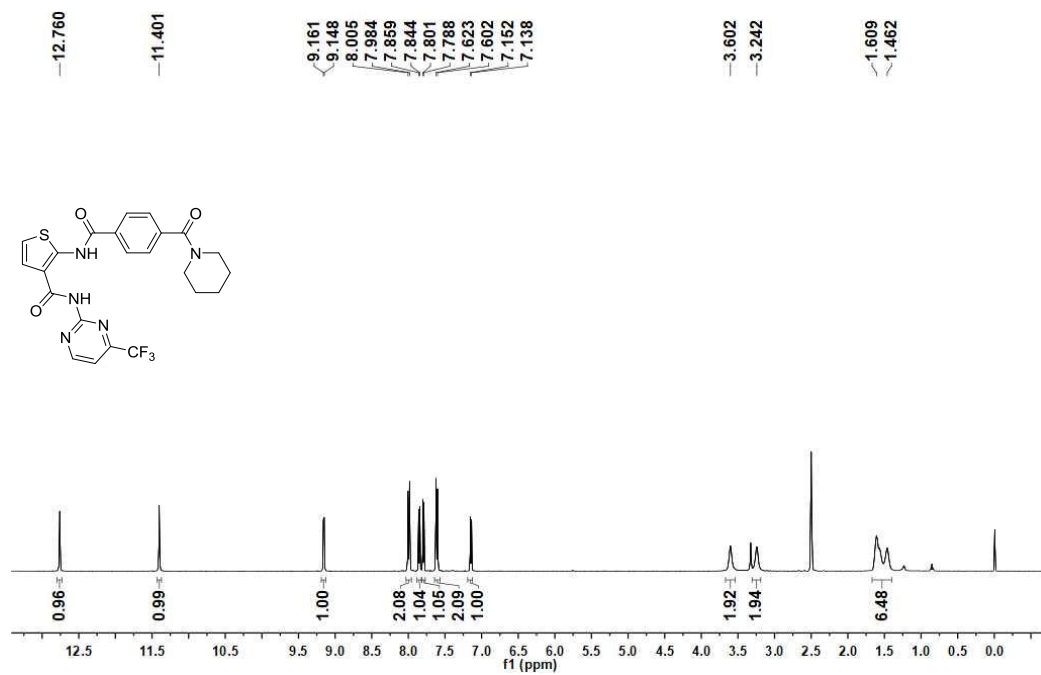

Figure S79. <sup>1</sup>H NMR spectrum of 25I.

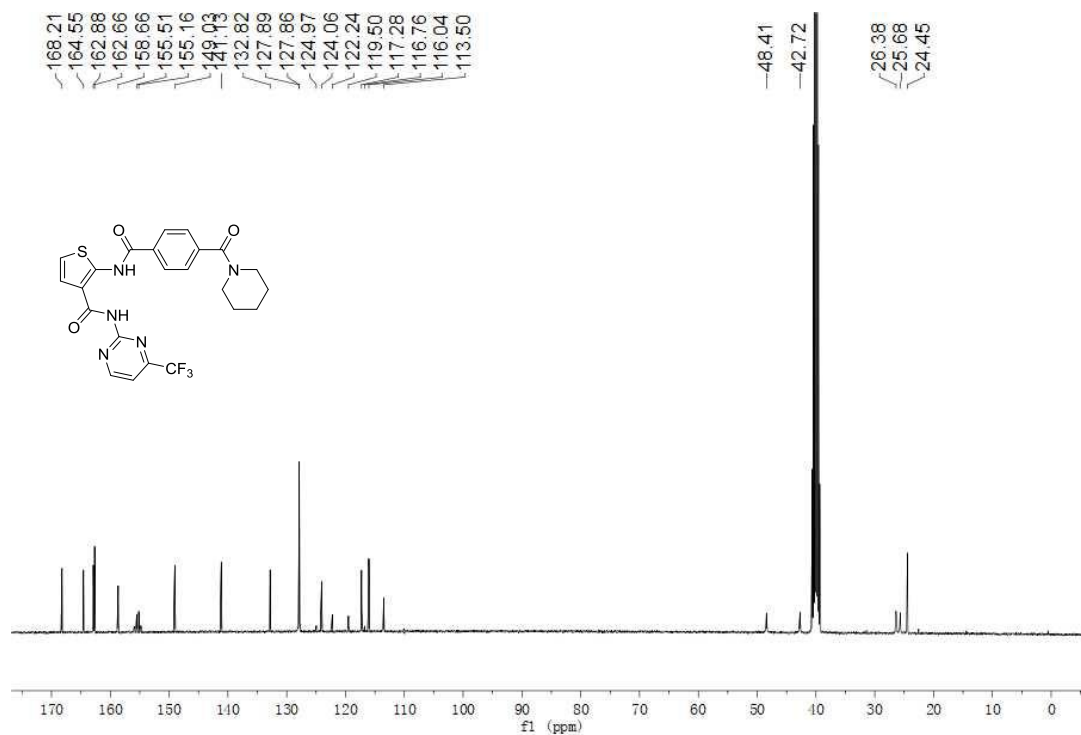

Figure S80. <sup>13</sup>C NMR spectrum of 25I.

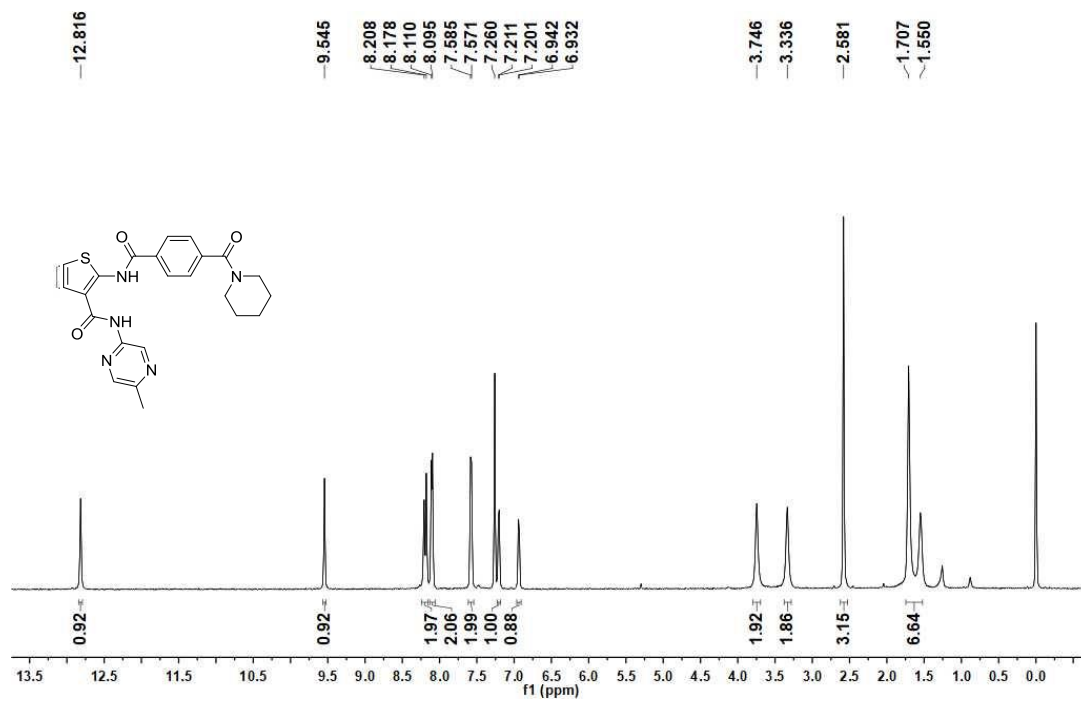

Figure S81. <sup>1</sup>H NMR spectrum of 25m.

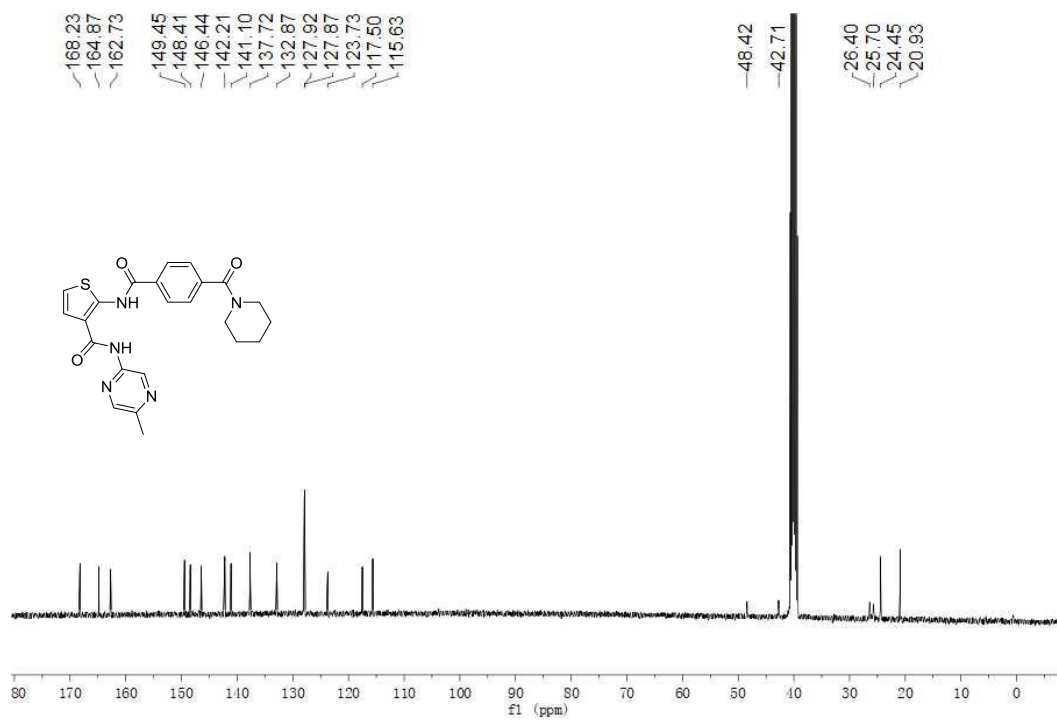

Figure S82. <sup>13</sup>C NMR spectrum of 25m.

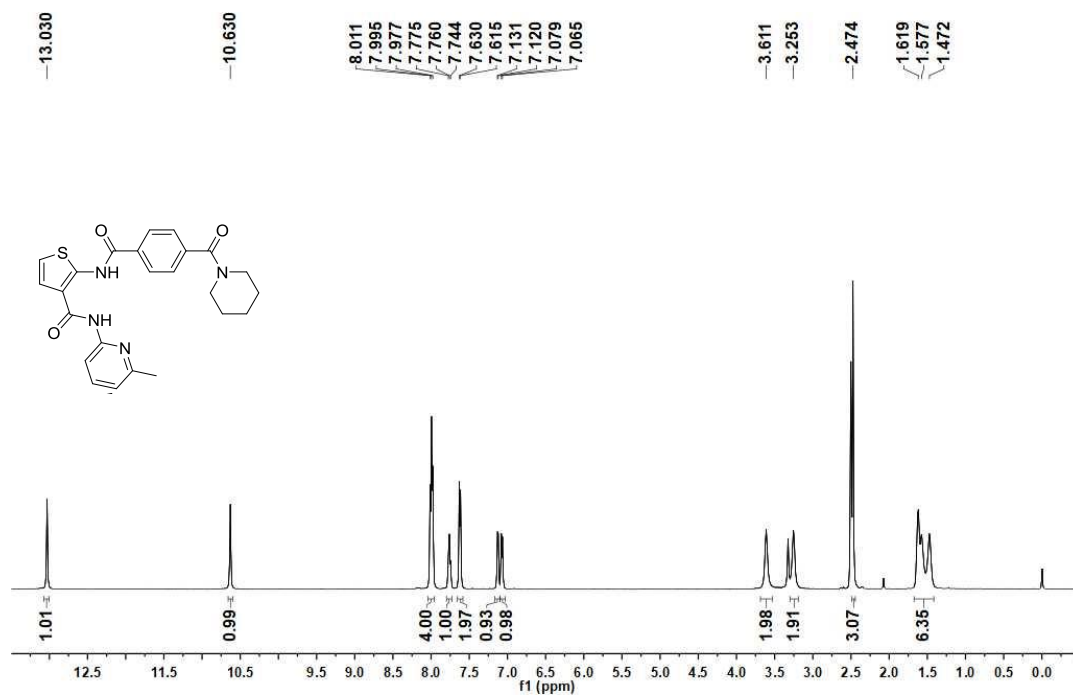

Figure S83. <sup>1</sup>H NMR spectrum of 25n.

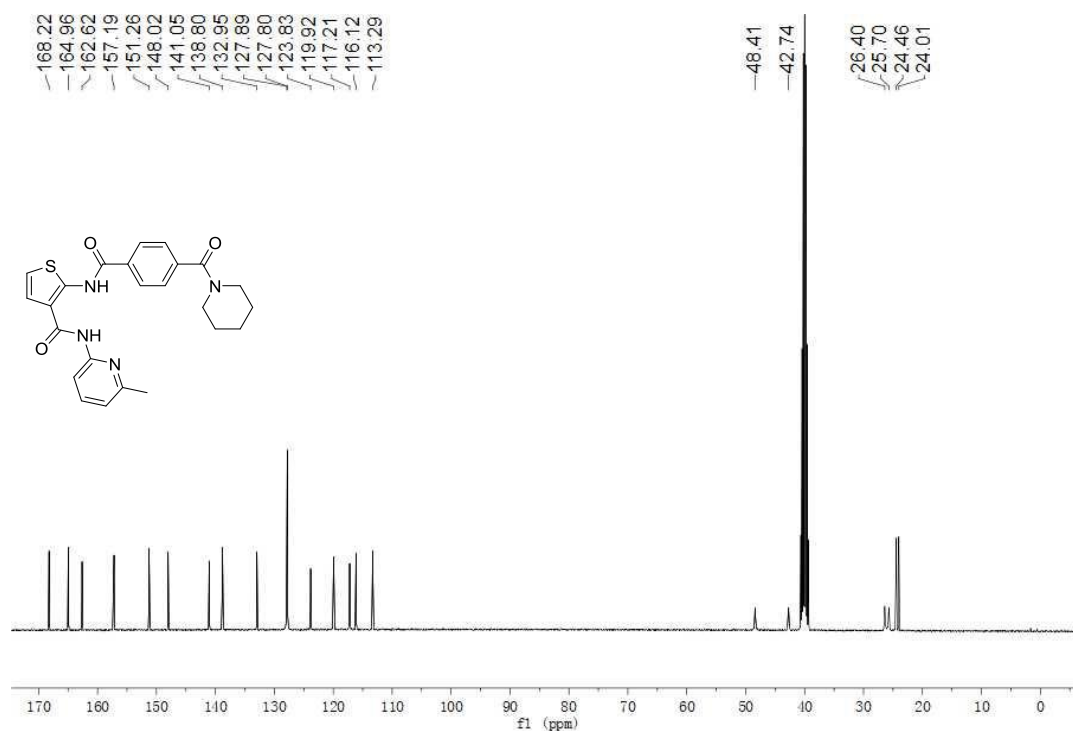

Figure S84. <sup>13</sup>C NMR spectrum of 25n.

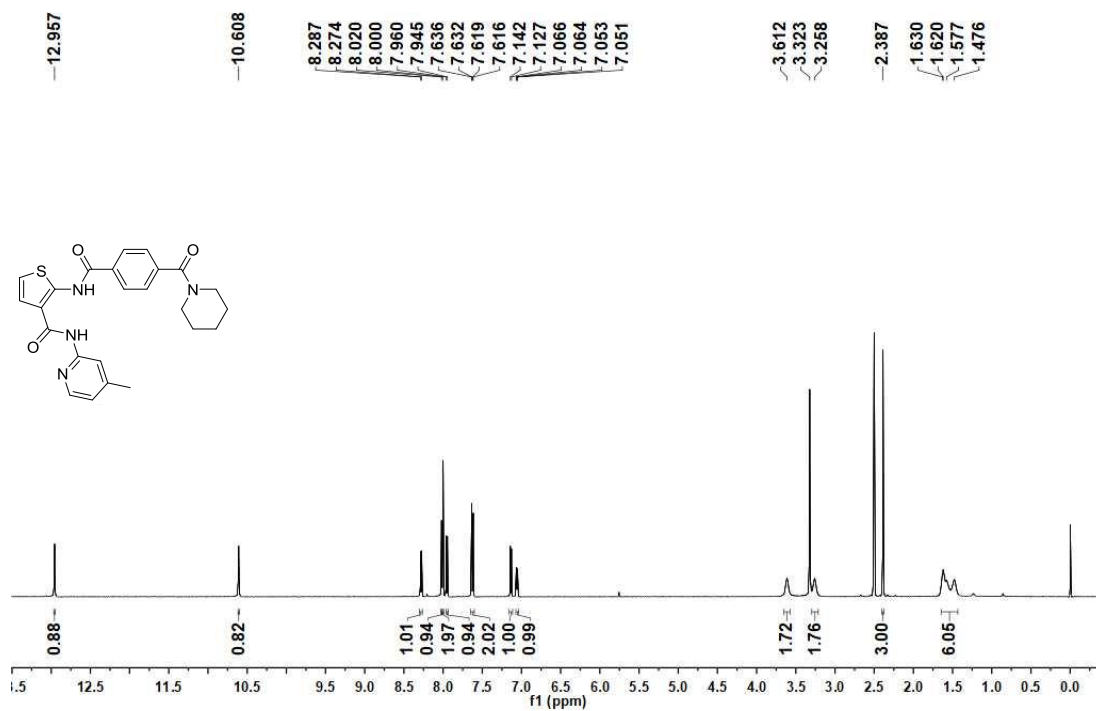

Figure S85. <sup>1</sup>H NMR spectrum of 25o.

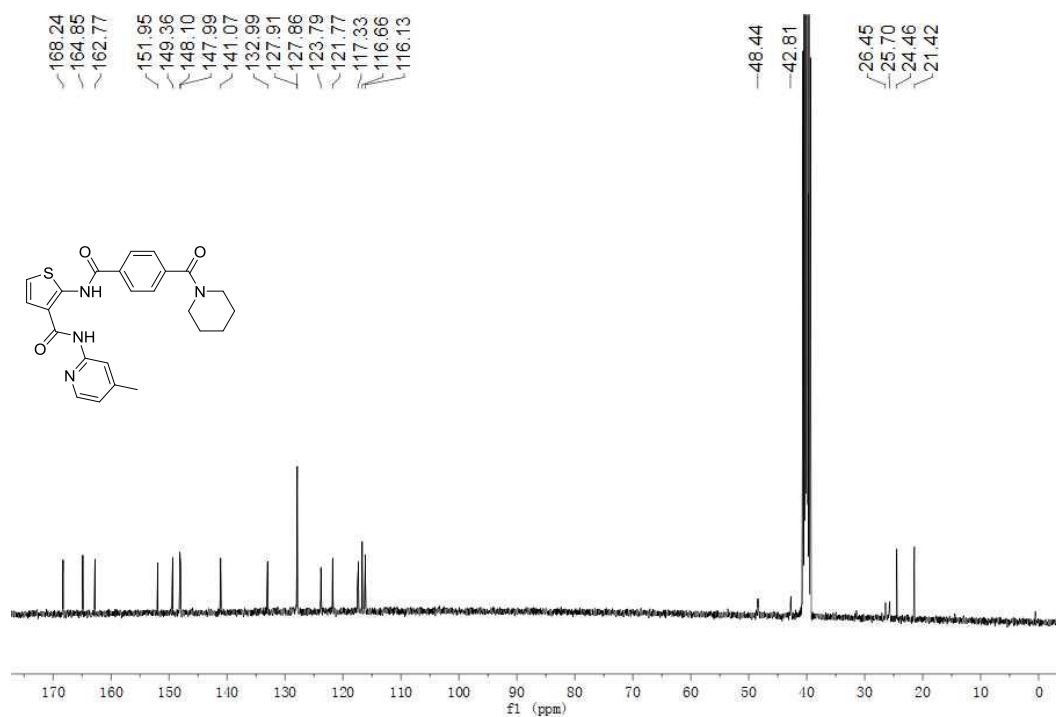

Figure S86. <sup>13</sup>C NMR spectrum of 25o.

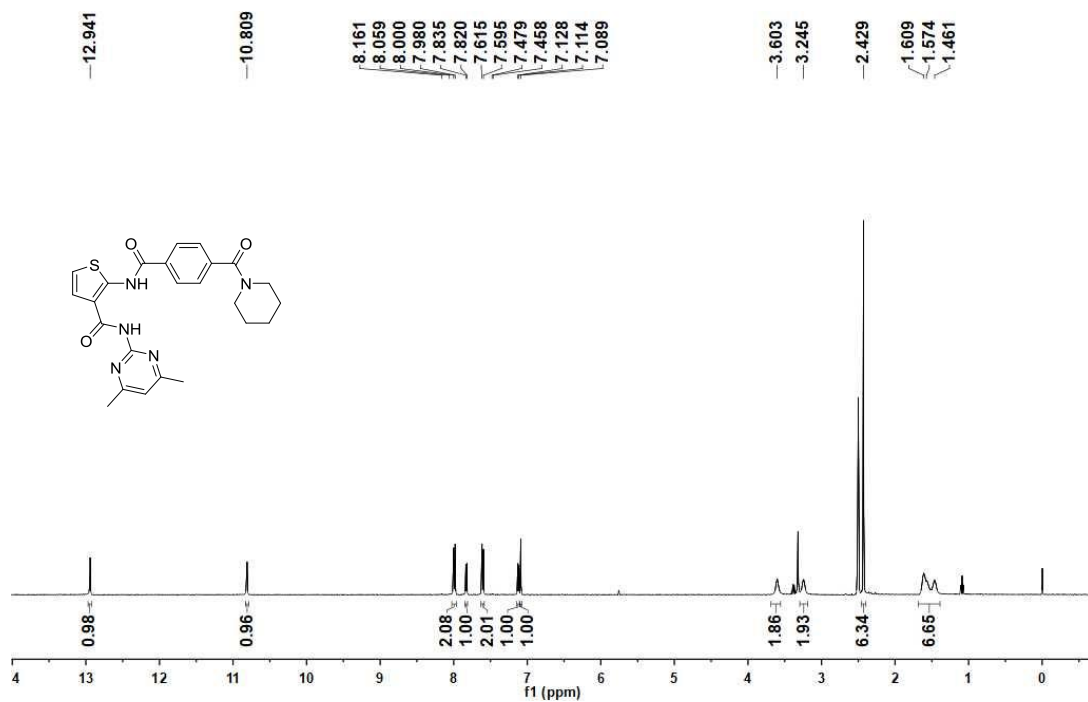

Figure S87. <sup>1</sup>H NMR spectrum of 25p.

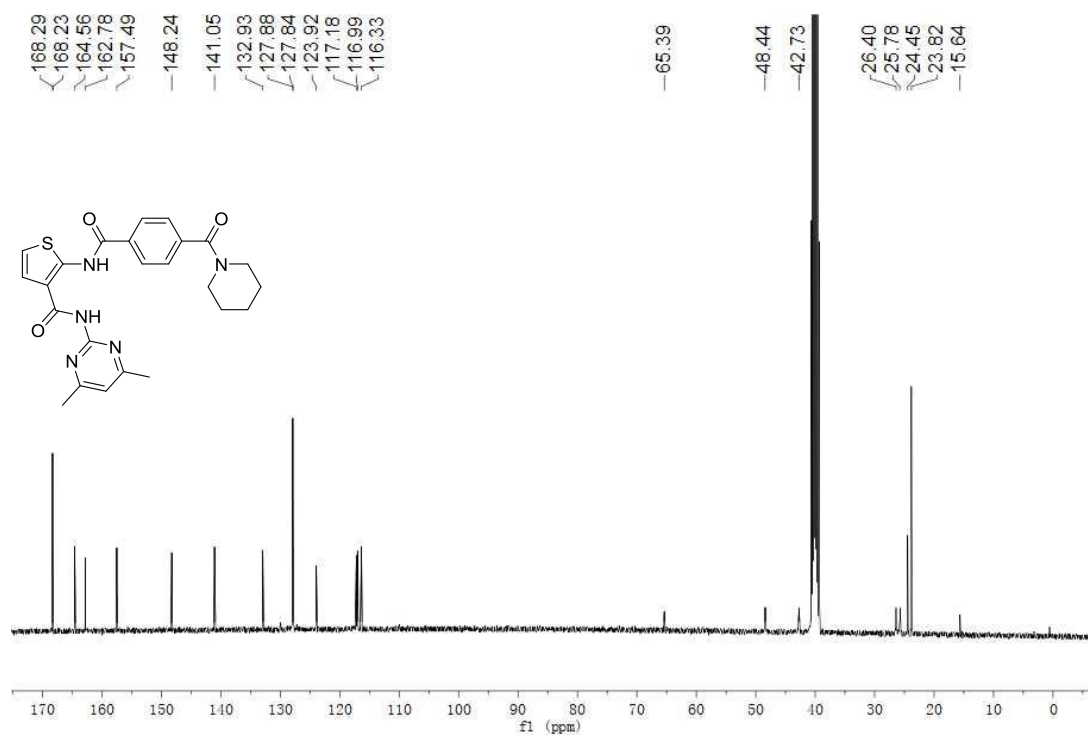

Figure S88. <sup>13</sup>C NMR spectrum of 25p.

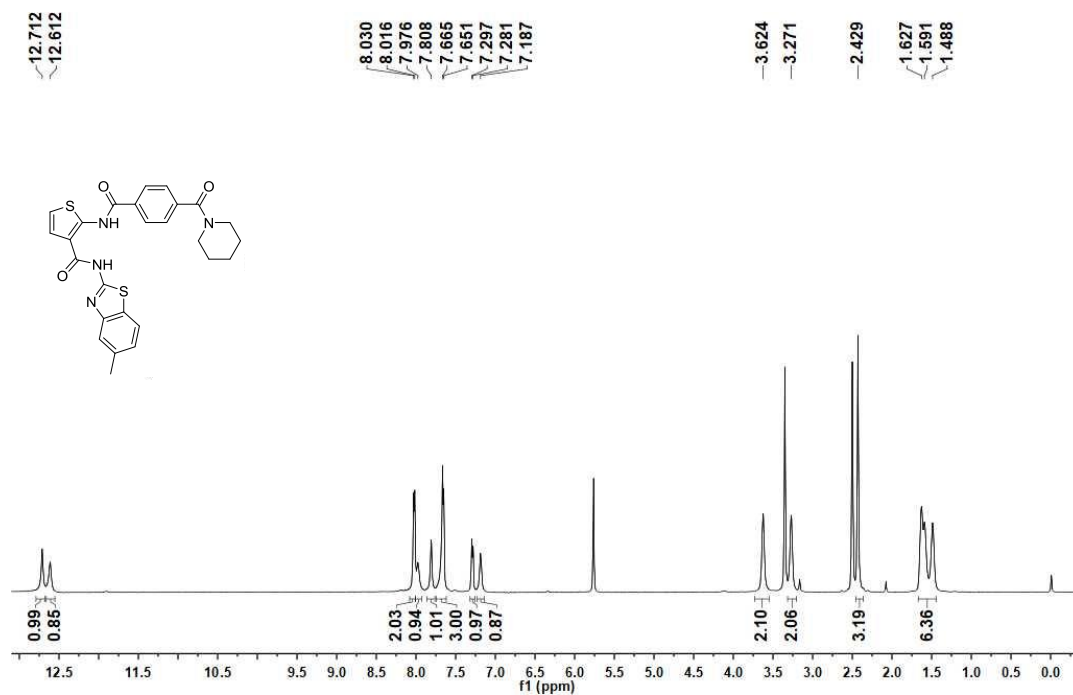

Figure S89. <sup>1</sup>H NMR spectrum of 25q.

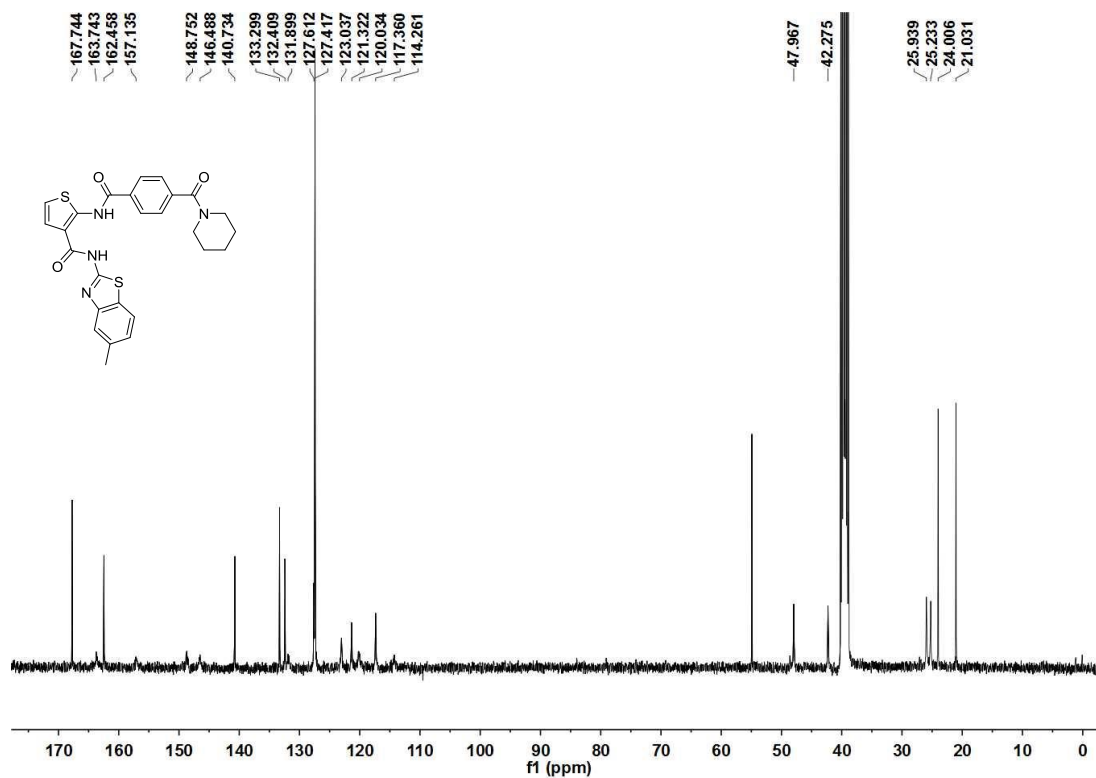

Figure S90. <sup>13</sup>C NMR spectrum of 25q.

### **Molecular docking**

Molecular docking calculations were conducted using CDOCKER protocol in Discovery Studio 2018. Firstly, the protein structure (4KW5) was firstly prepared by adding the hydrogen atoms, inserting the missing loop regions, removing the water molecules, adding missing atoms and deleting alternate conformations (disorder) using the Prepare Protein protocol. The docking protocol reproduced the binding modes of TCA1 with an RMSD of less than 1 Å from the crystallographic pose. Secondly, compound **23j** was minimized by Full Minimization tool using CHARMM forcefield. The radius of binding site was set as 12 Å. Then, compound **23j** was docked to the binding site. The pose cluster radius was set as 0.5 Å. This procedure consisted in a simulated annealing refinement (2000 steps at 700 K, 5000 steps at 300 K) followed by a final full force field minimization using CHARMM. The top 10 poses were retained with the favorable binding mode, and one of them has been selected with highest -CDOCKER\_ENERGY.
